# Supplementary material for: Catalytic, metal-free alkylheteroarylation of alkenes via distal heteroaryl ipso-migration
Source: Royal Society of Chemistry journal article supplement (doi:10.1039/c8cc03911a), 2018-01-01
Supplement: c8cc03911a1.pdf [file c8cc03911a1.pdf]

## Supporting Information For

# Catalytic, Metal-free Alkylheteroarylation of Alkenes via Distal Heteroaryl *ipso*-Migration

Yonghui He,<sup>a</sup> Yaqi Wang,<sup>a</sup> Jun Gao,<sup>a</sup> Liang Zeng,<sup>a</sup> Shusheng Li<sup>a</sup>, Wei Wang,<sup>a</sup>

Xiaohui Zheng,<sup>b</sup> Shengyong Zhang,<sup>c</sup> Lijun Gu<sup>a\*</sup> and Ganpeng Li<sup>a\*</sup>

<sup>a</sup> Key Laboratory of Chemistry in Ethnic Medicinal Resources, State Ethnic Affairs Commission  
& Ministry of Education, Yunnan Minzu University, Kunming, Yunnan Province, 650500, P. R.  
China

<sup>b</sup> College of Life Science, Northwest University, Xi'an, Shanxi Province, 710069, P. R. China

<sup>c</sup> Department of Chemistry, School of Pharmacy, Fourth Military Medical University, Xi'an,  
Shanxi Province, 710032, P. R. China

## **List of Contents**

**(A) Materials and equipment**

**(B) Typical experimental procedure**

**(C) Experimental for migratory efficiency**

**(D) Analytical data**

**(E) Spectra**

**(F) Computational studies**

## **(A) Materials and equipment**

Reagents were obtained commercially and used as received.  $^1\text{H}$  NMR spectra were recorded on a Bruker-400 NMR spectrometer using TMS as an internal standard. Chemical shift values ( $\delta$ ) are given in ppm. Coupling constants ( $J$ ) were measured in Hz. High Resolution mass spectrometer (HRMS) spectra were recorded on a Bruker micrOTOF-Q II analyzer. 200-300 mesh silica gel was used for column chromatography.

## **(B) Typical experimental procedure for the difunctionalization of olefins**

To a Schlenk tube were added Tertiary alcohol **1** (0.2 mmol, 1 equiv), MeCN **2** (1.0 mL), TBPB (0.8 mmol, 4 equivi). Then the tube was charged with argon, and was stirred at 90 °C for 20 h. After the reaction was finished, the reaction mixture was diluted in 30 mL ethyl acetate, washed with a saturated solution of brine (8 mL), saturated  $\text{NaHCO}_3$  (10 mL), a saturated solution of brine (8 mL), dried ( $\text{MgSO}_4$ ) and concentrated in vacuum, and the resulting residue was purified by silica gel column chromatography (petroleum ether/ethyl acetate) to give the product **3**.

## **(C) Experimental for migratory efficiency**

To a Schlenk tube were added benzothiazole-substituted tertiary alcohol **1m** (0.2 mmol), TBPB (0.8 mmol, 4 equivi), MeCN (1.0 mL). Then the tube was charged with argon, and was stirred at 90 °C for 20 h. After the reaction was finished, the reaction mixture was diluted in 30 mL ethyl acetate, washed with a saturated solution of brine (8 mL), saturated  $\text{NaHCO}_3$  (10 mL), a saturated solution of brine (8 mL), dried ( $\text{MgSO}_4$ ) and concentrated in vacuum, and the resulting residue was purified by silica gel column chromatography (petroleum ether/ethyl acetate) to give the products **A** and **B**.

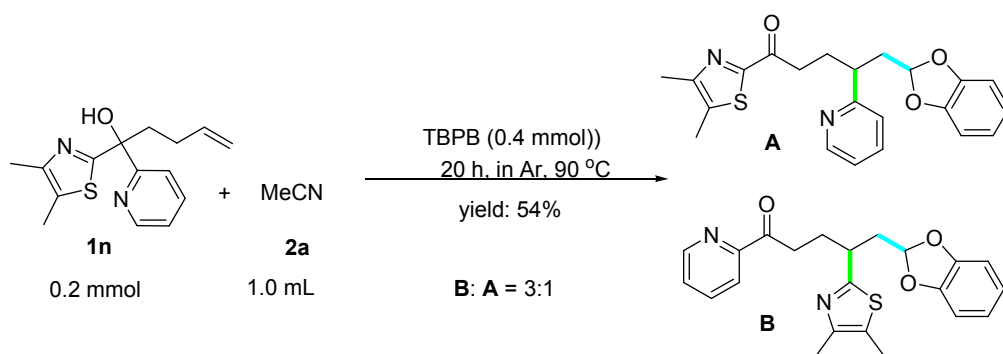

#### (D) Characterization data of compounds

4-(Benzo[d]thiazol-2-yl)-7-oxo-7-phenylheptanenitrile (3aa):

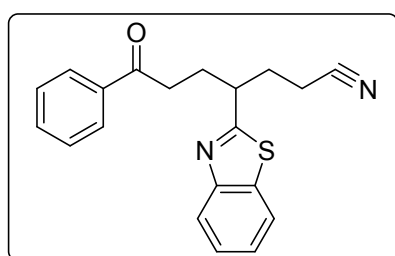

Yellow oil;  $^1\text{H}$  NMR (400 MHz,  $\text{CDCl}_3$ ),  $\delta$ : 8.02 (d,  $J = 8.0$  Hz, 1H), 8.00-7.88 (m, 3H), 7.57-7.50 (m, 2H), 7.46-7.40 (m, 3H), 3.49-3.42 (m, 1H), 3.09-2.99 (m, 2H), 2.47-2.42 (m, 2H), 2.38-2.21 (m, 4H);  $^{13}\text{C}$  NMR (100MHz,  $\text{CDCl}_3$ )  $\delta$ : 198.8, 172.5, 153.0, 136.5, 134.5, 133.2, 128.6, 127.9, 126.3, 125.3, 122.9, 121.8, 119.0, 43.1, 35.6, 31.5, 29.7, 15.3; LRMS (EI 70 ev)  $m/z$  (%): 334 ( $\text{M}^+$ , 100); HRMS  $m/z$  (ESI) calcd for  $\text{C}_{20}\text{H}_{19}\text{N}_2\text{OS}$  [ $\text{M}+\text{H}$ ] $^+$  335.1213, found 335.1218.

4-(benzo[d]thiazol-2-yl)-7-(4-methoxyphenyl)-7-oxoheptanenitrile (3ab):

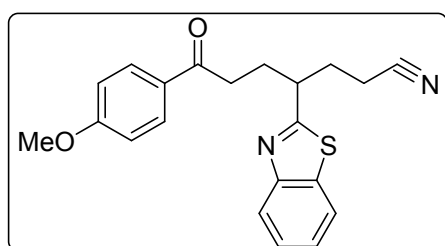

Yellow oil;  $^1\text{H}$  NMR (400 MHz,  $\text{CDCl}_3$ )  $\delta$ : 8.00 (d,  $J = 8.0$  Hz, 1H), 7.88-7.83 (m, 3H), 7.50 (t,  $J = 8.0$  Hz, 1H), 7.41 (t,  $J = 8.0$  Hz, 1H), 6.88 (d,  $J = 8$  Hz, 2H), 3.83 (s, 3H), 3.45-3.36(m, 1H), 2.98-2.93 (m, 2H), 2.44-2.39 (m, 2H), 2.33-2.21 (m, 4H);  $^{13}\text{C}$  NMR (100MHz,  $\text{CDCl}_3$ )  $\delta$ : 197.4, 172.7, 163.5, 153.0, 134.6, 130.2, 129.6, 126.2, 125.2, 122.9, 121.7, 119.0, 113.7, 55.4, 43.2, 35.2, 31.5, 29.8, 15.3.; LRMS (EI 70 ev)

m/z (%): 364 (M<sup>+</sup>, 100); HRMS m/z (ESI) calcd for C<sub>21</sub>H<sub>21</sub>N<sub>2</sub>O<sub>2</sub>S [M+H]<sup>+</sup> 365.1318, found 365.1325.

4-(benzo[d]thiazol-2-yl)-7-oxo-7-(p-tolyl)heptanenitrile (3ac):

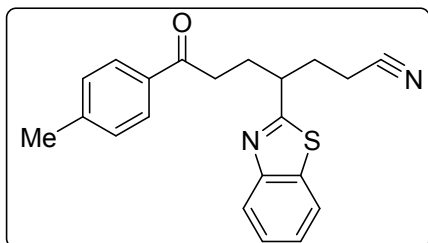

Yellow oil; <sup>1</sup>H NMR (400 MHz, CDCl<sub>3</sub>) δ: 7.98 (d, *J* = 9.0 Hz, 2H), 7.80 (d, *J* = 8.8 Hz, 1H), 7.60 (t, *J* = 7.6 Hz, 2H), 7.47-7.43 (m, 2H), 7.39-7.35 (m, 2H); 3.45-3.38 (m, 1H), 3.02-2.90 (m, 2H), 2.43-2.34 (m, 2H), 2.31-2.20 (m, 4H), 2.03 (s, 3H); <sup>13</sup>C NMR (100MHz, CDCl<sub>3</sub>) δ: 197.5, 172.2, 164.5, 139.5, 134.4, 133.3, 130.8, 129.0, 128.5, 125.2, 122.9, 121.7, 118.9, 42.9, 35.5, 31.4, 29.5, 20.9, 15.2; LRMS (EI 70 ev) m/z (%): 348 (M<sup>+</sup>, 100); HRMS m/z (ESI) calcd for C<sub>21</sub>H<sub>21</sub>N<sub>2</sub>OS[M+H]<sup>+</sup> 349.1369, found 349.1360.

4-(benzo[d]thiazol-2-yl)-7-(4-chlorophenyl)-7-oxoheptanenitrile (3ad):

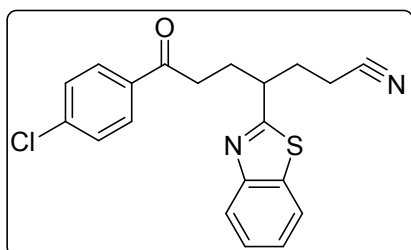

Brown oil; <sup>1</sup>H NMR (400 MHz, CDCl<sub>3</sub>) δ: 7.98 (d, *J* = 8.0 Hz, 1H), 7.87 (d, *J* = 8.0 Hz, 1H), 7.80 (d, *J* = 8.0 Hz, 2H), 7.42-7.37 (m, 4H), 3.46-3.38 (m, 1H), 3.00-2.95(m, 2H), 2.44-2.39 (m, 2H), 2.35-2.20 (m, 4H); <sup>13</sup>C NMR (100MHz, CDCl<sub>3</sub>) δ: 197.6, 172.3, 153.0, 134.8, 134.5, 129.3, 128.9, 127.8, 126.3, 125.6, 125.3, 123.0, 121.8, 43.1, 35.6, 31.5, 26.9, 15.3.; LRMS (EI 70 ev) m/z (%): 368 (M<sup>+</sup>, 100); HRMS m/z (ESI) calcd for C<sub>20</sub>H<sub>18</sub>ClN<sub>2</sub>OS [M+H]<sup>+</sup> 369.0822, found 369.0824.

4-(benzo[d]thiazol-2-yl)-7-(2-chlorophenyl)-7-oxoheptanenitrile (3ae):

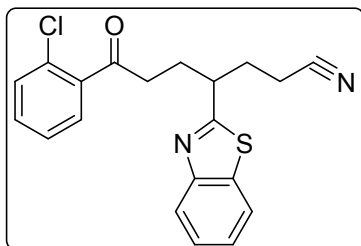

Brown oil;  $^1\text{H}$  NMR (400 MHz,  $\text{CDCl}_3$ )  $\delta$ : 8.09 (d,  $J = 8.0$  Hz, 1H), 7.95 (d,  $J = 8.0$  Hz, 2H), 7.54-7.47 (m, 5H), 3.48-3.43 (m, 1H), 3.38-3.29(m, 2H), 2.44-2.27 (m, 6H);  $^{13}\text{C}$  NMR (100MHz,  $\text{CDCl}_3$ )  $\delta$ : 194.1, 172.2, 165.7, 153.3, 137.1, 134.5, 130.9, 127.7, 127.0, 126.2, 125.4, 122.9, 122.4, 121.7, 119.0, 42.9, 35.8, 31.2, 29.4, 15.2.; LRMS (EI 70 ev)  $m/z$  (%): 368 ( $\text{M}^+$ , 100); HRMS  $m/z$  (ESI) calcd for  $\text{C}_{20}\text{H}_{18}\text{ClN}_2\text{OS}$   $[\text{M}+\text{H}]^+$  369.0822, found 369.0824.

4-(benzo[d]thiazol-2-yl)-7-(naphthalen-2-yl)-7-oxoheptanenitrile (3af):

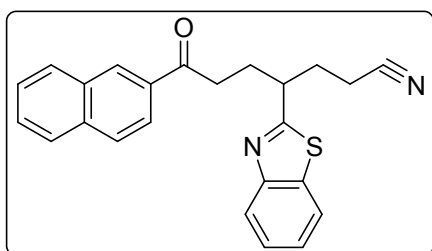

White oil, (1:1 dr);  $^1\text{H}$  NMR (400 MHz,  $\text{CDCl}_3$ )  $\delta$ : 7.98 (t,  $J = 6.4$  Hz, 1H), 7.83 (t,  $J = 8.6$  Hz, 3H), 7.49-7.45 (m, 2H), 7.37-7.31 (m, 3H), 3.61-3.52 (m, 0.5H), 3.50-3.44 (m, 0.5H), 3.01-2.88(m, 2H), 2.84-2.76 (m, 1H), 2.36-2.22 (m, 4H), 2.19-1.99 (m, 4H);  $^{13}\text{C}$  NMR (100 MHz,  $\text{CDCl}_3$ )  $\delta$ : 198.59, 198.50, 172.5, 172.0, 153.0, 152.9, 136.3, 136.2, 134.3, 132.93, 132.91, 128.3, 127.6, 125.9, 124.9, 122.66, 122.62, 121.5, 120.19, 120.12, 42.4, 41.3, 41.2, 37.4, 37.2, 35.3, 35.2, 34.3, 34.1, 31.2, 28.9, 28.7; LRMS (EI 70 ev)  $m/z$  (%): 384 ( $\text{M}^+$ , 100); HRMS  $m/z$  (ESI) calcd for  $\text{C}_{24}\text{H}_{21}\text{N}_2\text{OS}$   $[\text{M}+\text{H}]^+$  385.1369, found 385.1365.

4-(benzo[d]thiazol-2-yl)-7-oxo-7-(thiophen-2-yl)heptanenitrile (3ag):

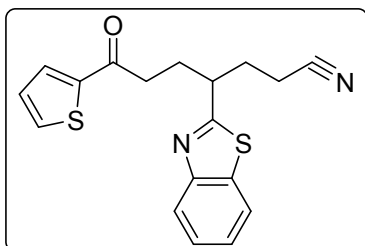

Brown oil;  $^1\text{H}$  NMR (400 MHz,  $\text{CDCl}_3$ )  $\delta$ : 7.98 (d,  $J = 8.0$  Hz, 1H), 7.87 (d,  $J = 8.0$  Hz, 1H), 7.60 (d,  $J = 4.0$  Hz, 2H), 7.49 (t,  $J = 4.0$  Hz, 1H), 7.39 (t,  $J = 8$  Hz, 1H), 7.06 (t,  $J = 4$  Hz, 1H), 3.45-3.36 (m, 1H), 2.97-2.93 (m, 2H), 2.43-2.38 (m, 2H), 2.34-2.20 (m, 4H);  $^{13}\text{C}$  NMR (100MHz,  $\text{CDCl}_3$ )  $\delta$ : 191.7, 172.4, 153.1, 143.8, 134.6, 133.7, 131.9, 128.0, 126.3, 125.3, 122.9, 121.7, 118.9, 43.1, 36.3, 31.4, 29.8, 15.2; LRMS (EI 70 ev)  $m/z$  (%): 340 ( $\text{M}^+$ , 100); HRMS  $m/z$  (ESI) calcd for  $\text{C}_{18}\text{H}_{17}\text{N}_2\text{OS}_2$  [ $\text{M}+\text{H}$ ] $^+$  341.0776, found 341.0775.

4-(benzo[d]thiazol-2-yl)-7-oxooctanenitrile (3ah):

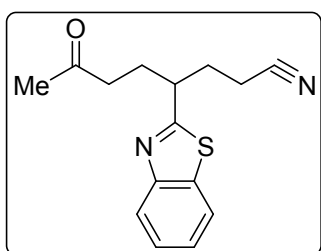

White oil;  $^1\text{H}$  NMR (400 MHz,  $\text{CDCl}_3$ )  $\delta$ : 7.98 (d,  $J = 8.4$  Hz, 1H), 7.87 (d,  $J = 8.0$  Hz, 1H), 7.49 (t,  $J = 8.0$  Hz, 1H), 7.39 (t,  $J = 8.0$  Hz, 1H), 3.34-3.26 (m, 1H), 2.48-2.44 (m, 2H), 2.40-2.35 (m, 2H), 2.33-2.14 (m, 4H), 2.08 (s, 3H);  $^{13}\text{C}$  NMR (100MHz,  $\text{CDCl}_3$ )  $\delta$ : 207.3, 172.4, 153.0, 134.5, 129.1, 126.2, 125.3, 122.9, 121.7, 118.9, 42.8, 40.5, 31.3, 30.0, 29.1, 15.3; LRMS (EI 70 ev)  $m/z$  (%): 272 ( $\text{M}^+$ , 100); HRMS  $m/z$  (ESI) calcd for  $\text{C}_{15}\text{H}_{17}\text{N}_2\text{OS}$  [ $\text{M}+\text{H}$ ] $^+$  273.1056, found 273.1063.

4-(6-chlorobenzo[d]thiazol-2-yl)-7-oxo-7-phenylheptanenitrile (3ai):

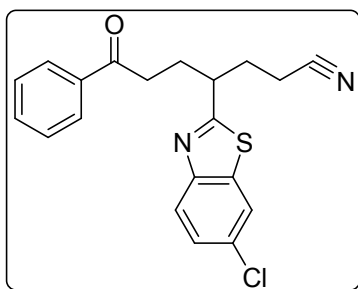

Brown oil:  $^1\text{H}$  NMR (400 MHz,  $\text{CDCl}_3$ )  $\delta$ : 7.98-7.96 (m, 1H), 7.91-7.86 (m, 3H), 7.47-7.42 (m, 4H), 3.47-3.40 (m, 1H), 3.05-3.01 (m, 2H), 2.47-2.41 (m, 2H); 2.36-2.22 (m, 4H);  $^{13}\text{C}$  NMR (100MHz,  $\text{CDCl}_3$ )  $\delta$ : 198.7, 173.1, 151.7, 136.5, 133.4, 133.3, 131.3, 129.1, 128.6, 127.9, 127.1, 123.7, 121.4, 43.1, 35.6, 31.3, 29.6, 26.3, 15.3. LRMS (EI 70 ev)  $m/z$  (%): 368 ( $\text{M}^+$ , 79); HRMS  $m/z$  (ESI) calcd for

$C_{20}H_{18}N_2OS$   $[M+H]^+$  369.0822, found 369.0824.

4-(6-methylbenzo[d]thiazol-2-yl)-7-oxo-7-phenylheptanenitrile (3aj):

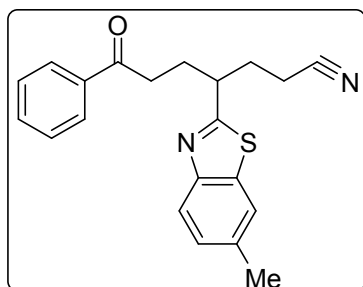

Yellow oil:  $^1H$  NMR (400 MHz,  $CDCl_3$ )  $\delta$ : 7.89-7.87 (m, 3H), 7.68 (s, 1H), 7.55 (dd,  $J = 7.2, 7.2$  Hz, 1H), 7.43 (dd,  $J = 7.6, 7.6$  Hz, 2H), 7.33 (d,  $J = 4.4$  Hz, 1H), 3.45-3.38 (m, 1H), 3.05-3.00 (m, 2H), 2.50 (s, 3H); 2.46-2.41 (m, 2H), 2.36-2.25 (m, 4H);  $^{13}C$  NMR (100MHz,  $CDCl_3$ )  $\delta$ : 198.9, 171.4, 151.2, 136.6, 135.4, 134.7, 133.2, 128.5, 127.9, 127.8, 122.4, 121.5, 119.0, 43.1, 35.7, 31.5, 29.7, 21.4, 15.3; LRMS (EI 70 ev)  $m/z$  (%): 348 ( $M^+$ , 100); HRMS  $m/z$  (ESI) calcd for  $C_{21}H_{21}N_2OS$   $[M+H]^+$  349.1369, found 349.1360.

7-oxo-7-phenyl-4-(pyridin-2-yl)heptanenitrile (3ak):

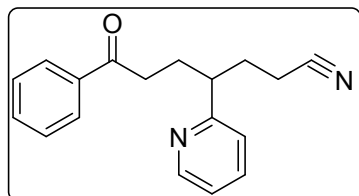

Yellow oil;  $^1H$  NMR (400 MHz,  $CDCl_3$ )  $\delta$ : 8.63(d,  $J = 3.6$  Hz, 1H), 8.00-7.94 (m, 2H), 7.82-7.78 (m, 1H), 7.73-7.71 (t,  $J = 8.8$  Hz, 1H), 7.59-7.52 (m, 2H), 7.47-7.42 (m, 2H), 3.25-3.17(m, 1H), 3.00-2.92 (m, 1H), 2.27-2.25 (m, 5H), 2.07-2.01 (m, 2H);  $^{13}C$  NMR (100MHz,  $CDCl_3$ )  $\delta$ : 200.4, 161.6, 149.0, 137.0, 136.8, 131.3, 129.4, 128.9, 128.6, 119.6, 45.4, 35.7, 30.9, 29.6, 15.1; LRMS (EI 70 ev)  $m/z$  (%): 278 ( $M^+$ , 100); HRMS  $m/z$  (ESI) calcd for  $C_{18}H_{19}N_2O$   $[M+H]^+$  279.1491, found 279.1484.

4-(1-methyl-1H-imidazol-2-yl)-7-oxo-7-phenylheptanenitrile (3al):

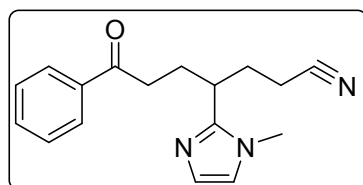

Pale yellow oil,  $^1H$  NMR (400 MHz,  $CDCl_3$ )  $\delta$ : 7.96 (d,  $J = 6.0$  Hz, 2H), 7.54-7.49 (m,



1H), 7.39-7.33 (m, 2H), 7.00 (d,  $J = 7.6$  Hz, 1H), 6.79 (d,  $J = 7.6$  Hz, 1H), 3.93 (s, 3H), 3.50-3.43 (m, 1H), 3.06-3.00 (m, 2H), 2.46-2.40 (m, 2H), 2.38-2.26 (m, 4H);  $^{13}\text{C}$  NMR (100 MHz,  $\text{CDCl}_3$ )  $\delta$ : 198.1, 148.3, 136.0, 132.6, 128.7, 128.0, 127.4, 119.9, 119.0, 42.8, 35.7, 31.4, 29.9, 29.0, 15.7; LRMS (EI 70 eV)  $m/z$  (%): 281 ( $\text{M}^+$ , 100); HRMS  $m/z$  (ESI) calcd for  $\text{C}_{17}\text{H}_{20}\text{N}_3\text{O}[\text{M}+\text{H}]^+$  282.1600, found 282.1605.

4-(benzo[d]thiazol-2-yl)-3,4-dimethyl-7-oxo-7-phenylheptanenitrile (3am):

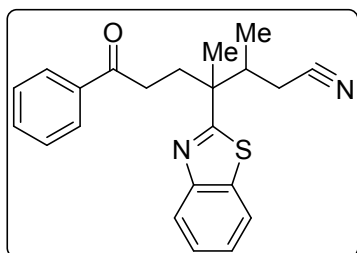

Yellow oil, (1:1.1 dr);  $^1\text{H}$  NMR (400 MHz,  $\text{CDCl}_3$ )  $\delta$ : 8.01 (d,  $J = 8.0$  Hz, 1H), 7.90-7.81 (m, 1H), 7.52-7.47 (m, 2H), 7.42-7.36, 2.95-2.90 (m, 1H), 2.87-2.63 (m, 2H), 2.43-2.35 (m, 2H), 2.31-2.18 (m, 2H), 1.54 (m, 1.4H), 1.50 (m, 1.6H), 1.29 (d,  $J = 6.8$  Hz, 1.6H), 1.15 (d,  $J = 6.8$  Hz, 1.4H);  $^{13}\text{C}$  NMR (100 MHz,  $\text{CDCl}_3$ )  $\delta$ : 199.3, 199.1, 177.1, 176.5, 152.8, 136.5, 133.2, 133.1, 128.5, 128.0, 127.9, 126.2, 126.1, 125.3, 125.2, 123.1, 123.0, 121.7, 121.6, 119.2, 46.8, 46.6, 41.0, 39.9, 35.0, 33.7, 33.4, 32.6, 21.0, 20.7, 20.3, 19.1, 15.2, 14.3. LRMS (EI 70 eV)  $m/z$  (%): 362 ( $\text{M}^+$ , 100); HRMS  $m/z$  (ESI) calcd for  $\text{C}_{22}\text{H}_{23}\text{N}_2\text{OS}[\text{M}+\text{H}]^+$  363.1525, found 363.1529.

4-(benzo[d]thiazol-2-yl)-2-methyl-7-oxo-7-phenylheptanenitrile (3ba):

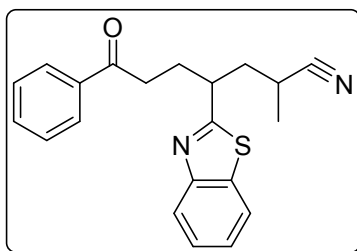

Yellow oil; (1:1 dr);  $^1\text{H}$  NMR (400 MHz,  $\text{CDCl}_3$ )  $\delta$ : 7.99 (dd,  $J = 4.0$  Hz,  $J = 4.0$  Hz, 1H), 7.86 (t,  $J = 3.6$  Hz, 2H), 7.51-7.45 (m, 3H), 7.41 (t,  $J = 6.0$  Hz, 2H), 3.58-3.51 (m, 0.5H), 3.49-3.44 (m, 0.5H), 3.06-2.92 (m, 2H), 2.73-2.69 (m, 0.5H), 2.59-2.55 (m, 0.5H), 2.33-2.28 (m, 2H), 2.20-2.15 (m, 5H);  $^{13}\text{C}$  NMR (100 MHz,  $\text{CDCl}_3$ )  $\delta$ : 198.8, 198.7, 172.9, 172.7, 153.1, 136.4, 134.4, 133.14, 133.11, 129.2, 128.6, 128.4, 127.8,

126.1, 125.19, 125.14, 122.8, 122.2, 121.7, 121.6, 42.2, 41.4, 40.1, 39.7, 35.6, 35.5, 30.8, 30.3, 23.9, 23.0, 18.3, 17.5; LRMS (EI 70 ev) m/z (%): 348 (M<sup>+</sup>, 100); HRMS m/z (ESI) calcd for C<sub>22</sub>H<sub>21</sub>N<sub>2</sub>OS[M+H]<sup>+</sup> 349.1369, found 349.1365.

4-(benzo[d]thiazol-2-yl)-8-oxo-8-phenyloctanenitrile (5aa):

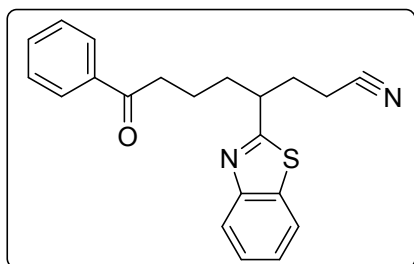

Yellow oil; <sup>1</sup>H NMR (400 MHz, CDCl<sub>3</sub>) δ: 7.97 (d, *J*=8.0, 1H), 7.90-7.84 (m, 3H), 7.46-7.35 (m, 5H), 3.38-3.31 (m, 1H), 3.05-2.91 (m, 2H), 2.43-2.33 (m, 2H), 2.25-2.18 (m, 2H), 1.93-1.78(m, 4H); <sup>13</sup>C NMR (100MHz, CDCl<sub>3</sub>) δ: 199.4, 171.1, 153.0, 136.7, 134.5, 133.0, 128.5, 127.9, 126.1, 125.1, 122.8, 121.7, 119.1, 43.6, 37.8, 35.1, 31.0, 21.5, 14.1; LRMS (EI 70 ev) m/z (%): 348 (M<sup>+</sup>, 100); HRMS m/z (ESI) calcd for C<sub>21</sub>H<sub>21</sub>N<sub>2</sub>OS[M+H]<sup>+</sup> 349.1369, found 349.1365.

(E) Copies of  $^1\text{H}$  and  $^{13}\text{C}$  NMR Spectra

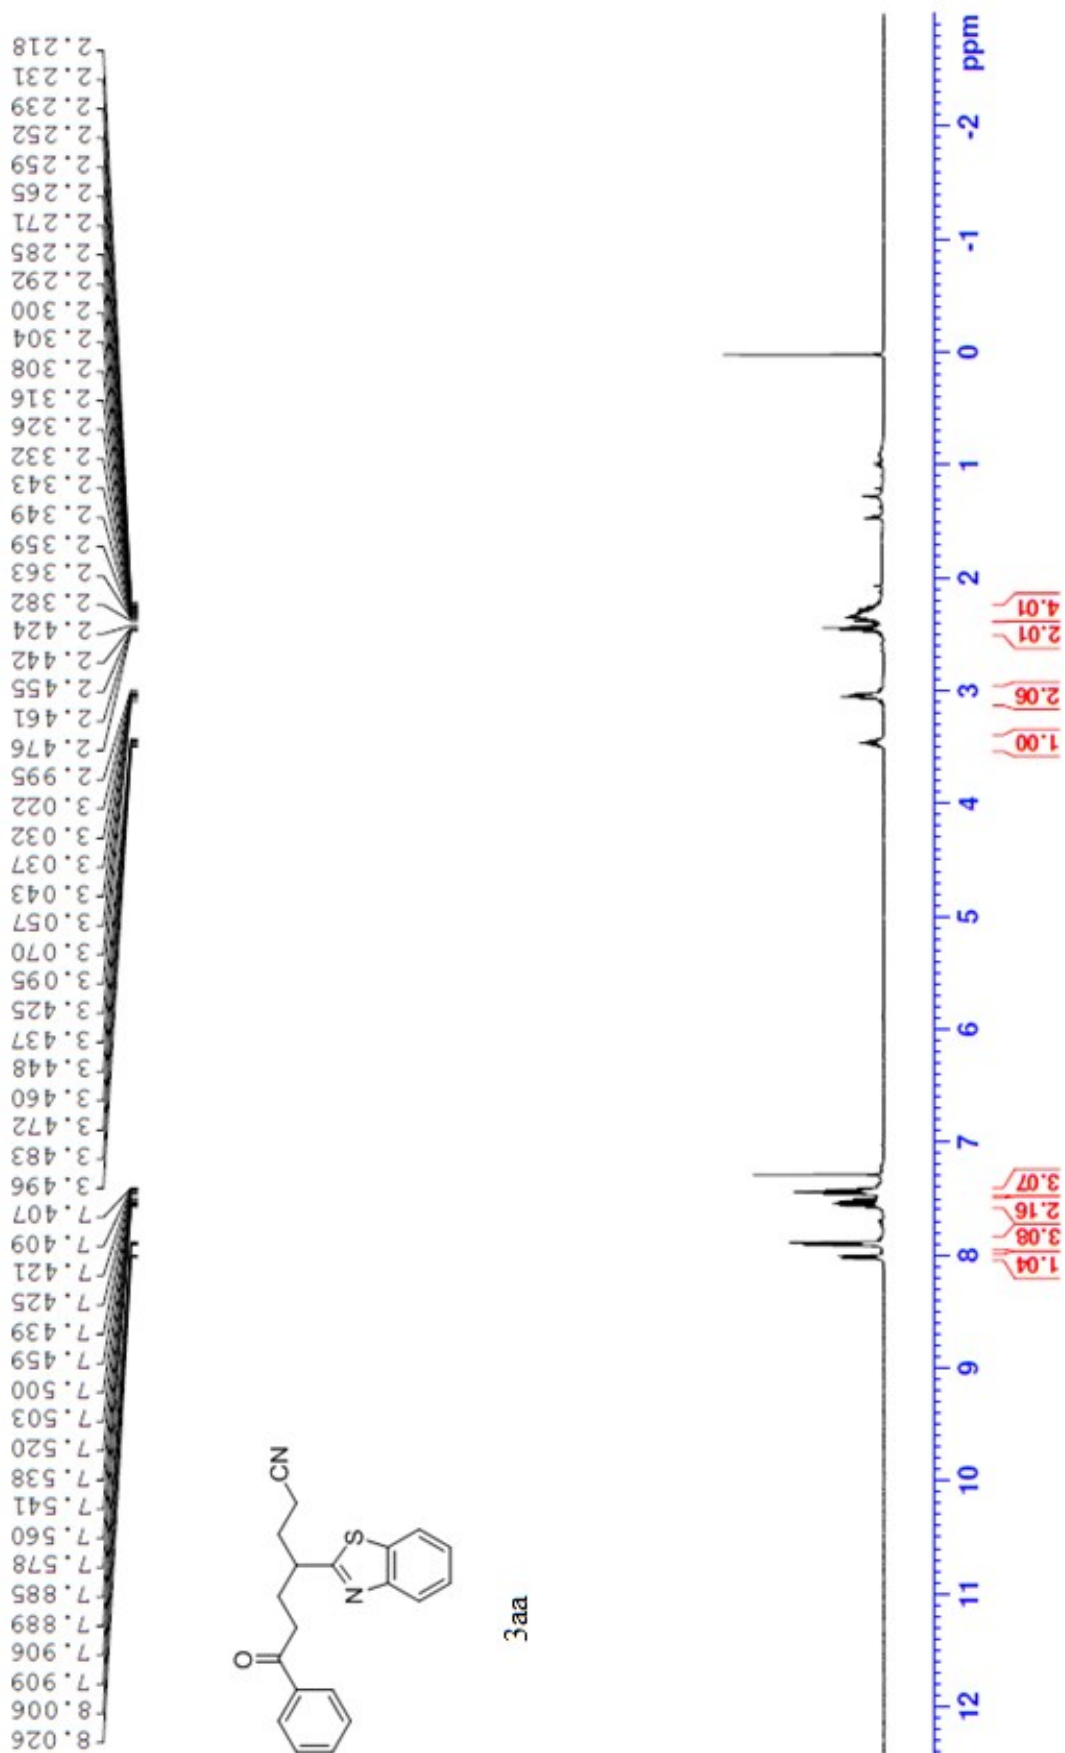

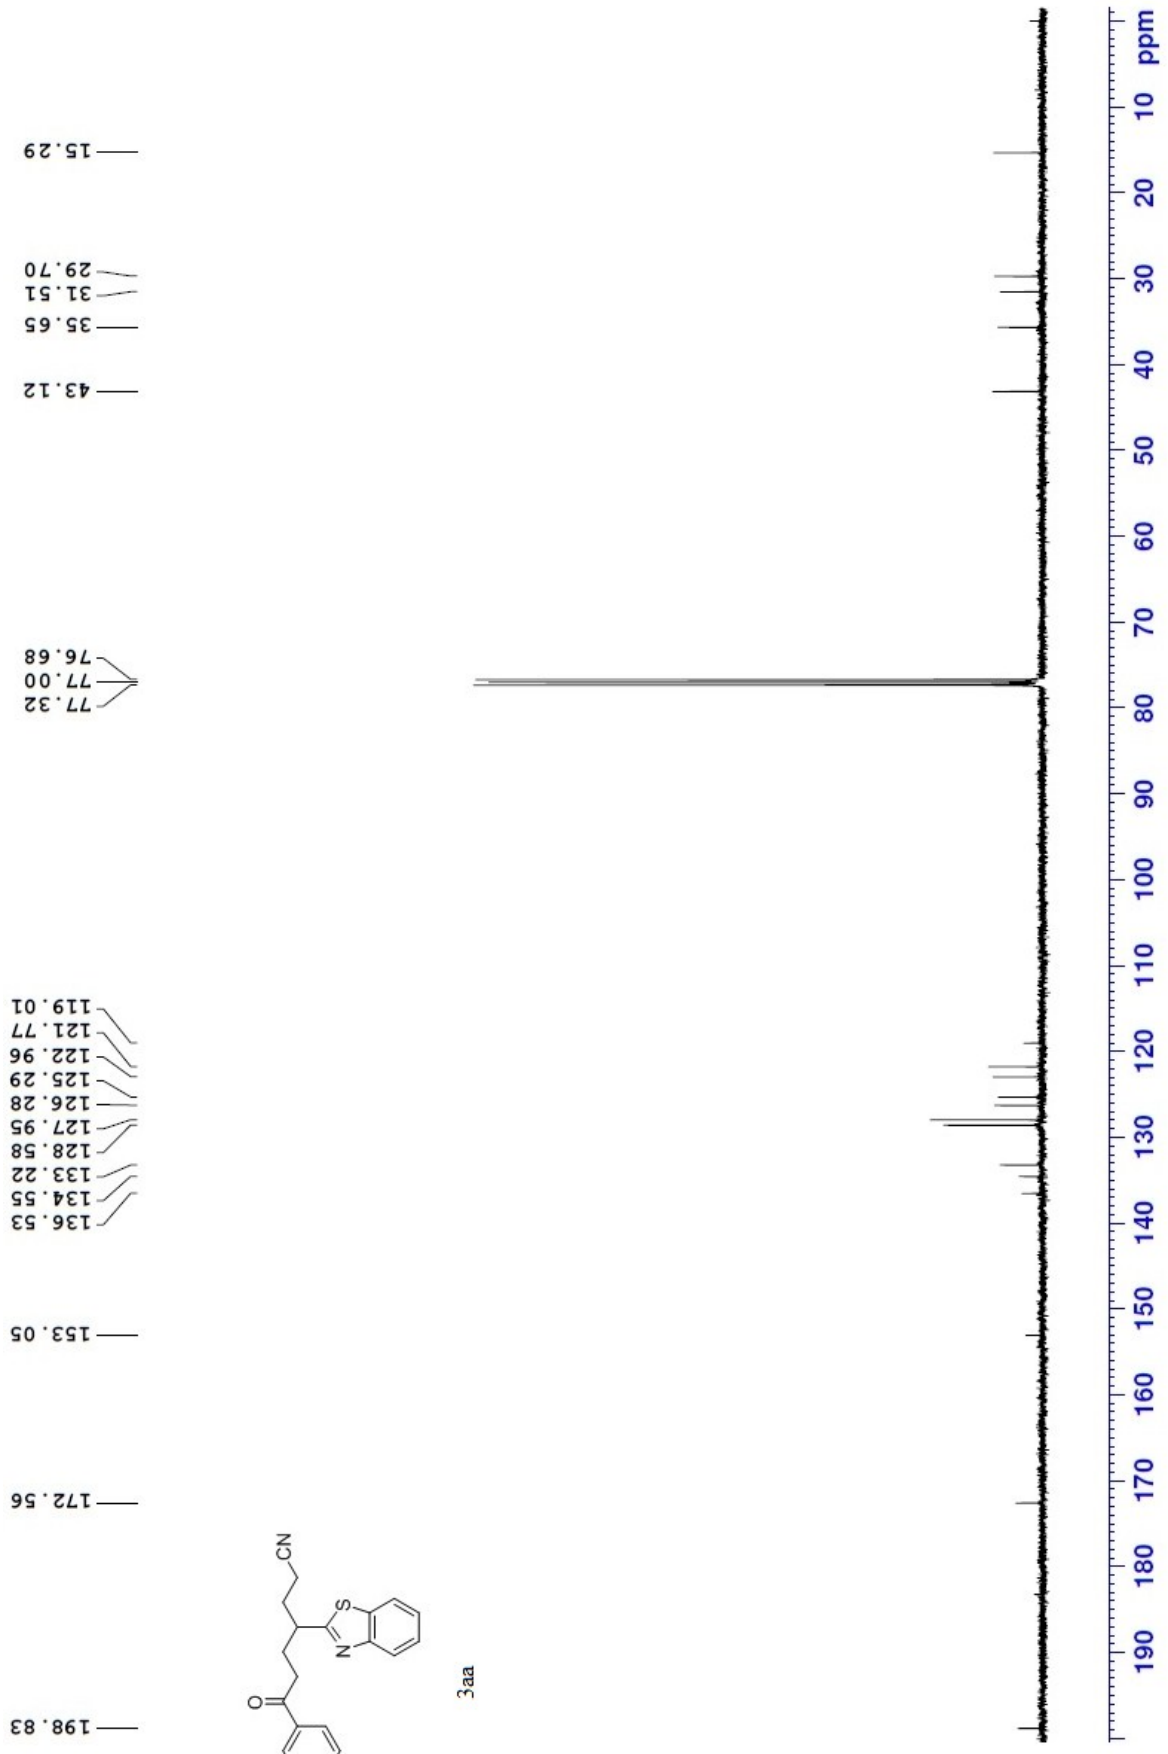

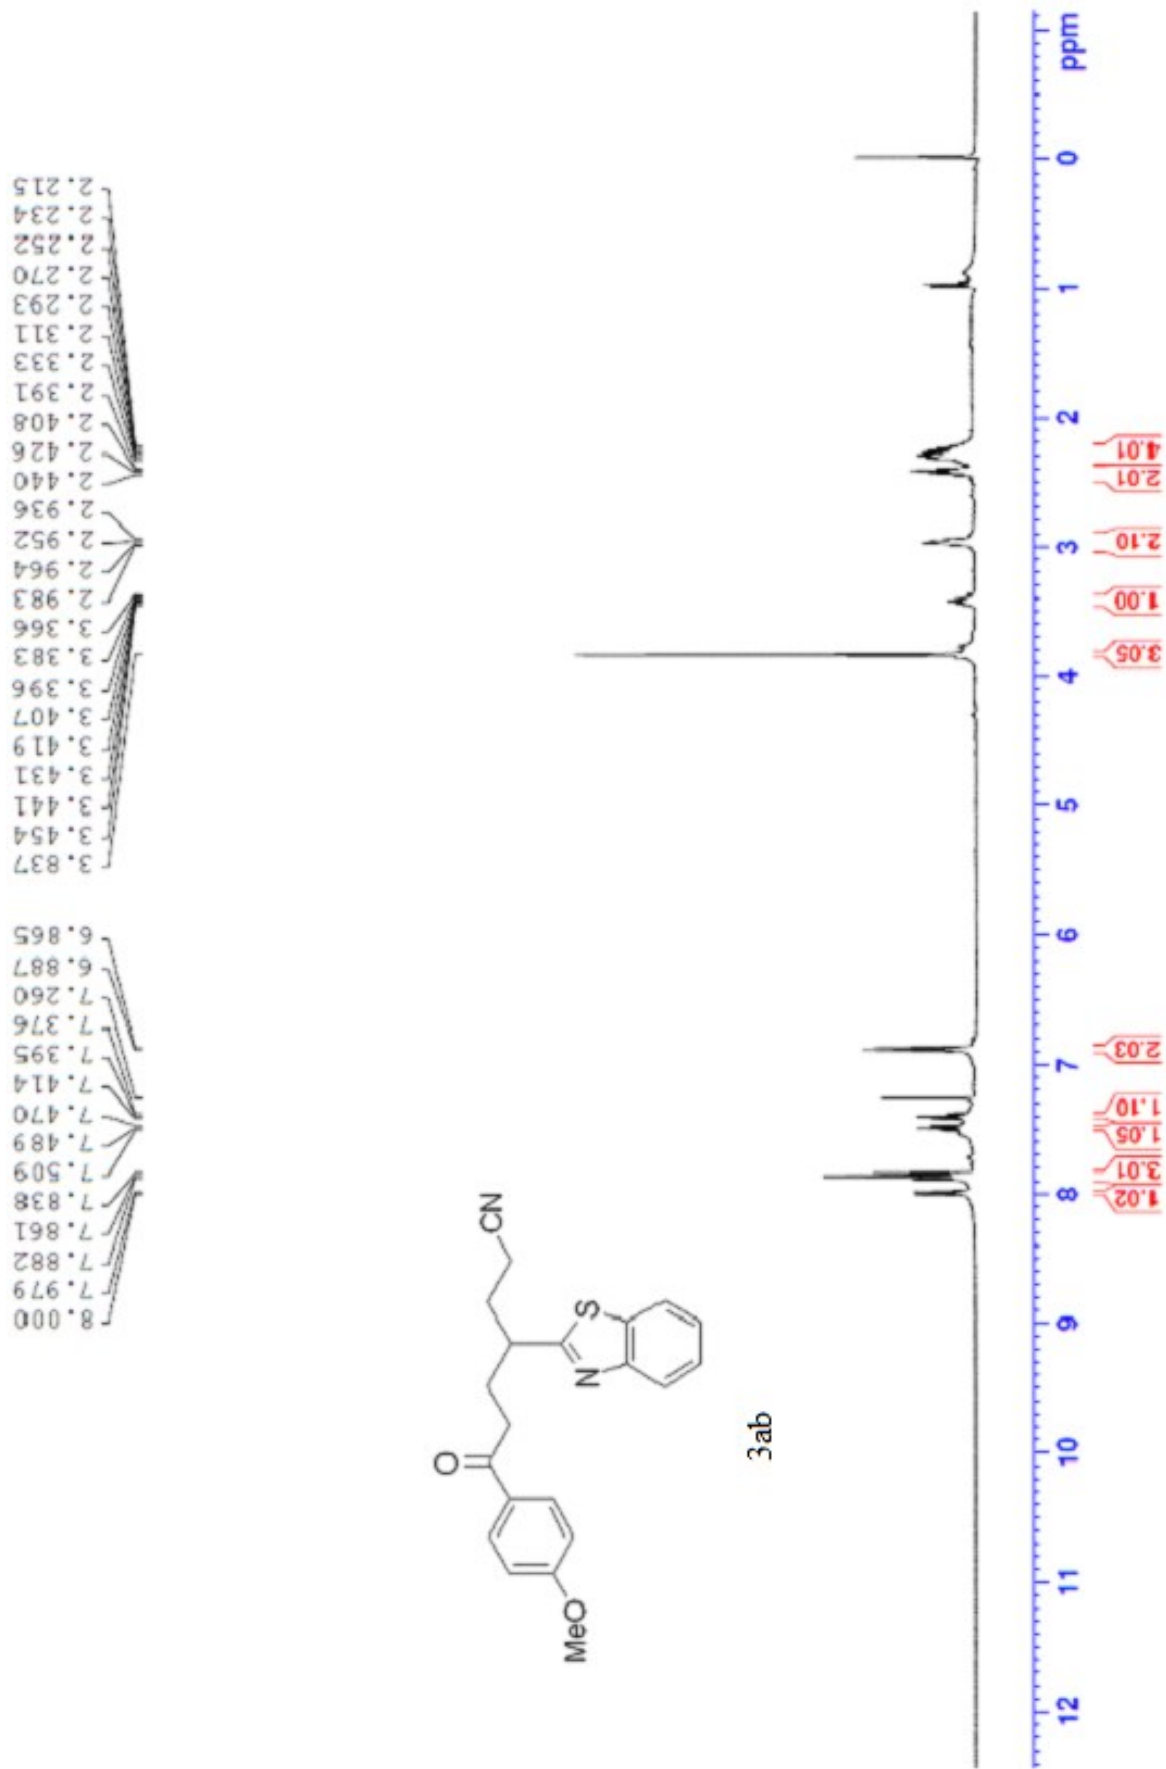

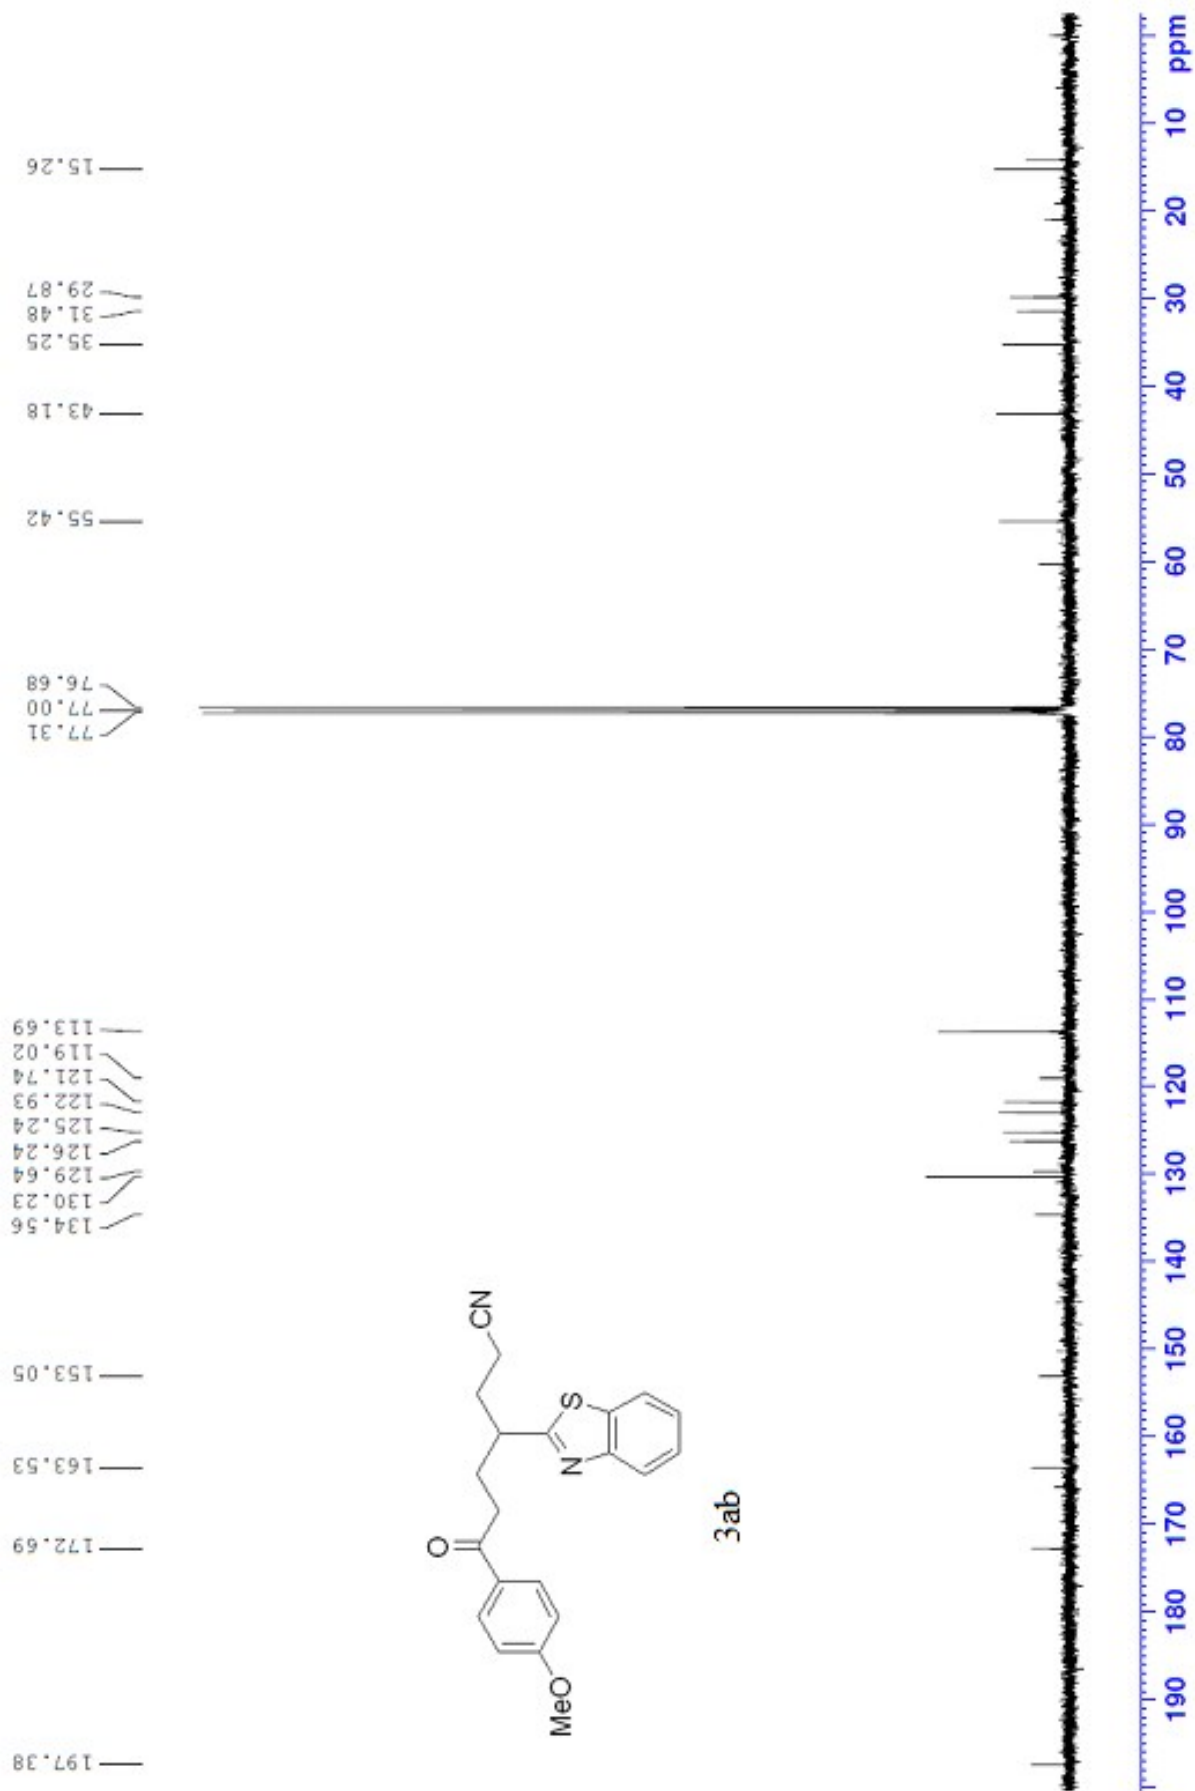

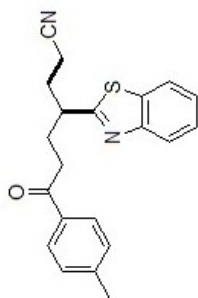

3ac

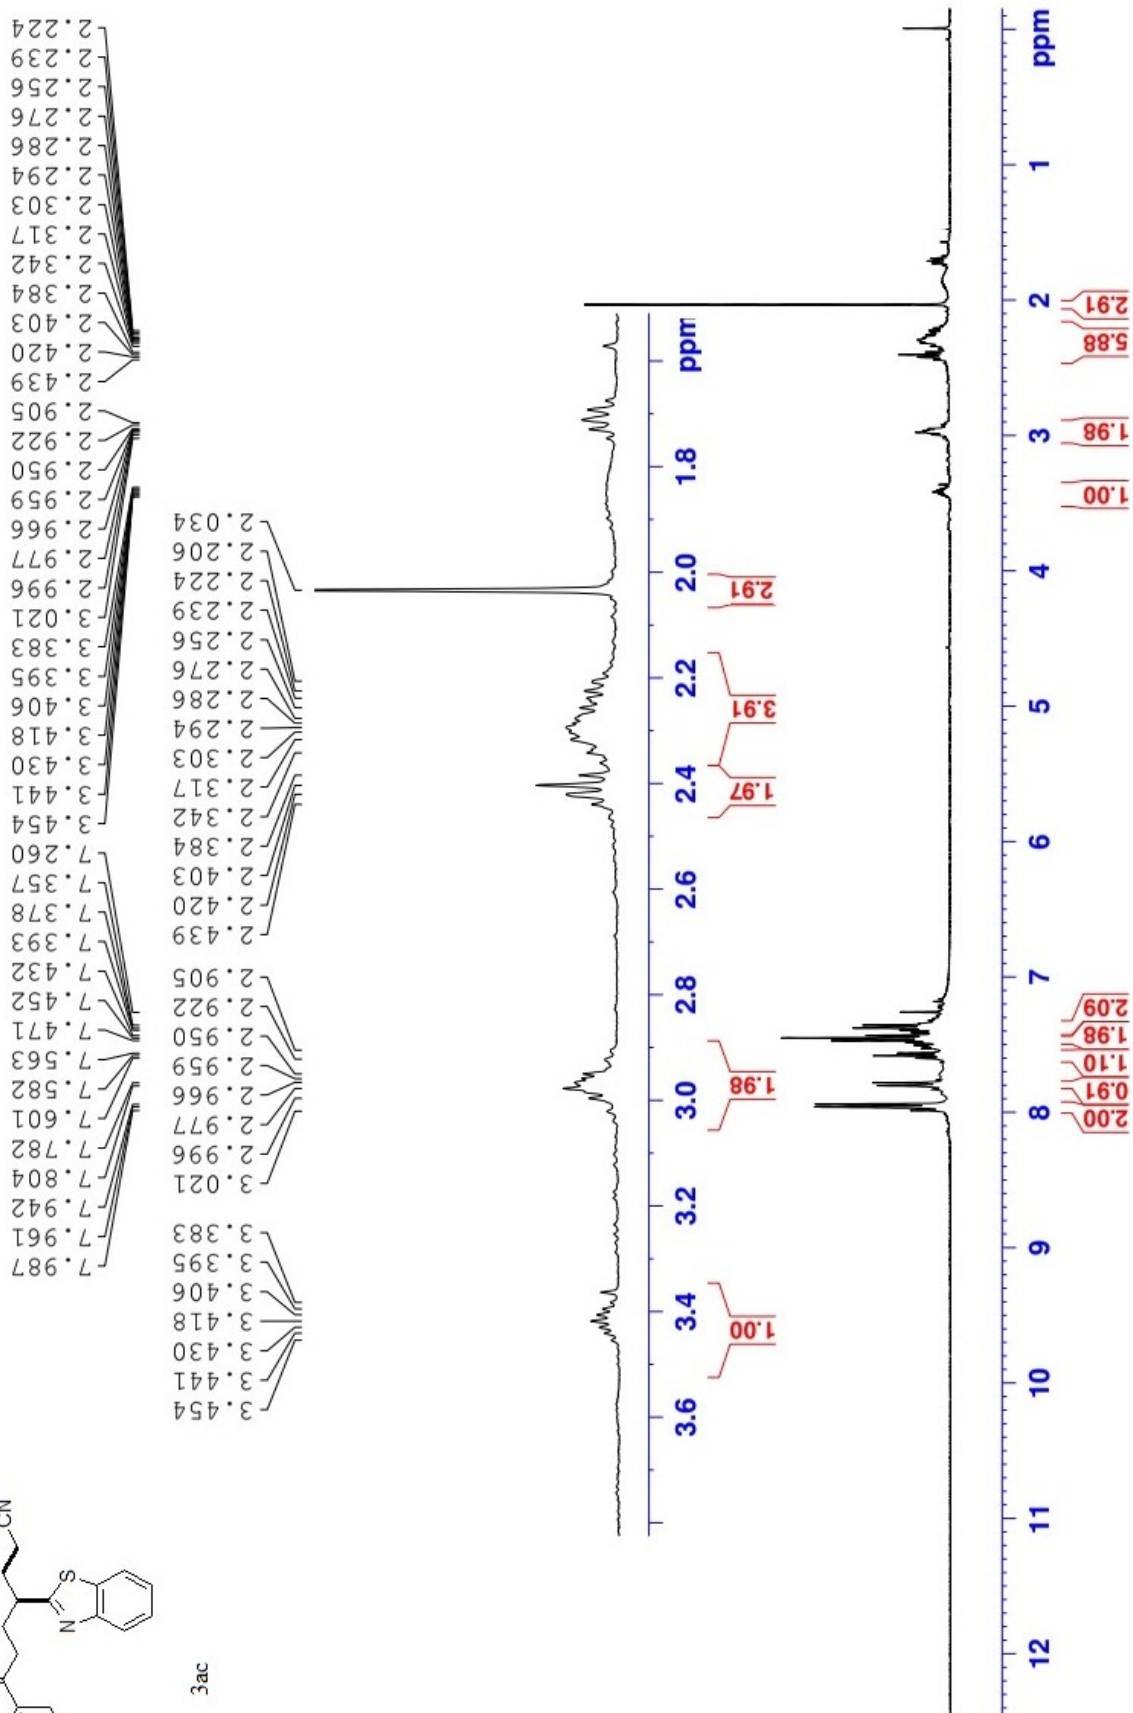

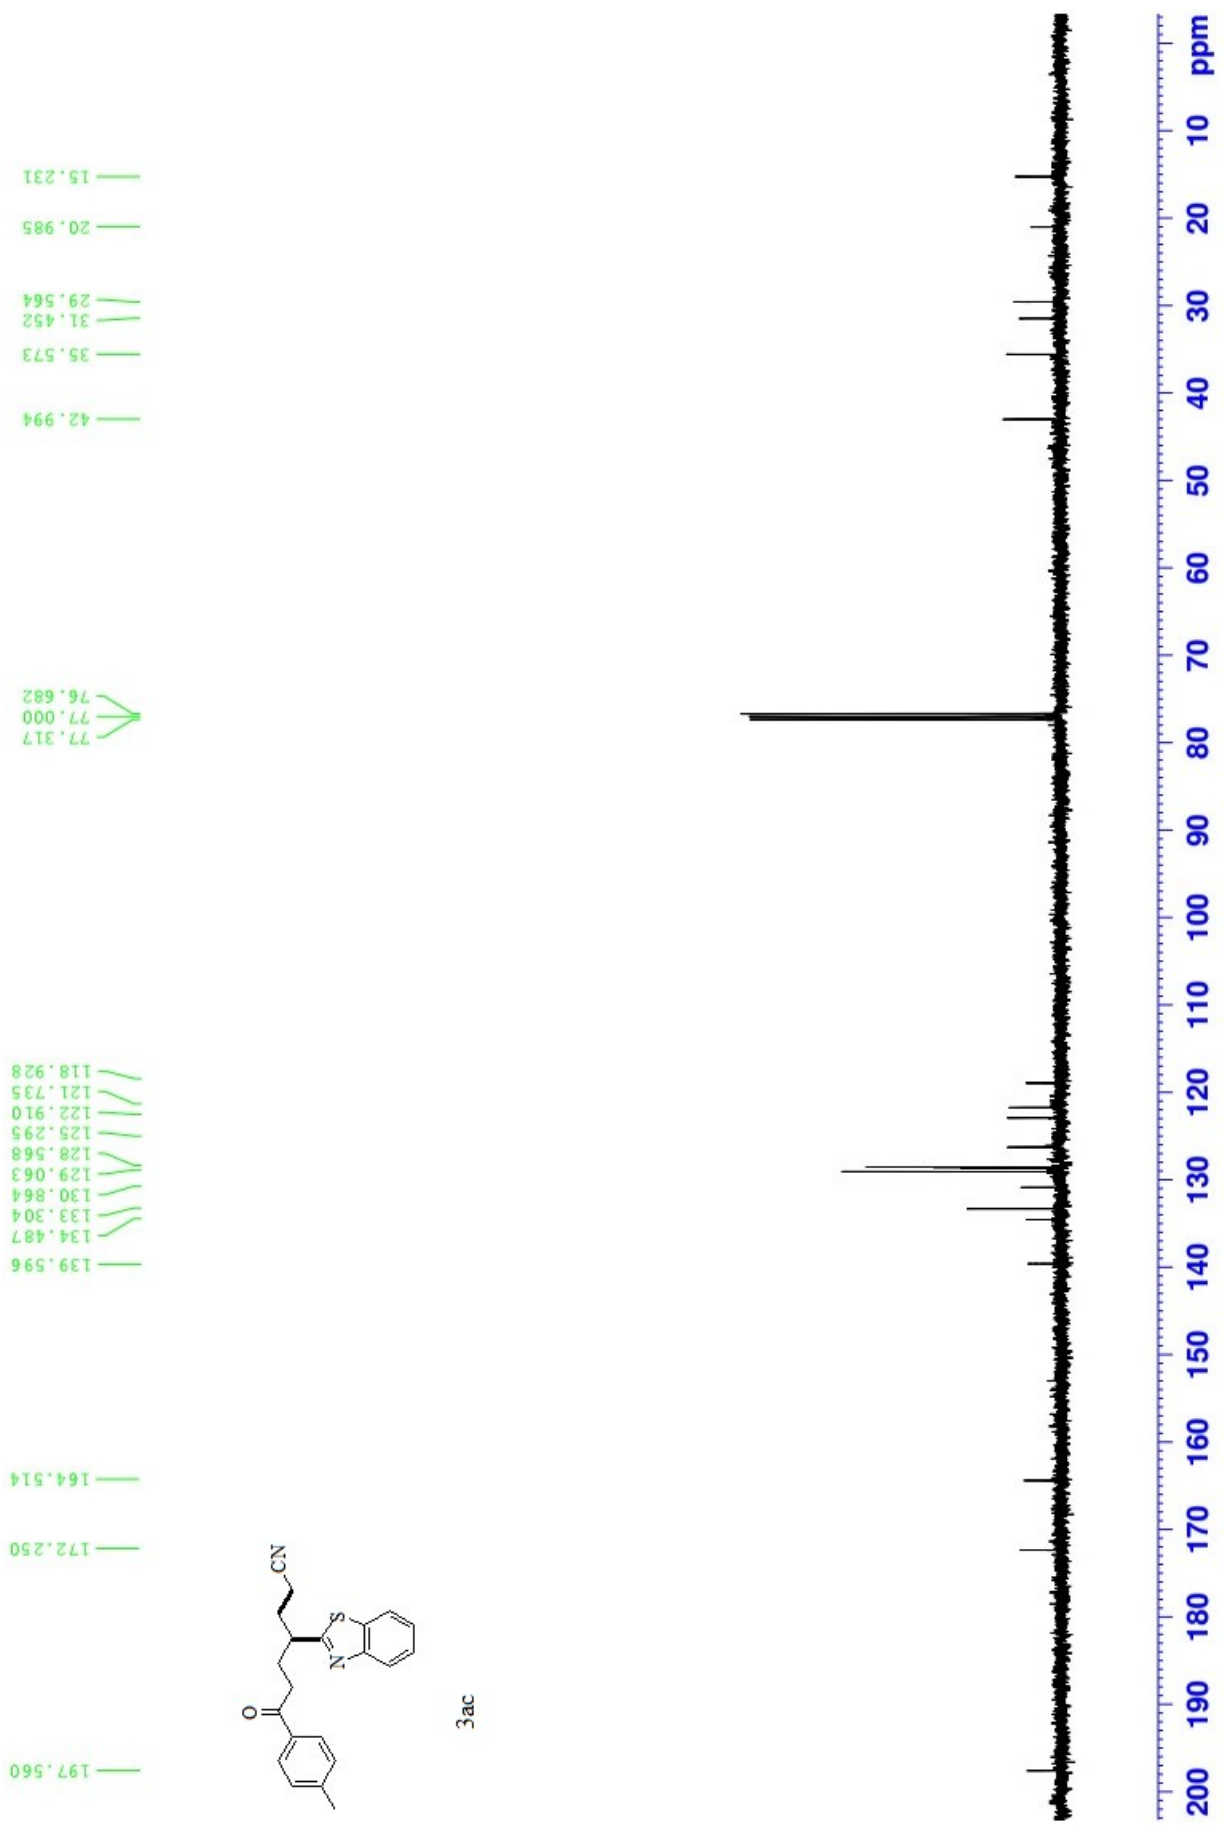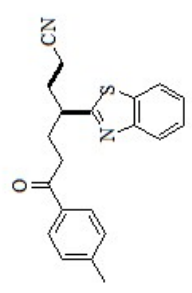

3ac



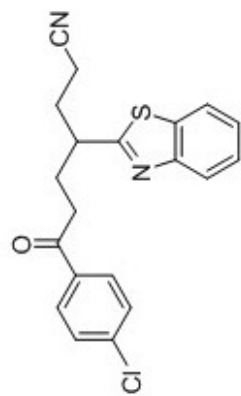

3ad

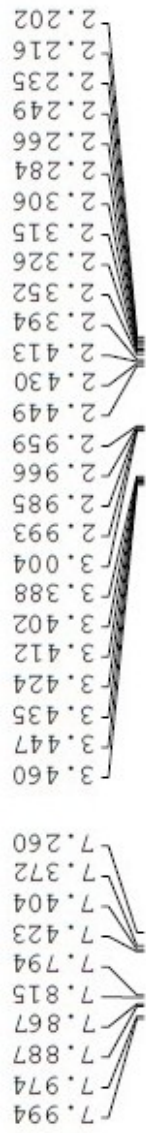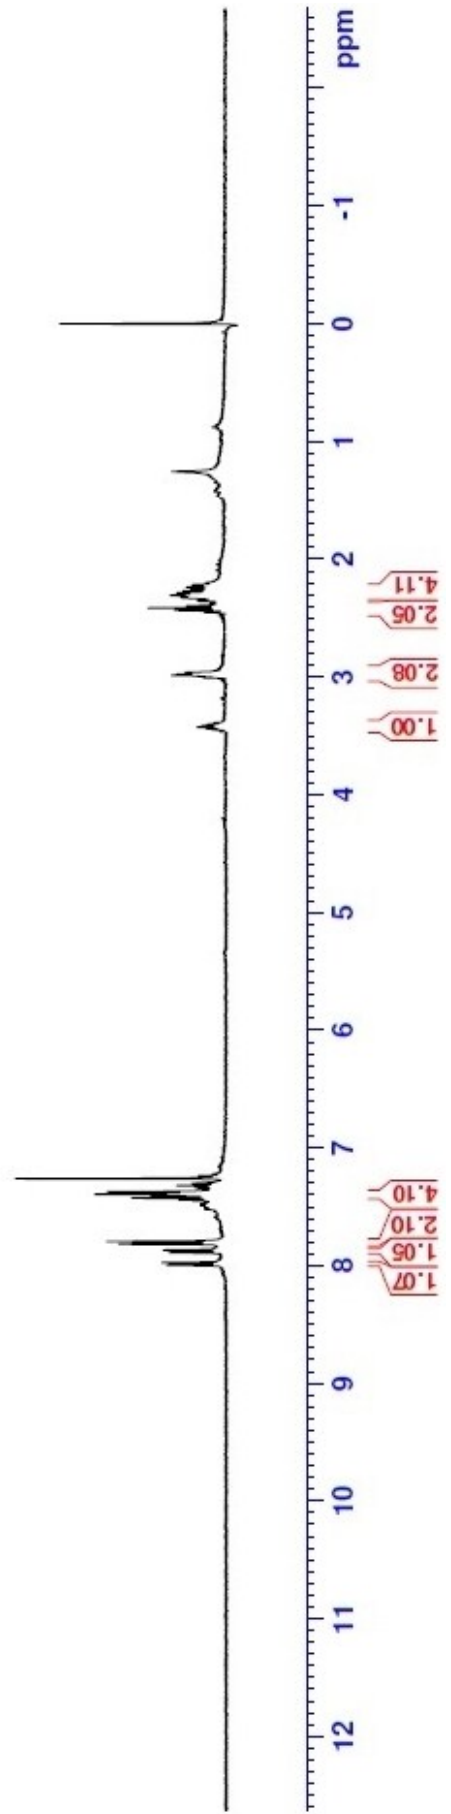

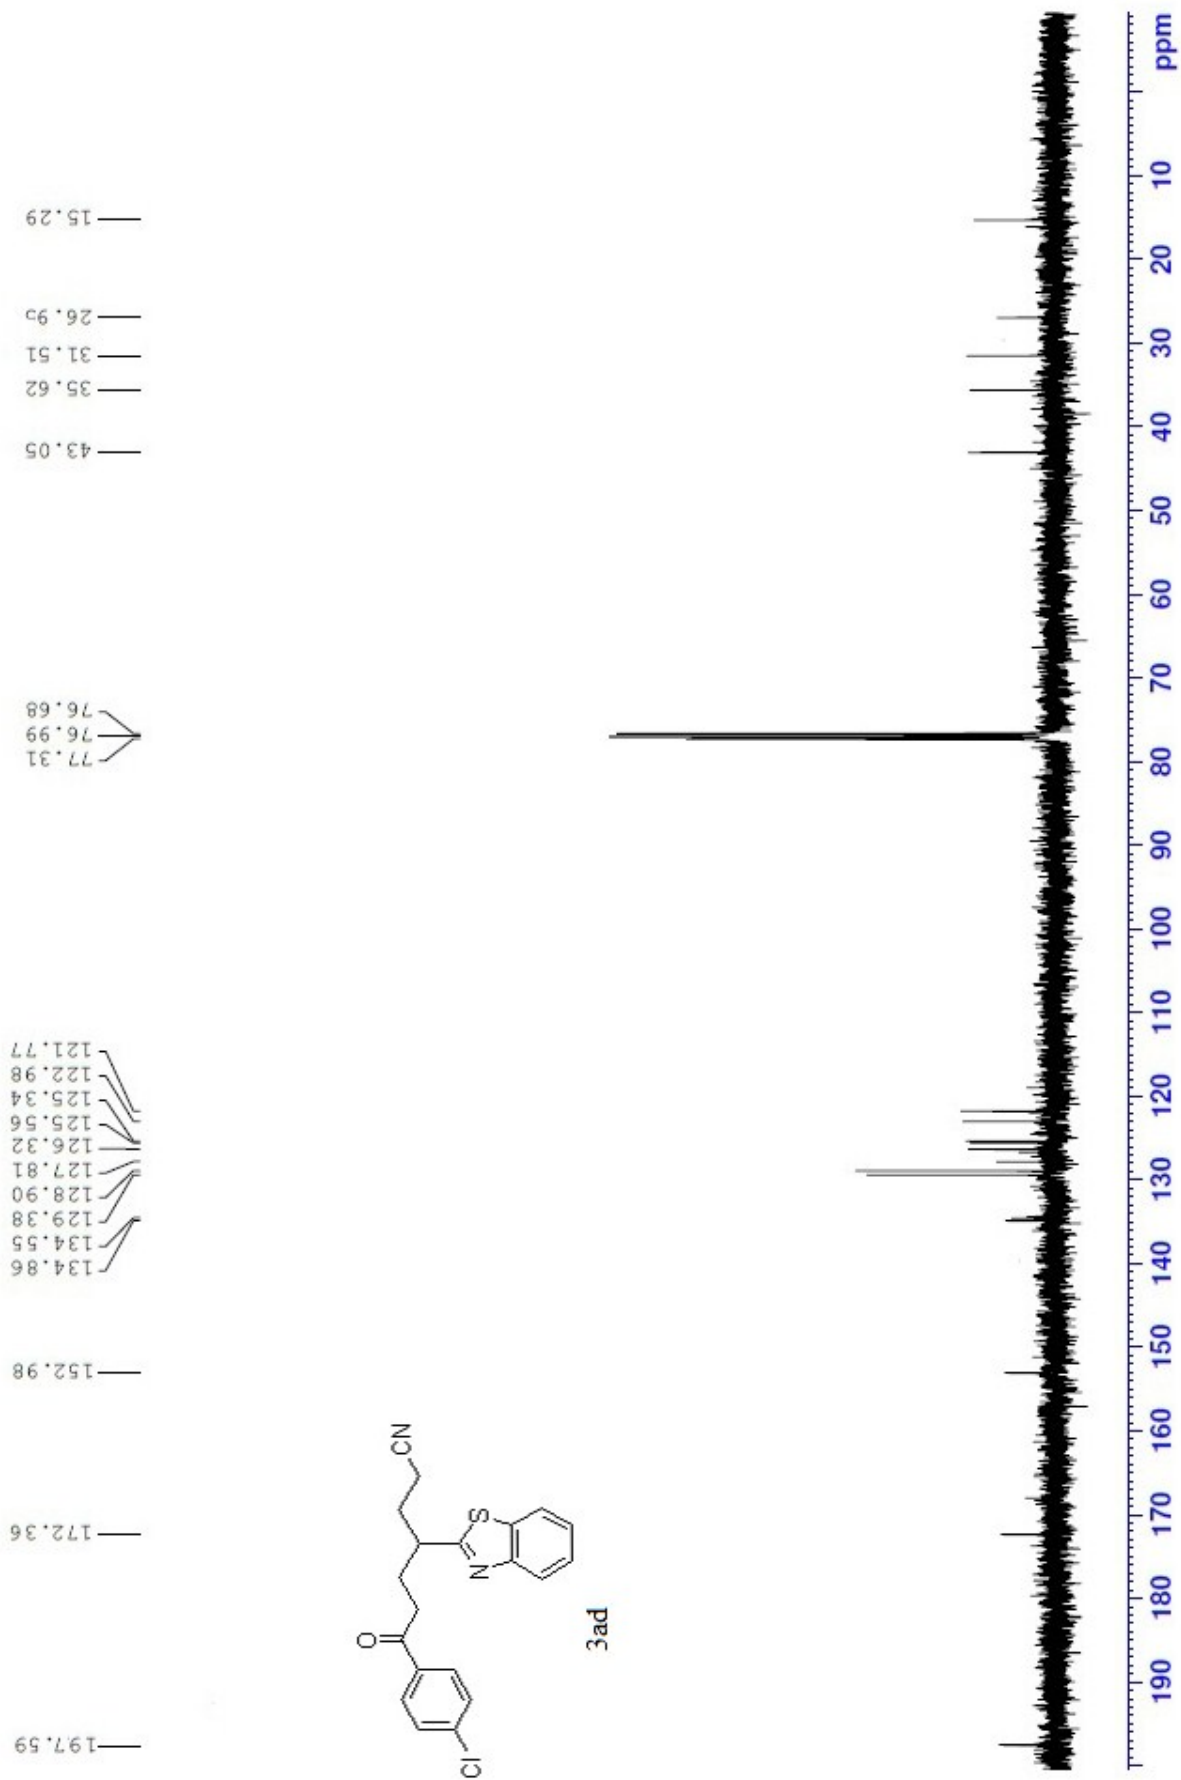

3.485  
 3.472  
 3.456  
 3.437  
 3.378  
 3.359  
 3.338  
 3.319  
 3.291  
 2.442  
 2.438  
 2.423  
 2.404  
 2.384  
 2.366  
 2.348  
 2.321  
 2.302  
 2.285  
 2.272

8.109  
 8.089  
 7.974  
 7.954  
 7.936  
 7.541  
 7.524  
 7.520  
 7.504  
 7.487  
 7.469  
 7.260

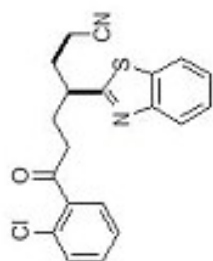

3ae

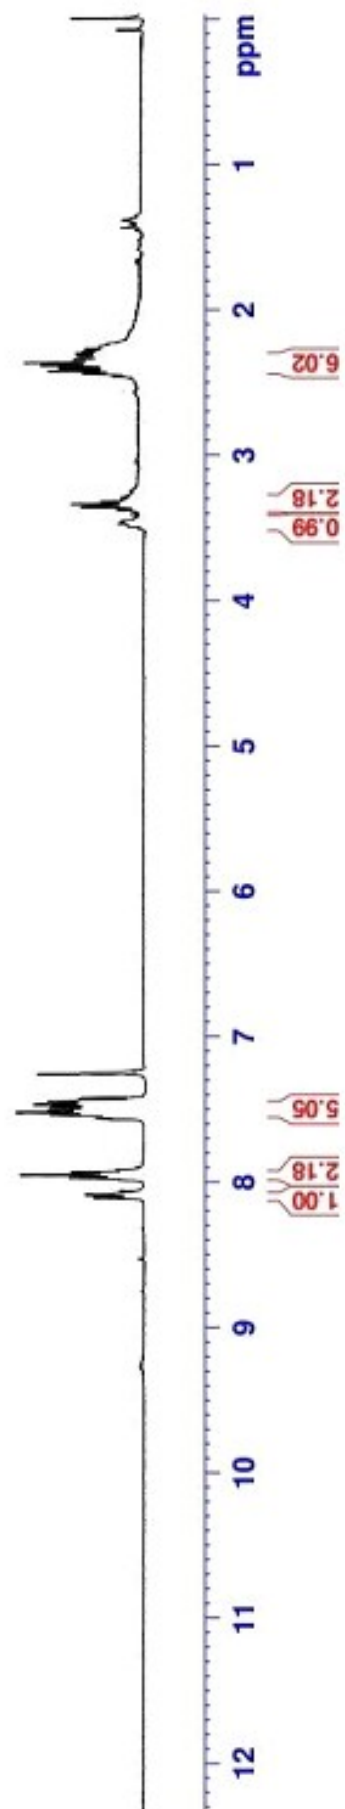

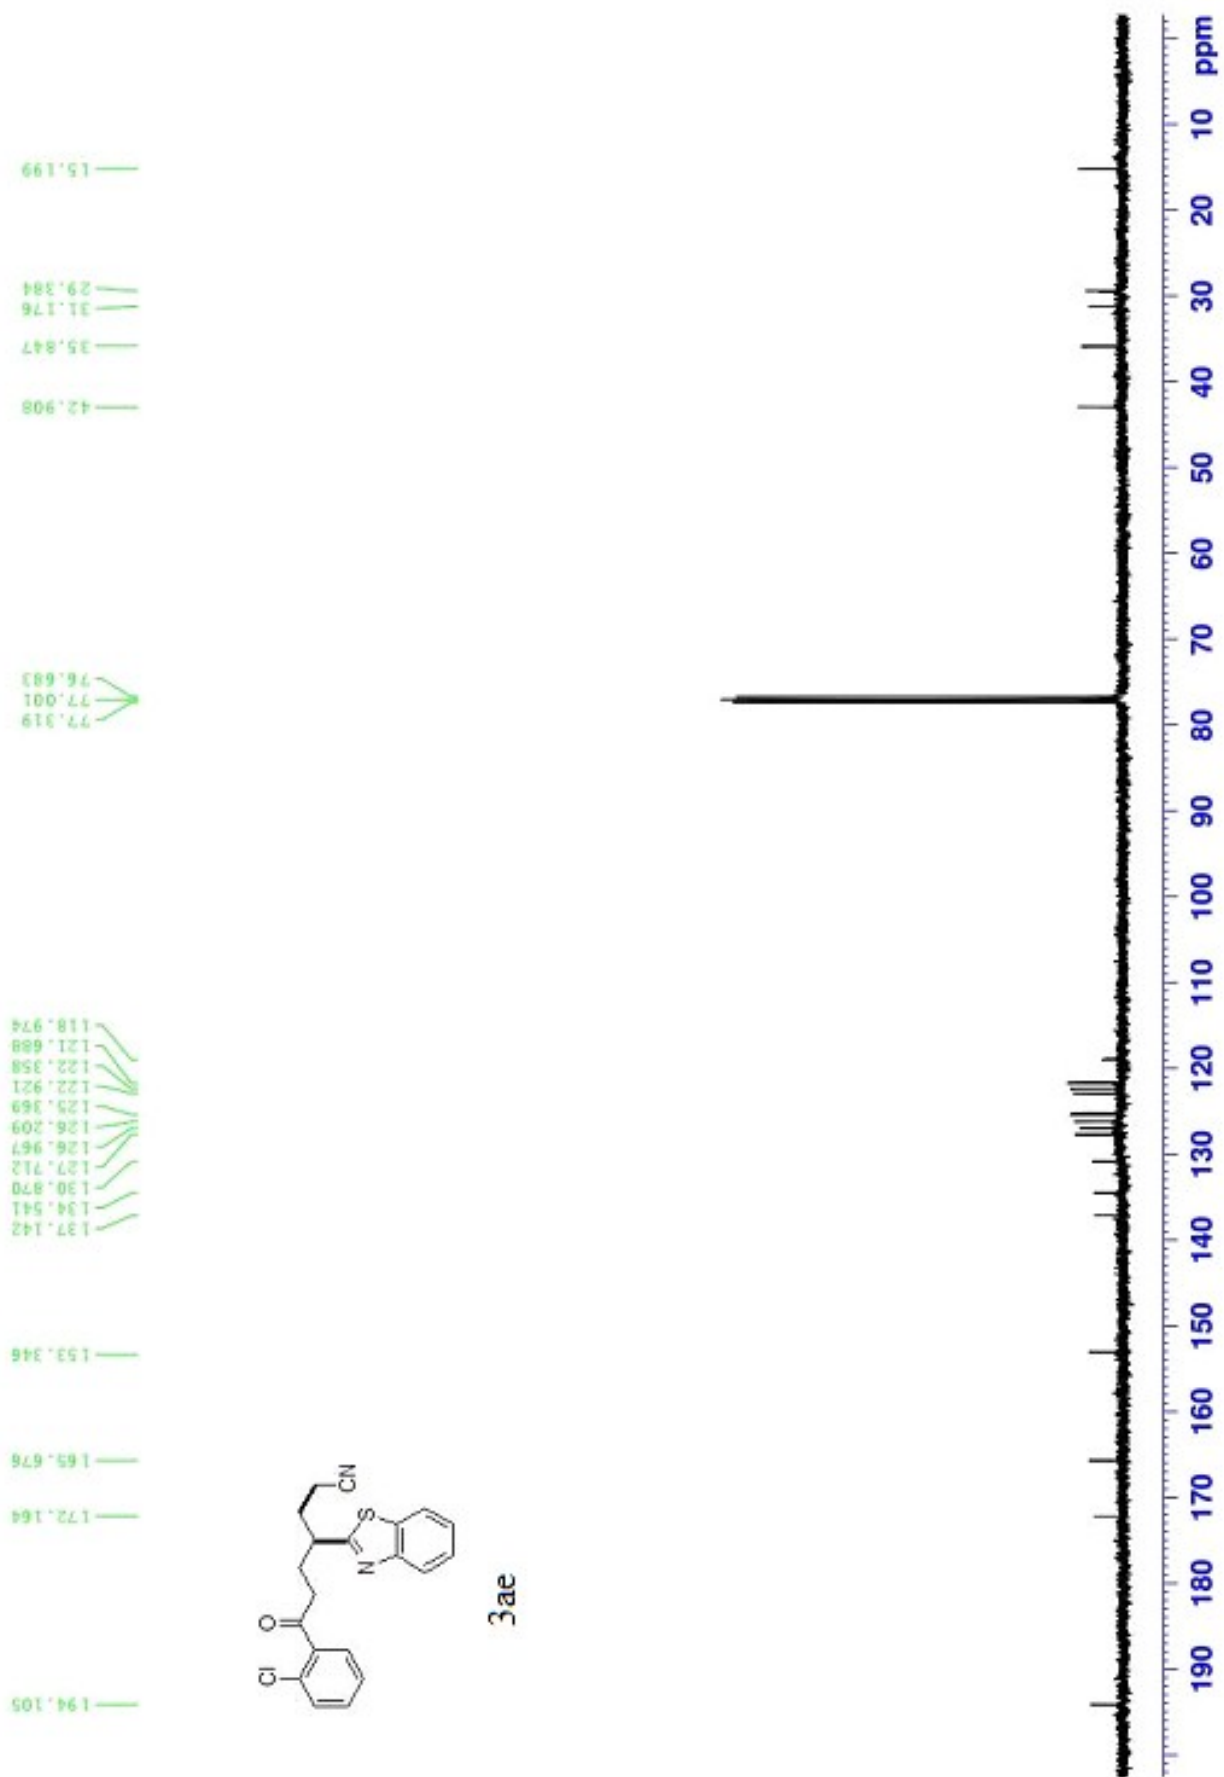

8.357  
 8.075  
 8.059  
 7.992  
 7.983  
 7.969  
 7.950  
 7.905  
 7.894  
 7.873  
 7.865  
 7.843  
 7.811  
 7.607  
 7.593  
 7.574  
 7.563  
 7.551  
 7.514  
 7.500  
 7.483  
 7.463  
 7.444  
 7.398  
 7.380  
 7.260  
 3.509  
 3.504  
 3.495  
 3.482  
 3.471  
 3.458  
 3.450  
 3.186  
 3.169  
 3.151  
 3.137  
 3.129  
 2.469  
 2.454  
 2.438  
 2.422  
 2.403  
 2.398  
 2.363  
 2.329  
 2.307  
 2.288  
 2.273  
 2.257

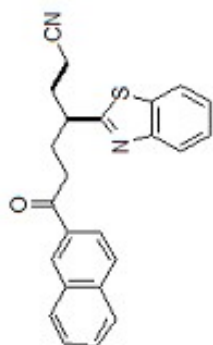

3af

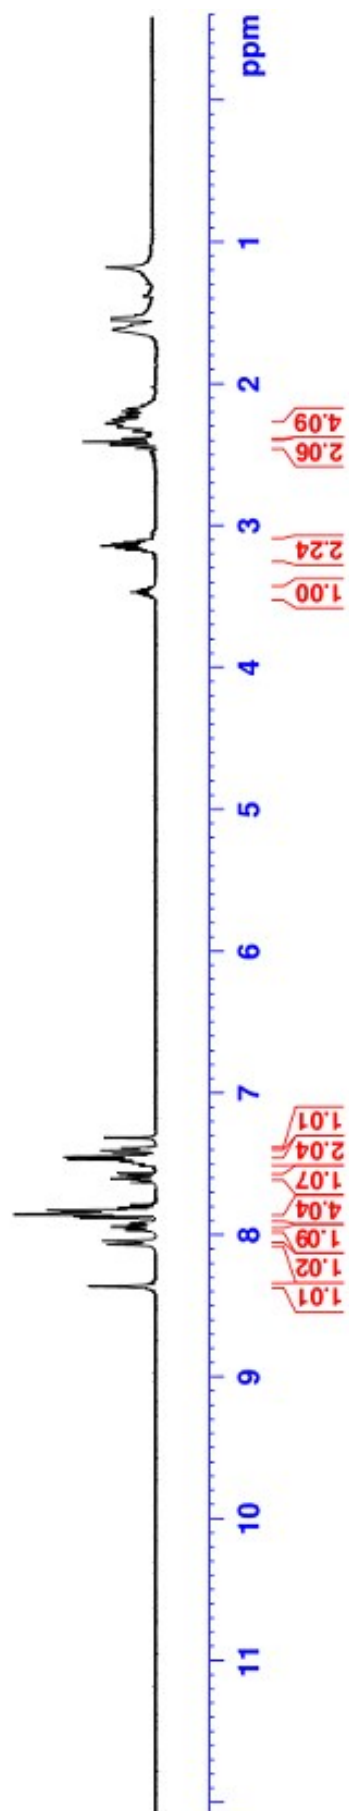

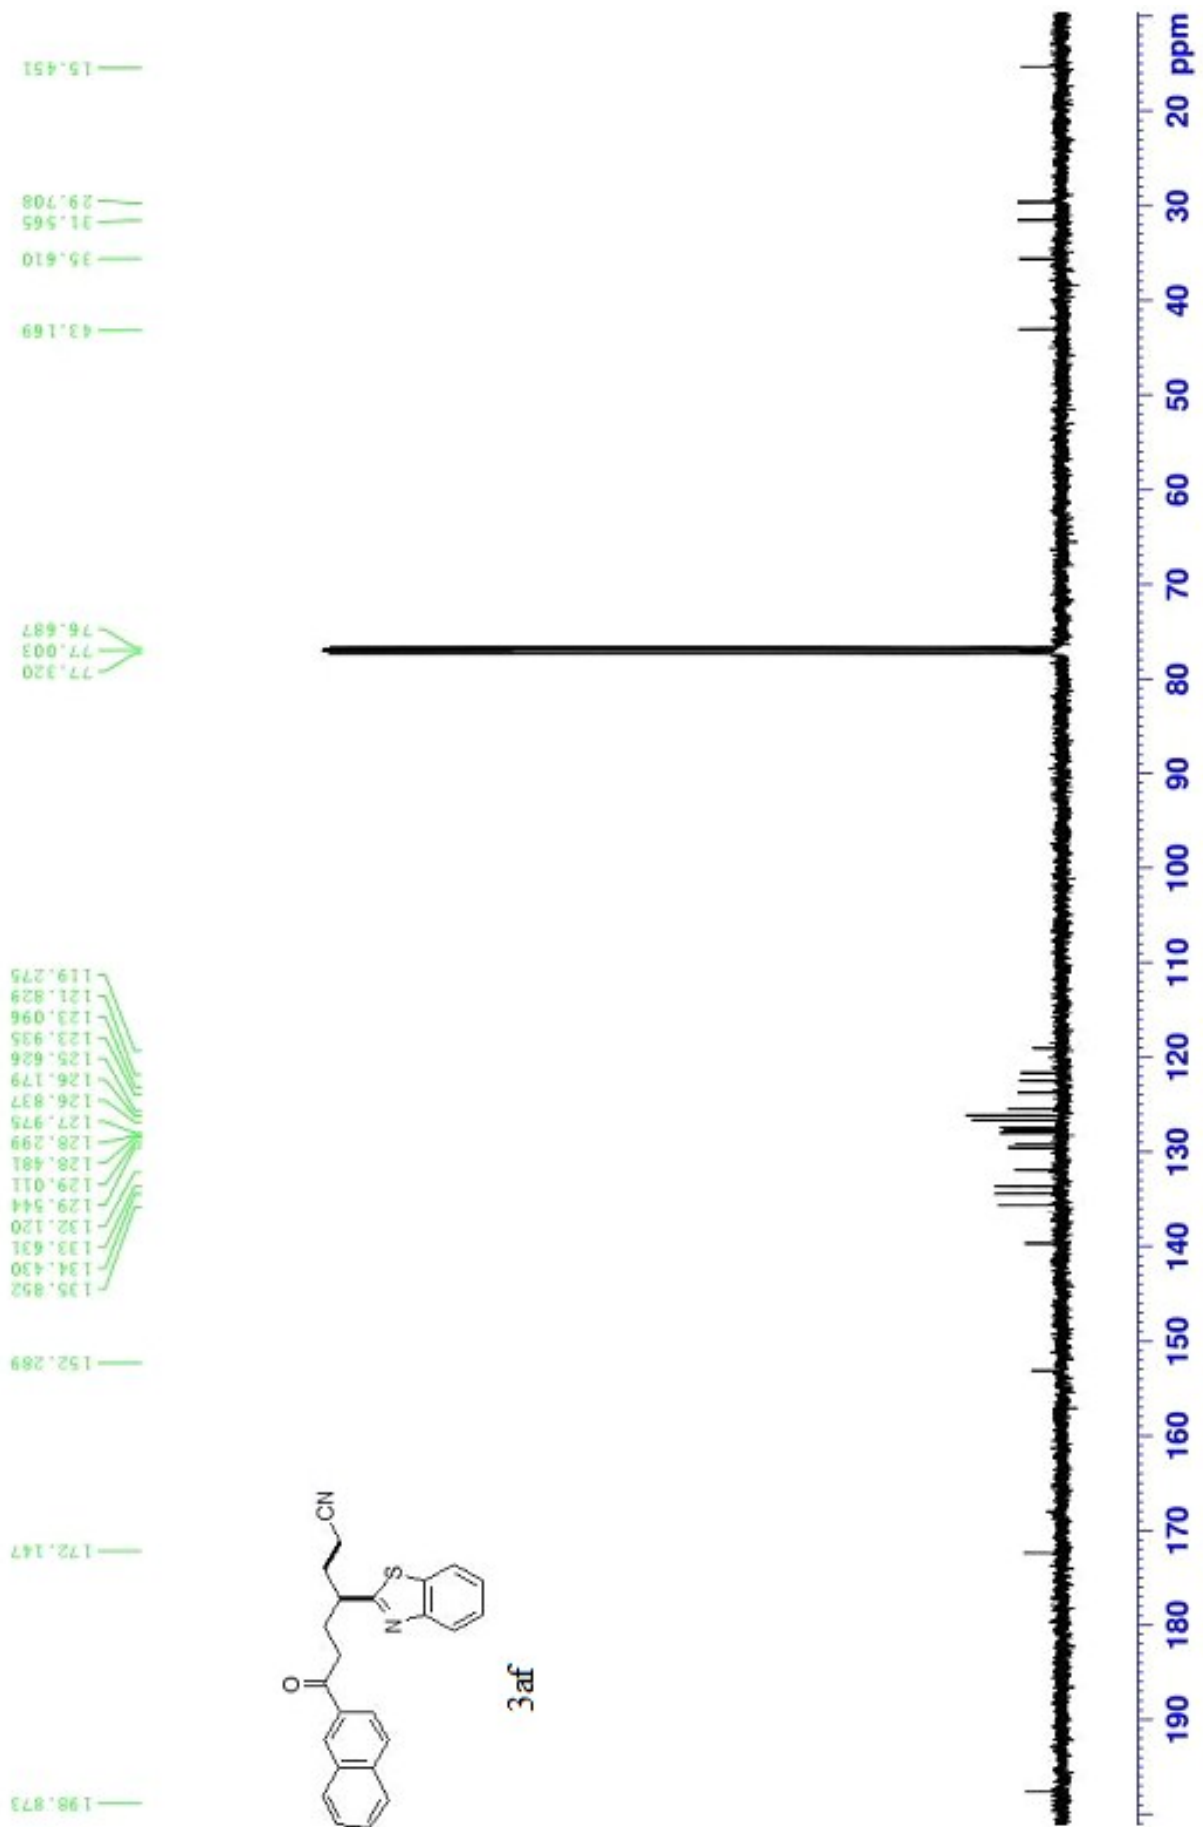

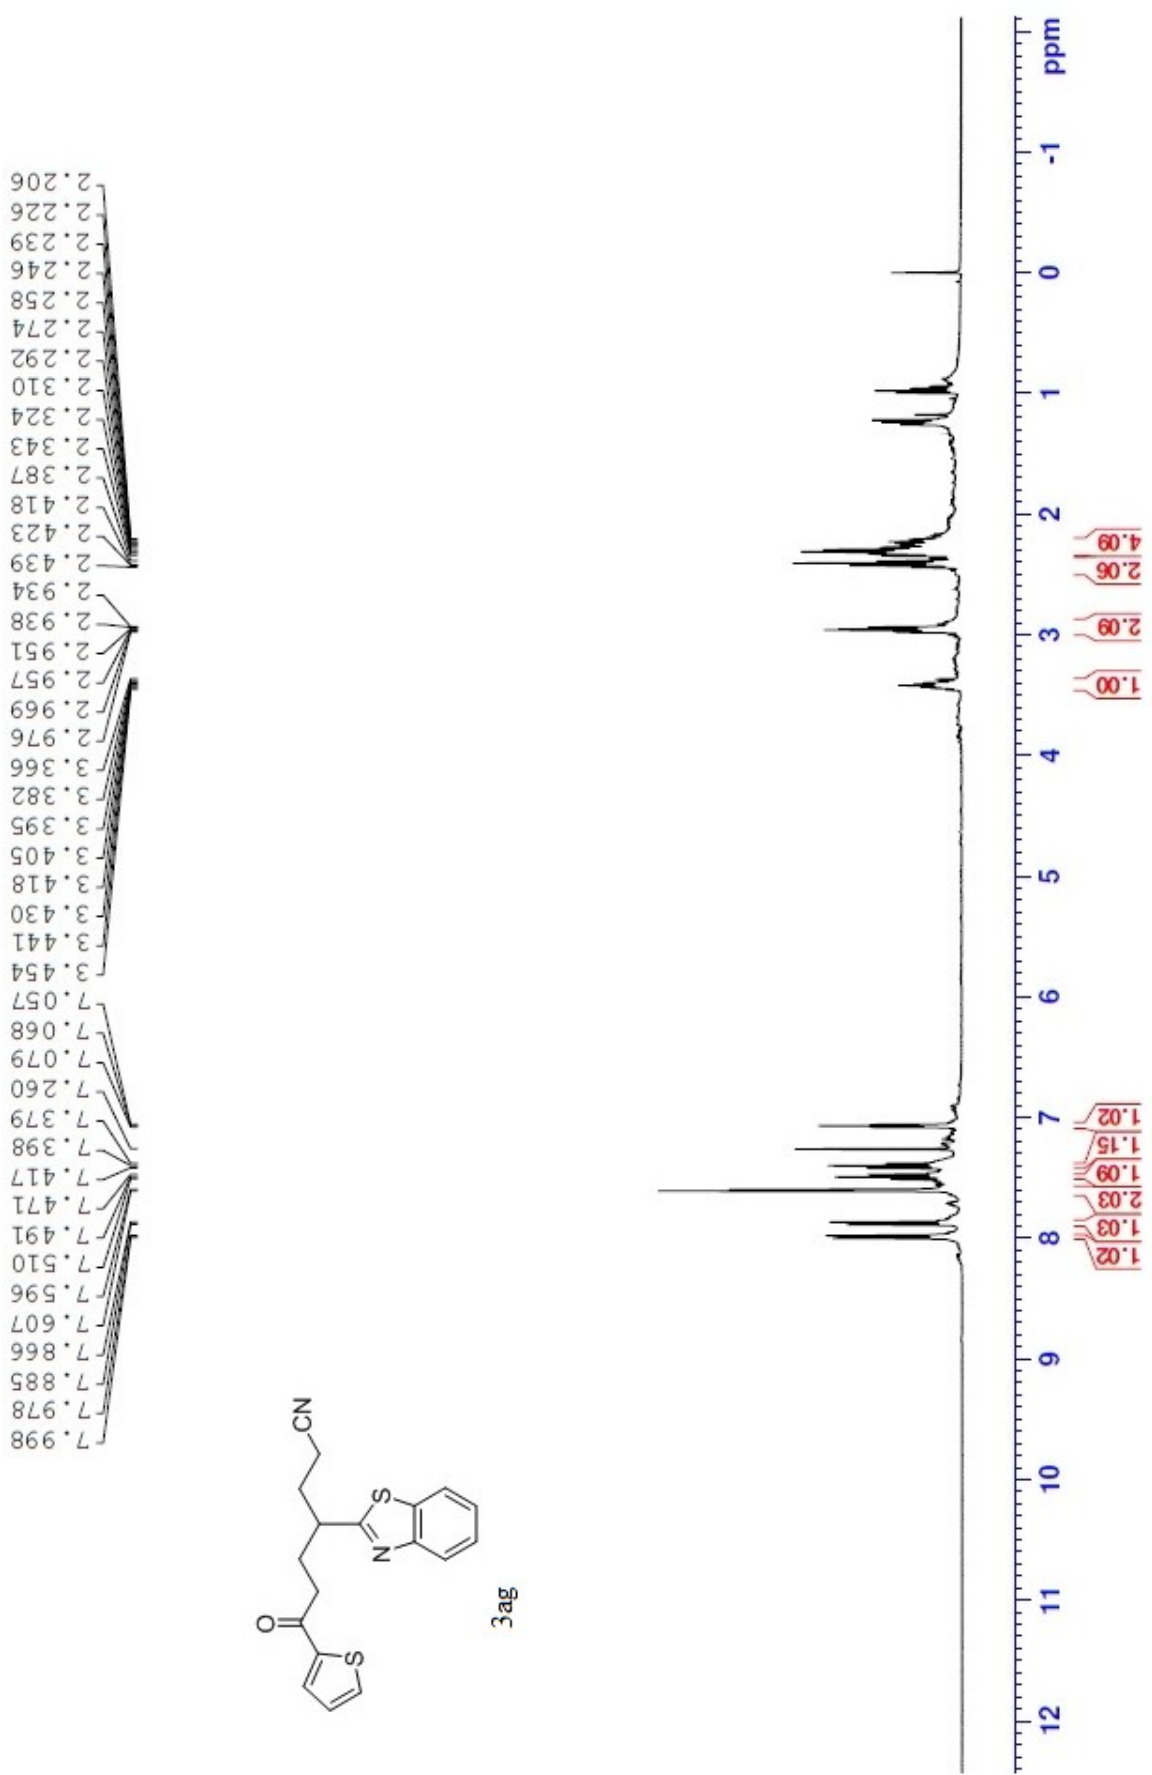

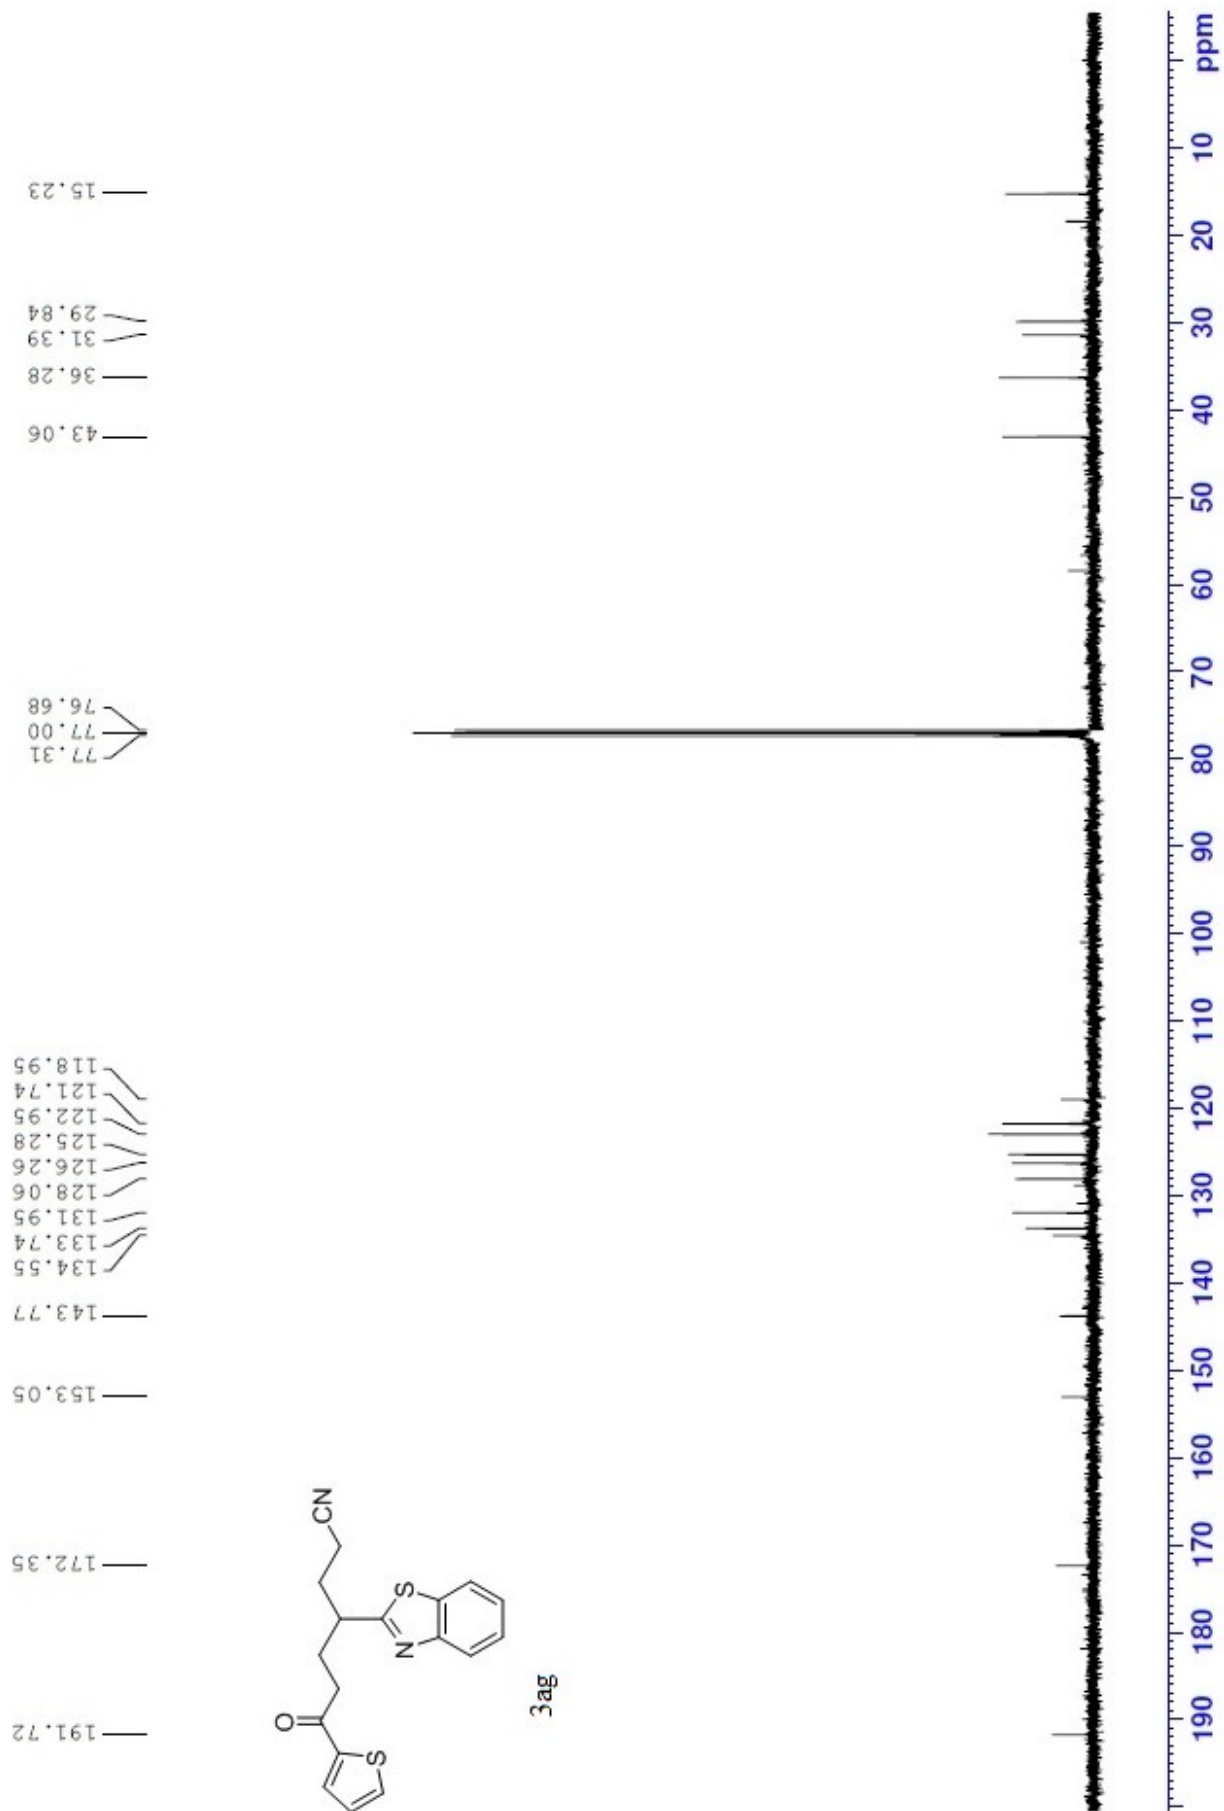



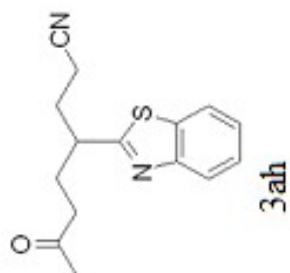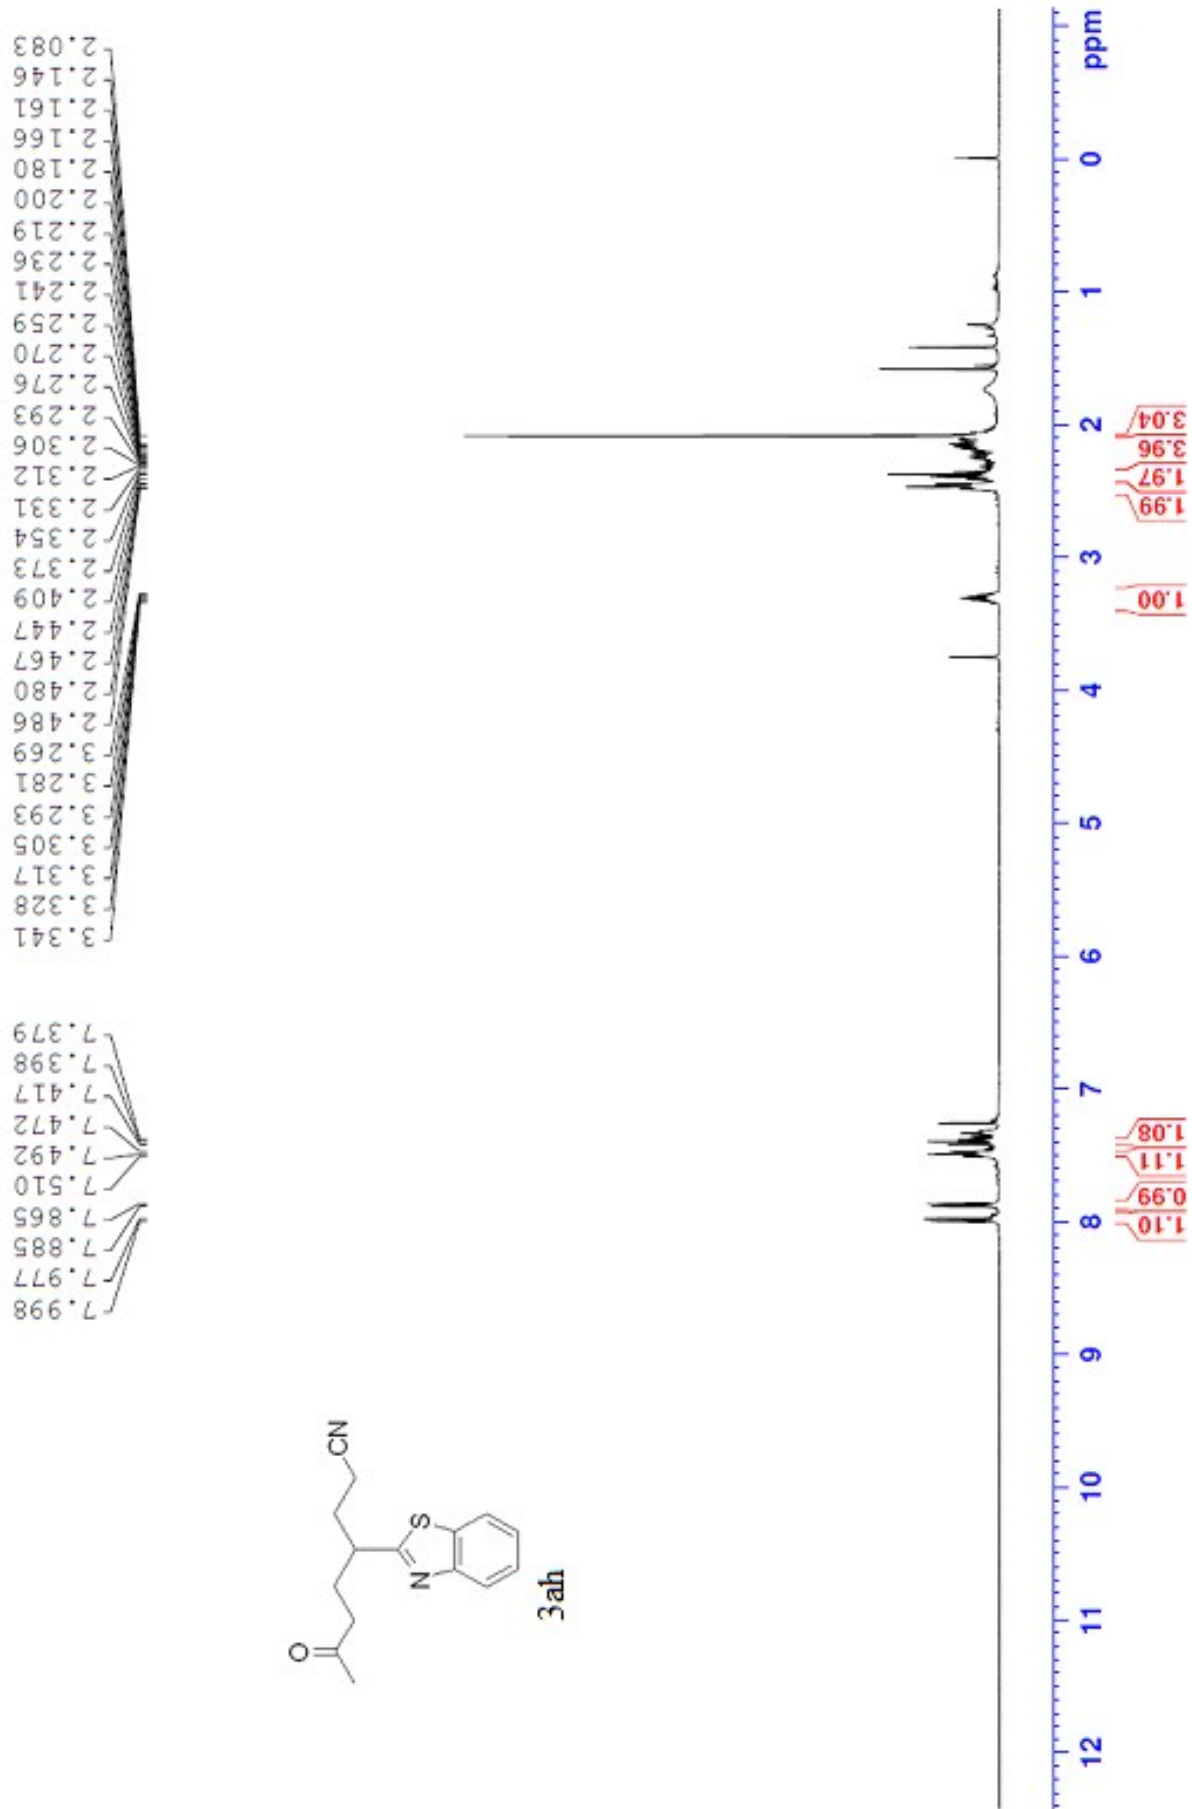

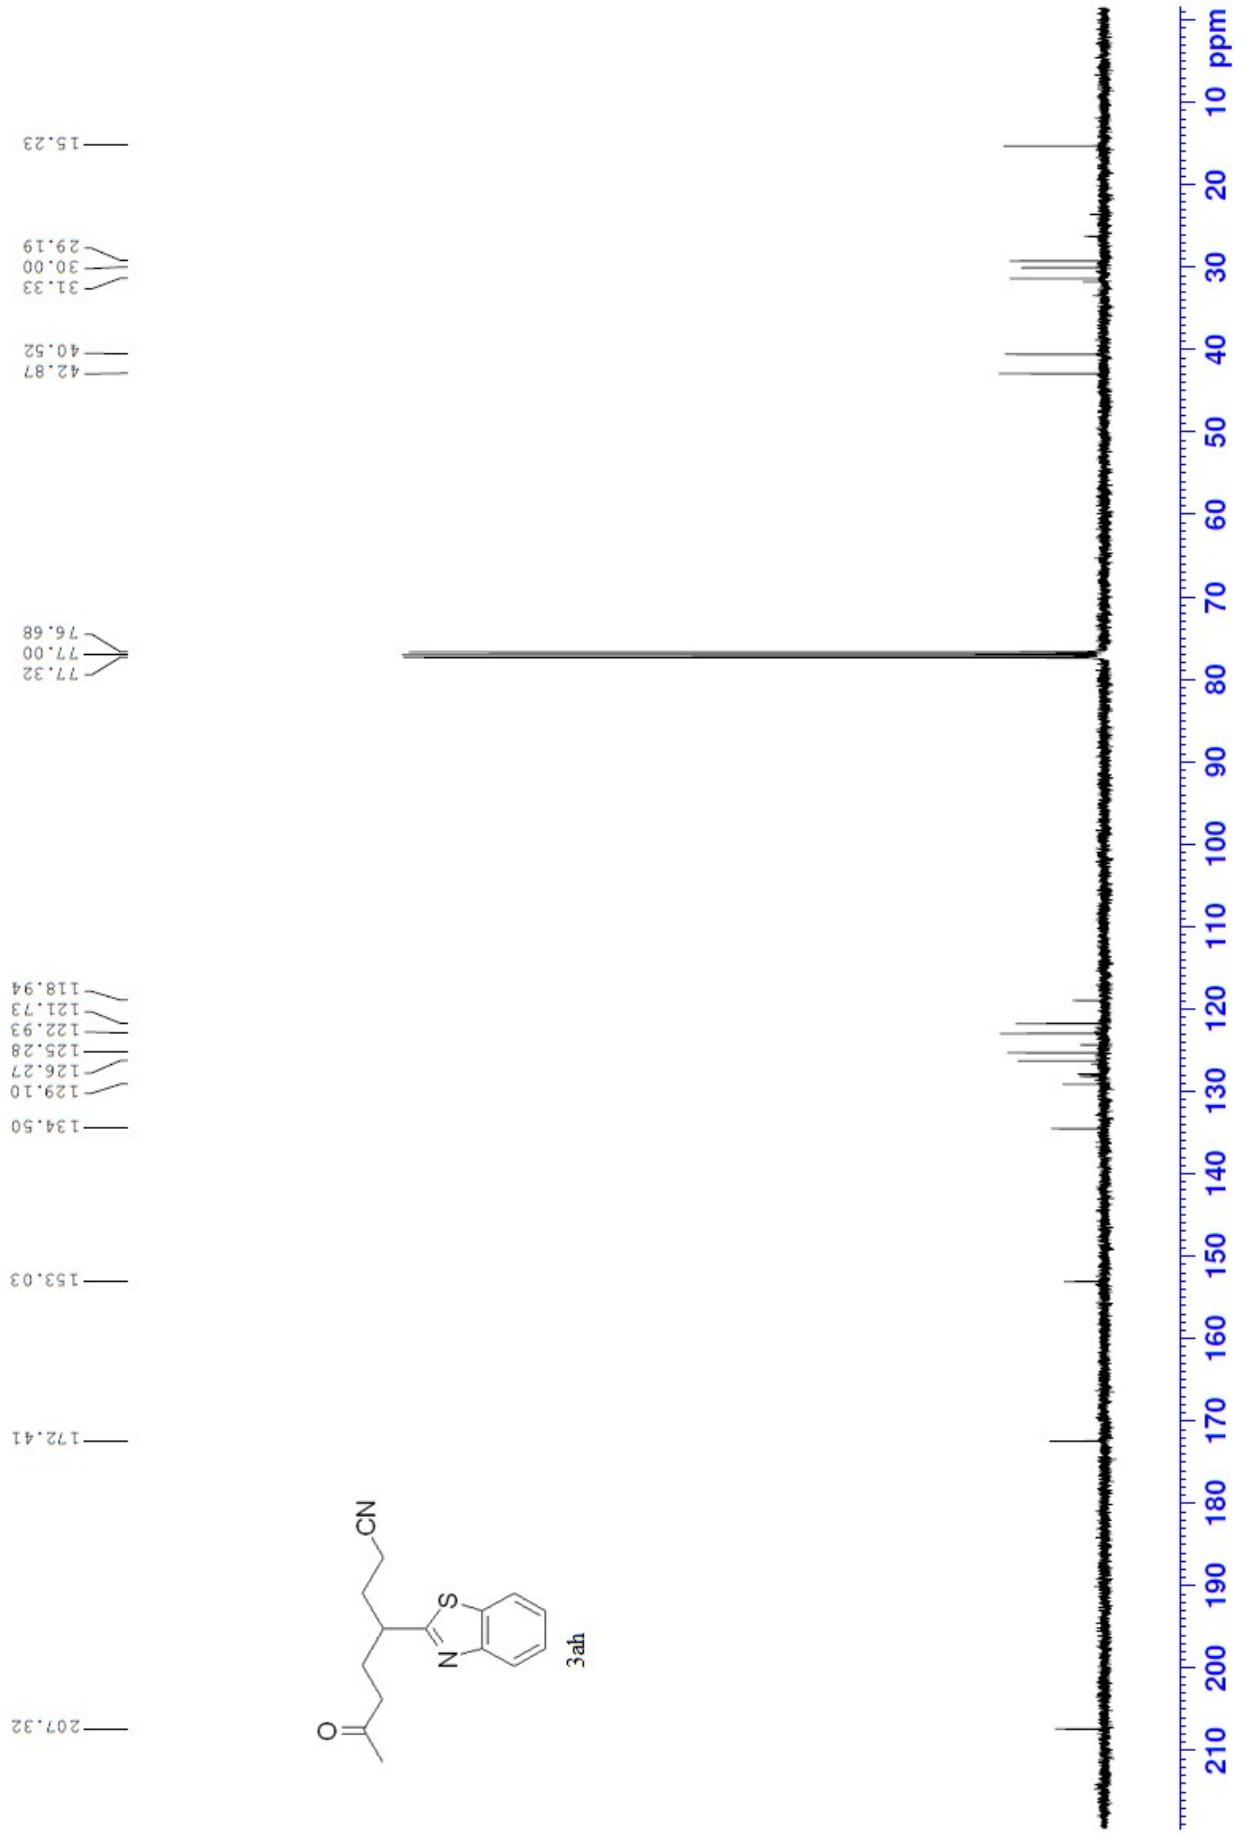

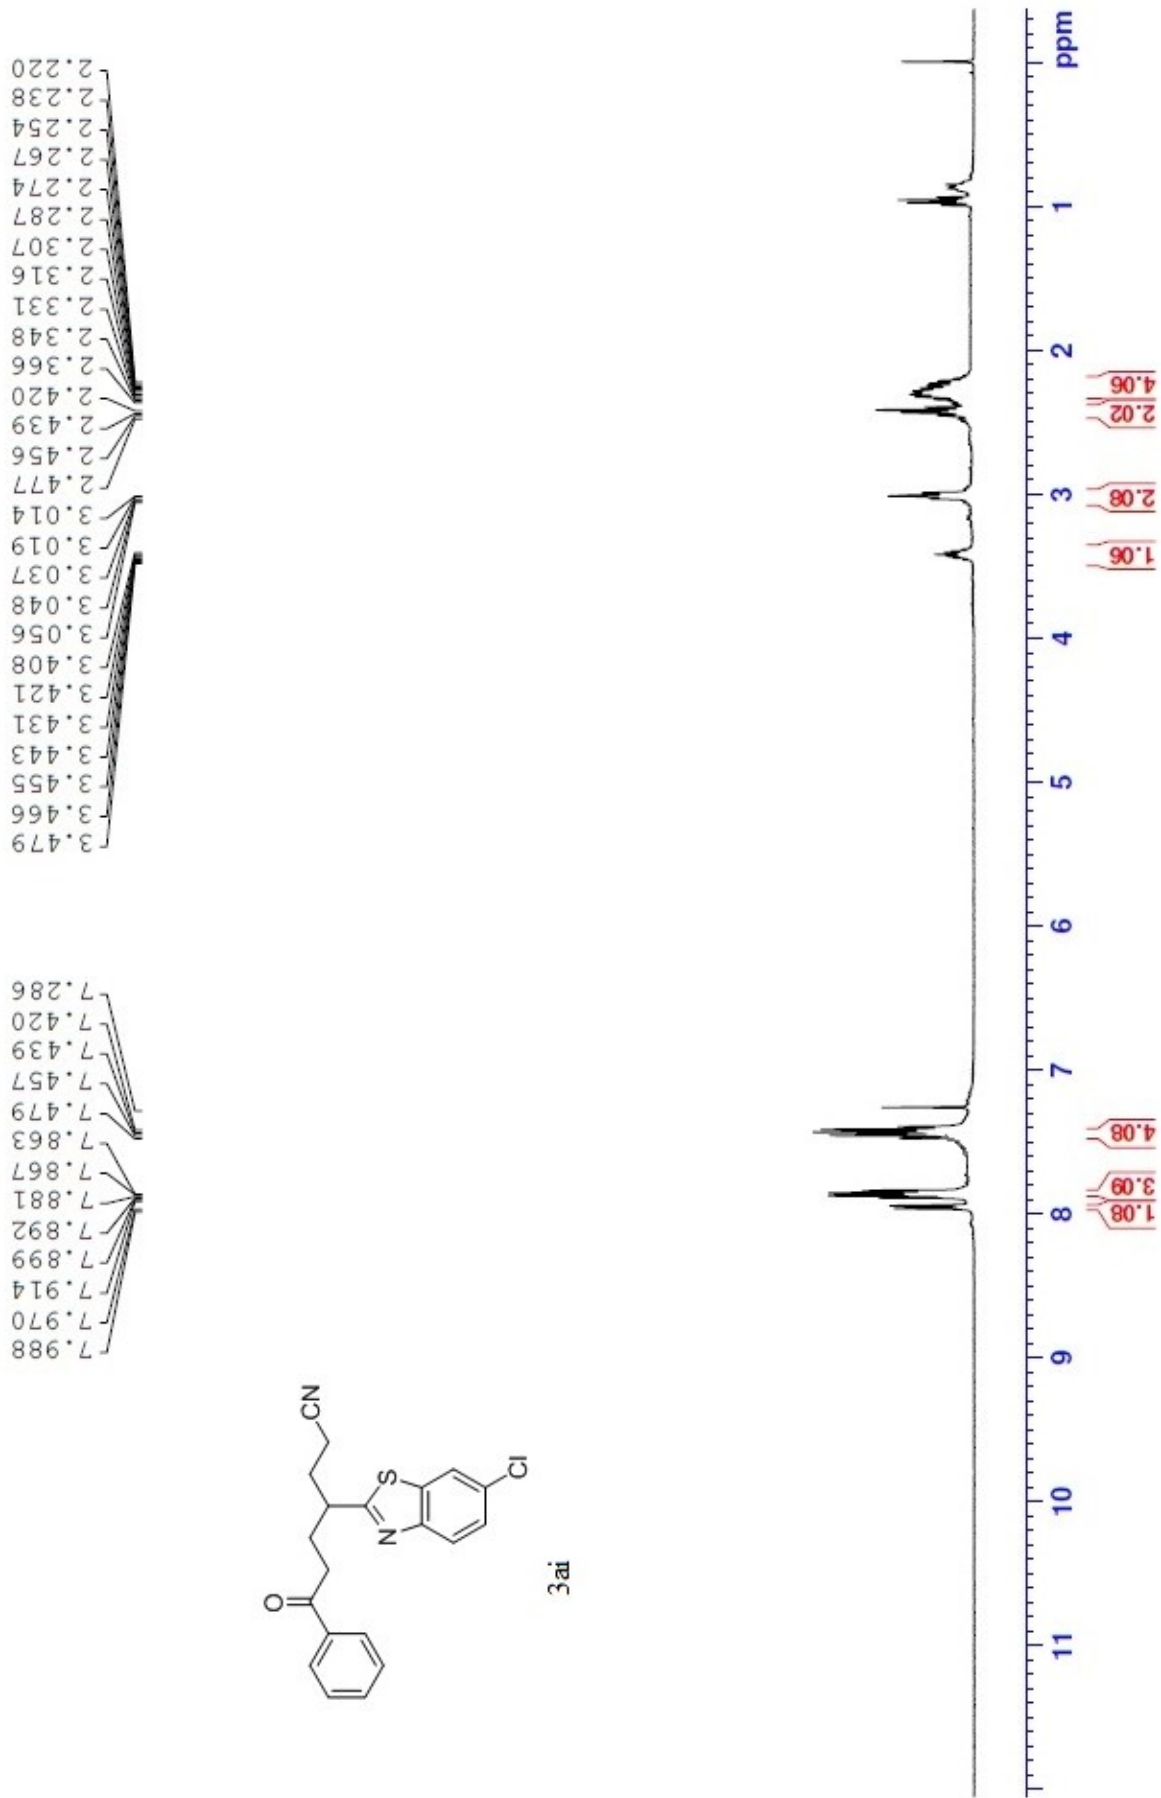

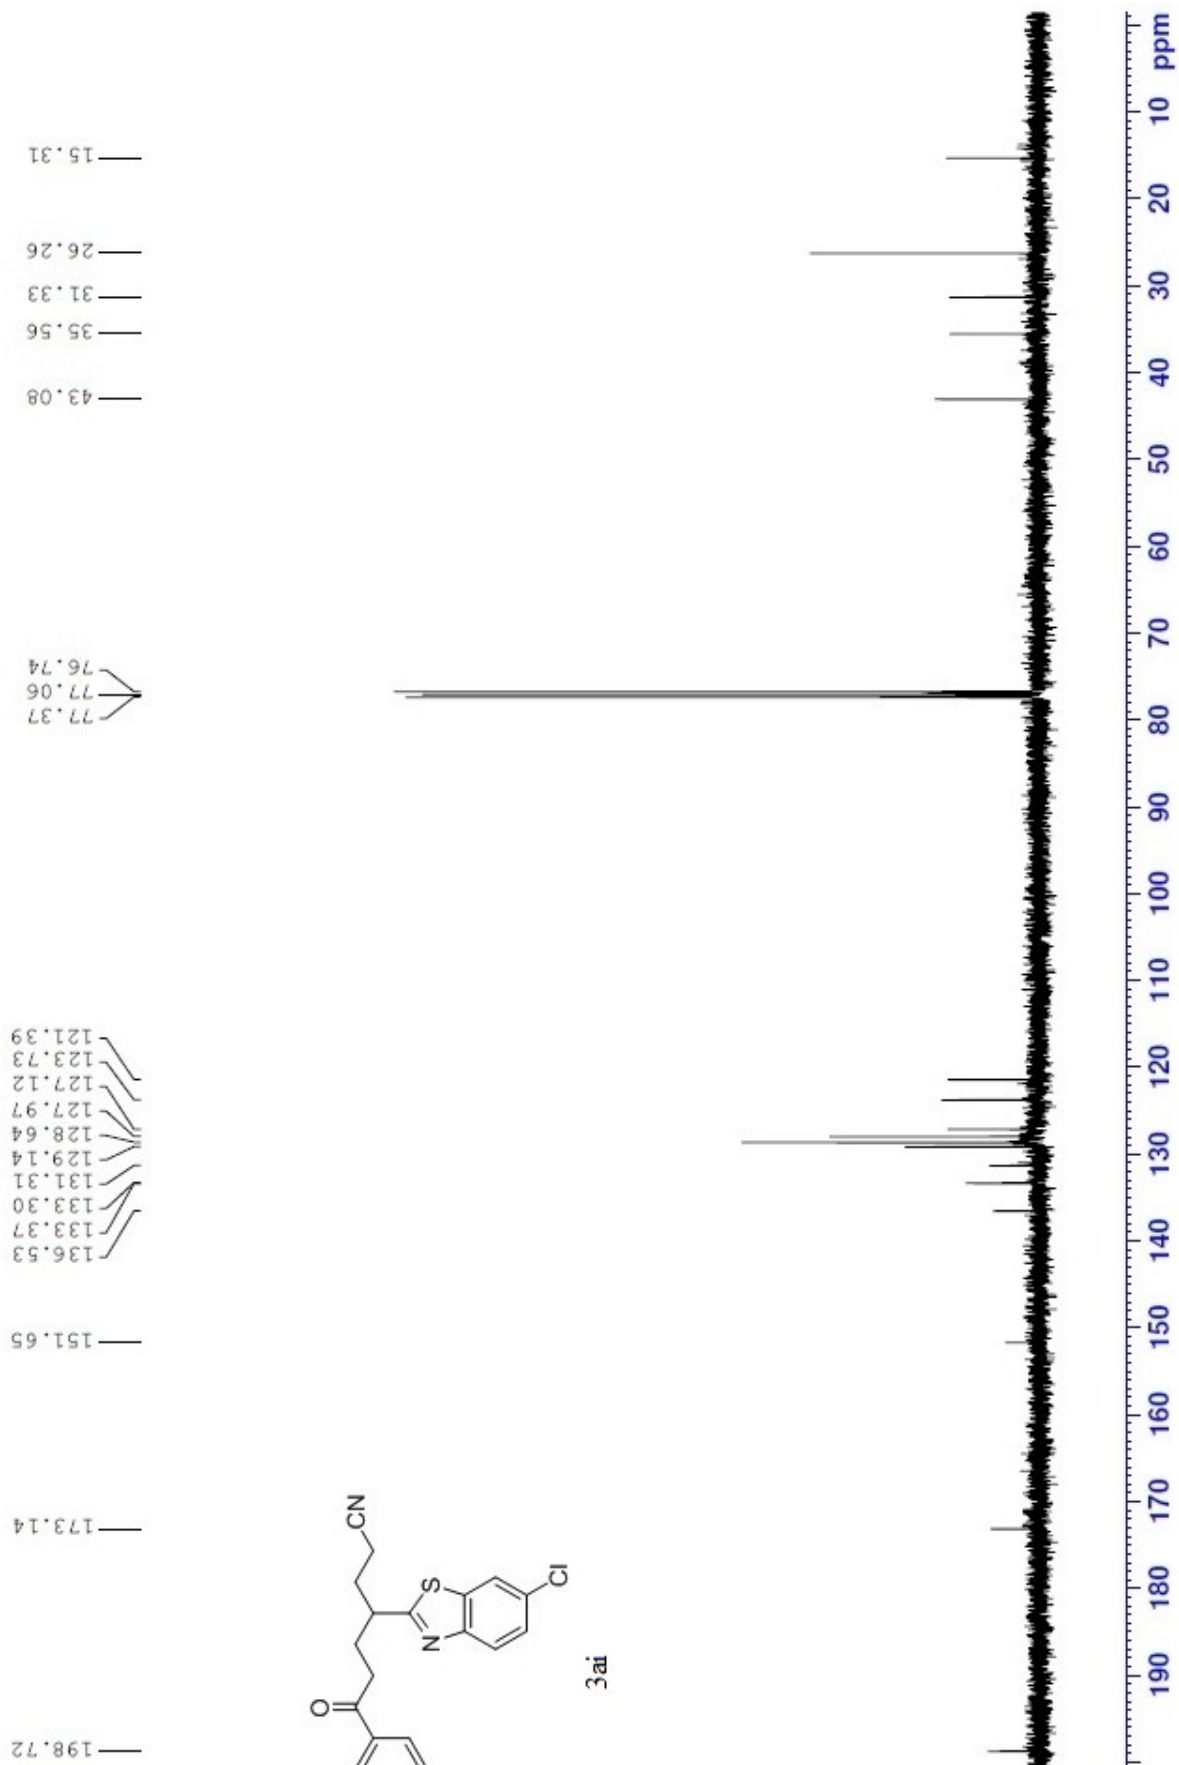

7.900  
7.895  
7.882  
7.874  
7.874  
7.683  
7.571  
7.553  
7.534  
7.452  
7.433  
7.414  
7.331  
7.310  
7.285  
3.457  
3.444  
3.433  
3.421  
3.409  
3.398  
3.385  
3.056  
3.037  
3.029  
3.024  
3.019  
2.509  
2.487  
2.460  
2.446  
2.439  
2.429  
2.411  
2.362  
2.344  
2.338  
2.328  
2.312  
2.303  
2.294  
2.287  
2.271  
2.266  
2.252  
2.244  
2.232

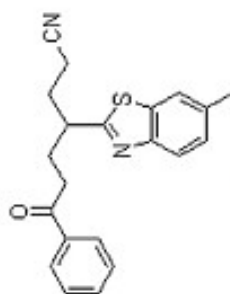

3aj

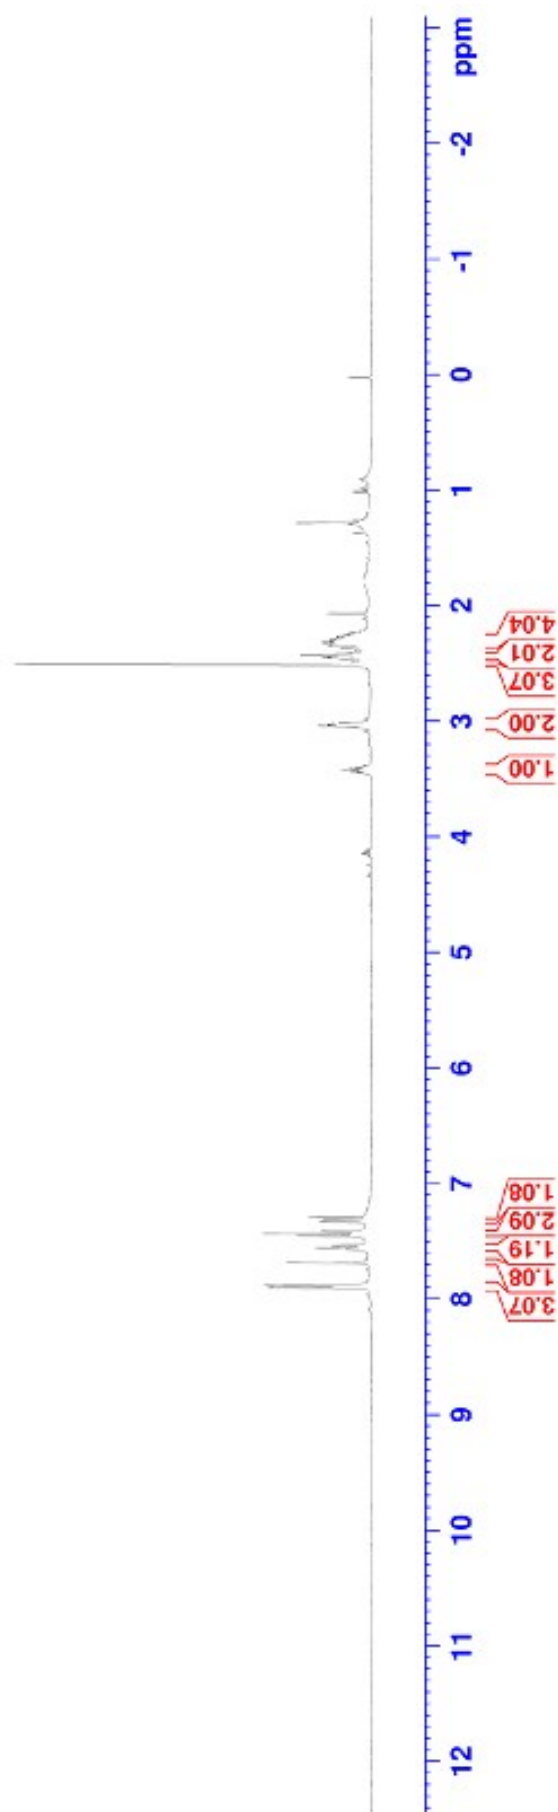

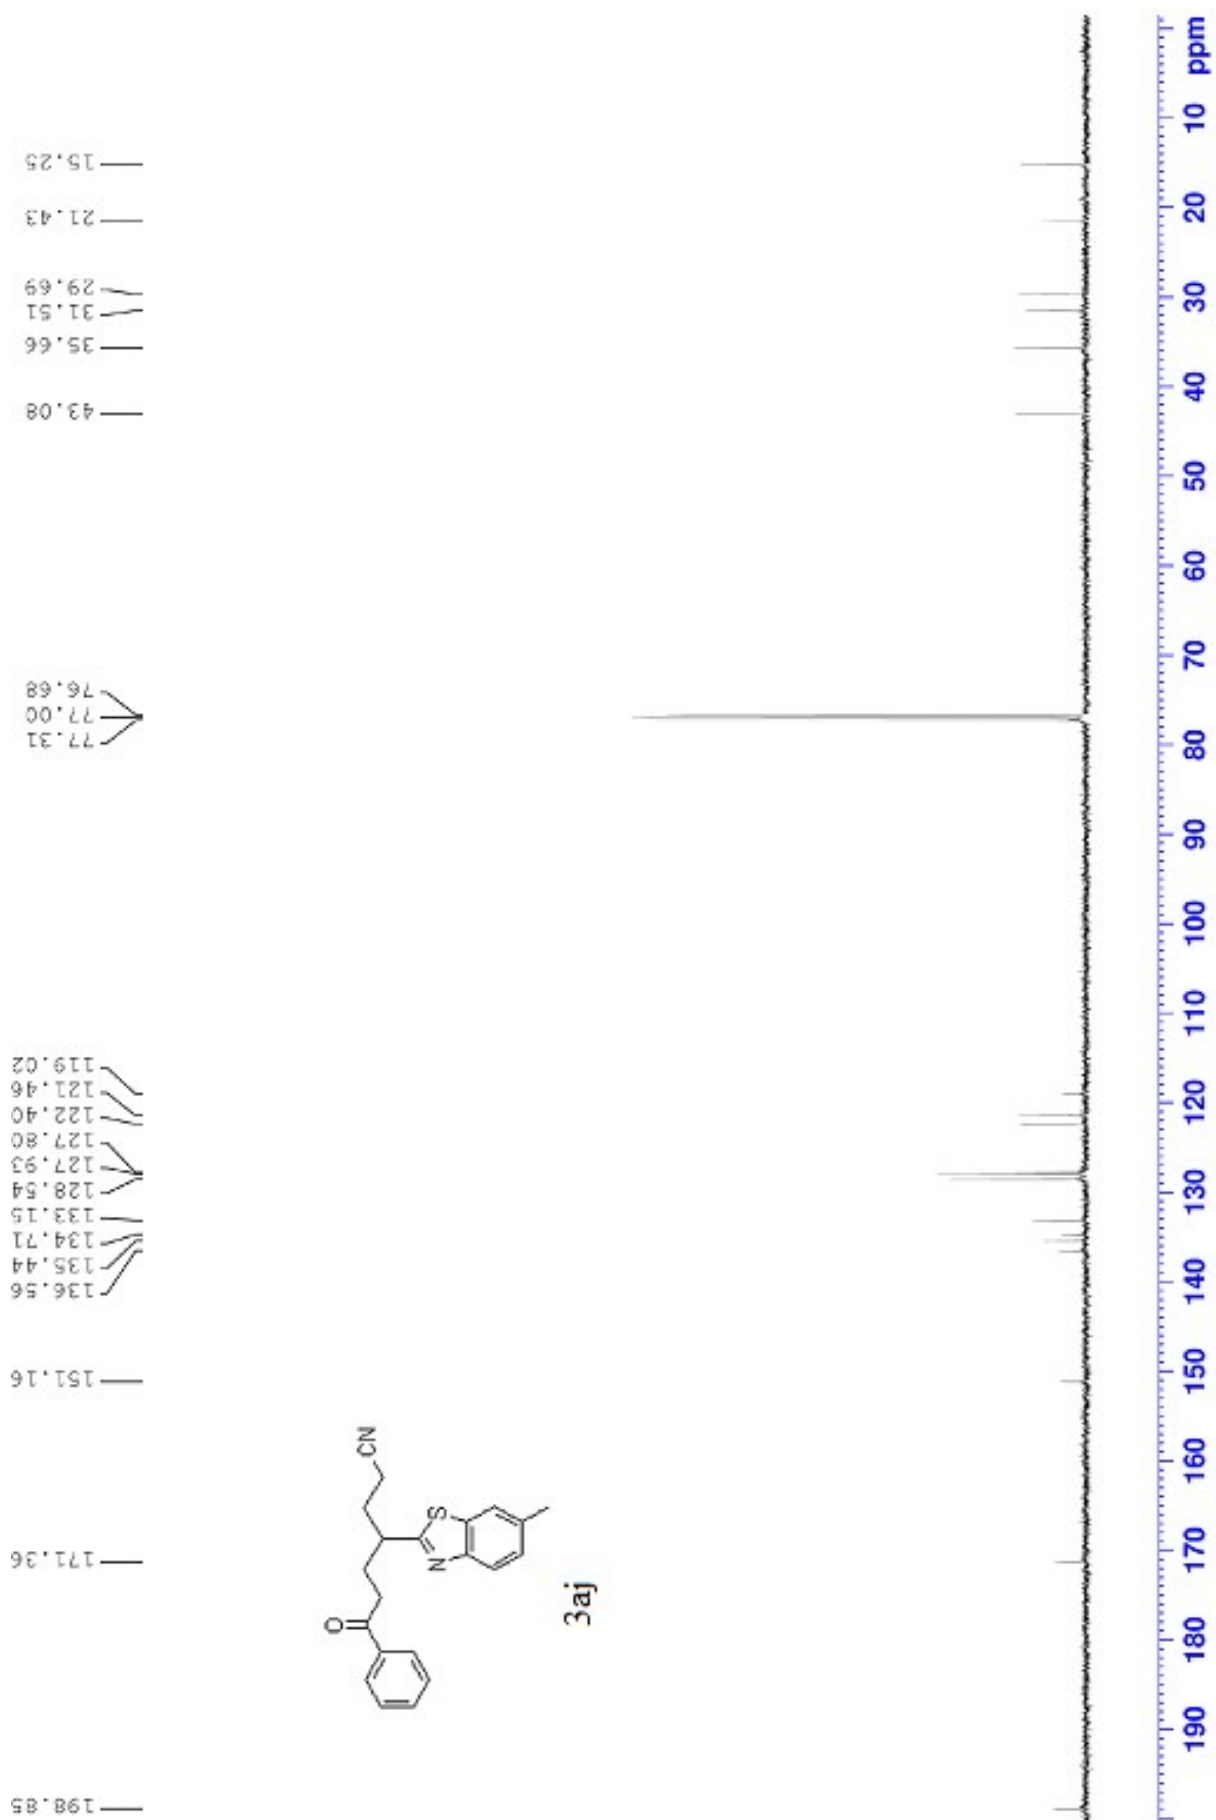

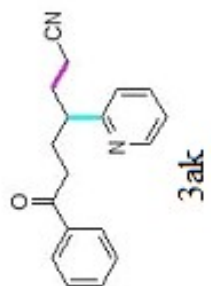

3.259  
3.243  
3.220  
3.200  
3.177  
3.006  
2.989  
2.968  
2.954  
2.920  
2.270  
2.260  
2.251  
2.074  
2.061  
2.052  
2.034  
2.018

8.638  
8.629  
8.007  
7.987  
7.966  
7.947  
7.822  
7.806  
7.788  
7.734  
7.723  
7.711  
7.590  
7.571  
7.543  
7.535  
7.528  
7.521  
7.478  
7.458  
7.438  
7.422

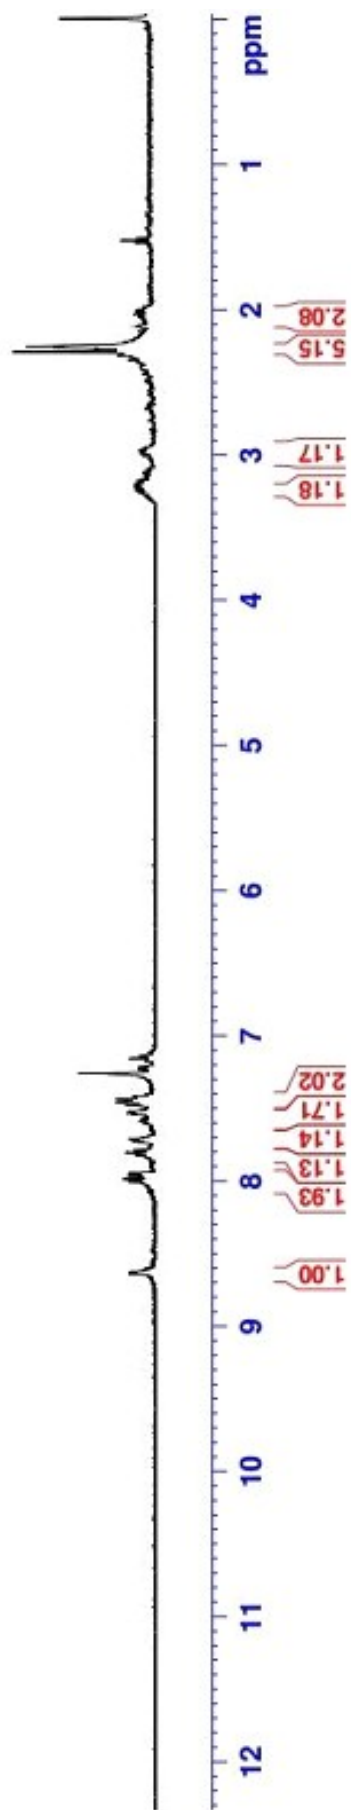

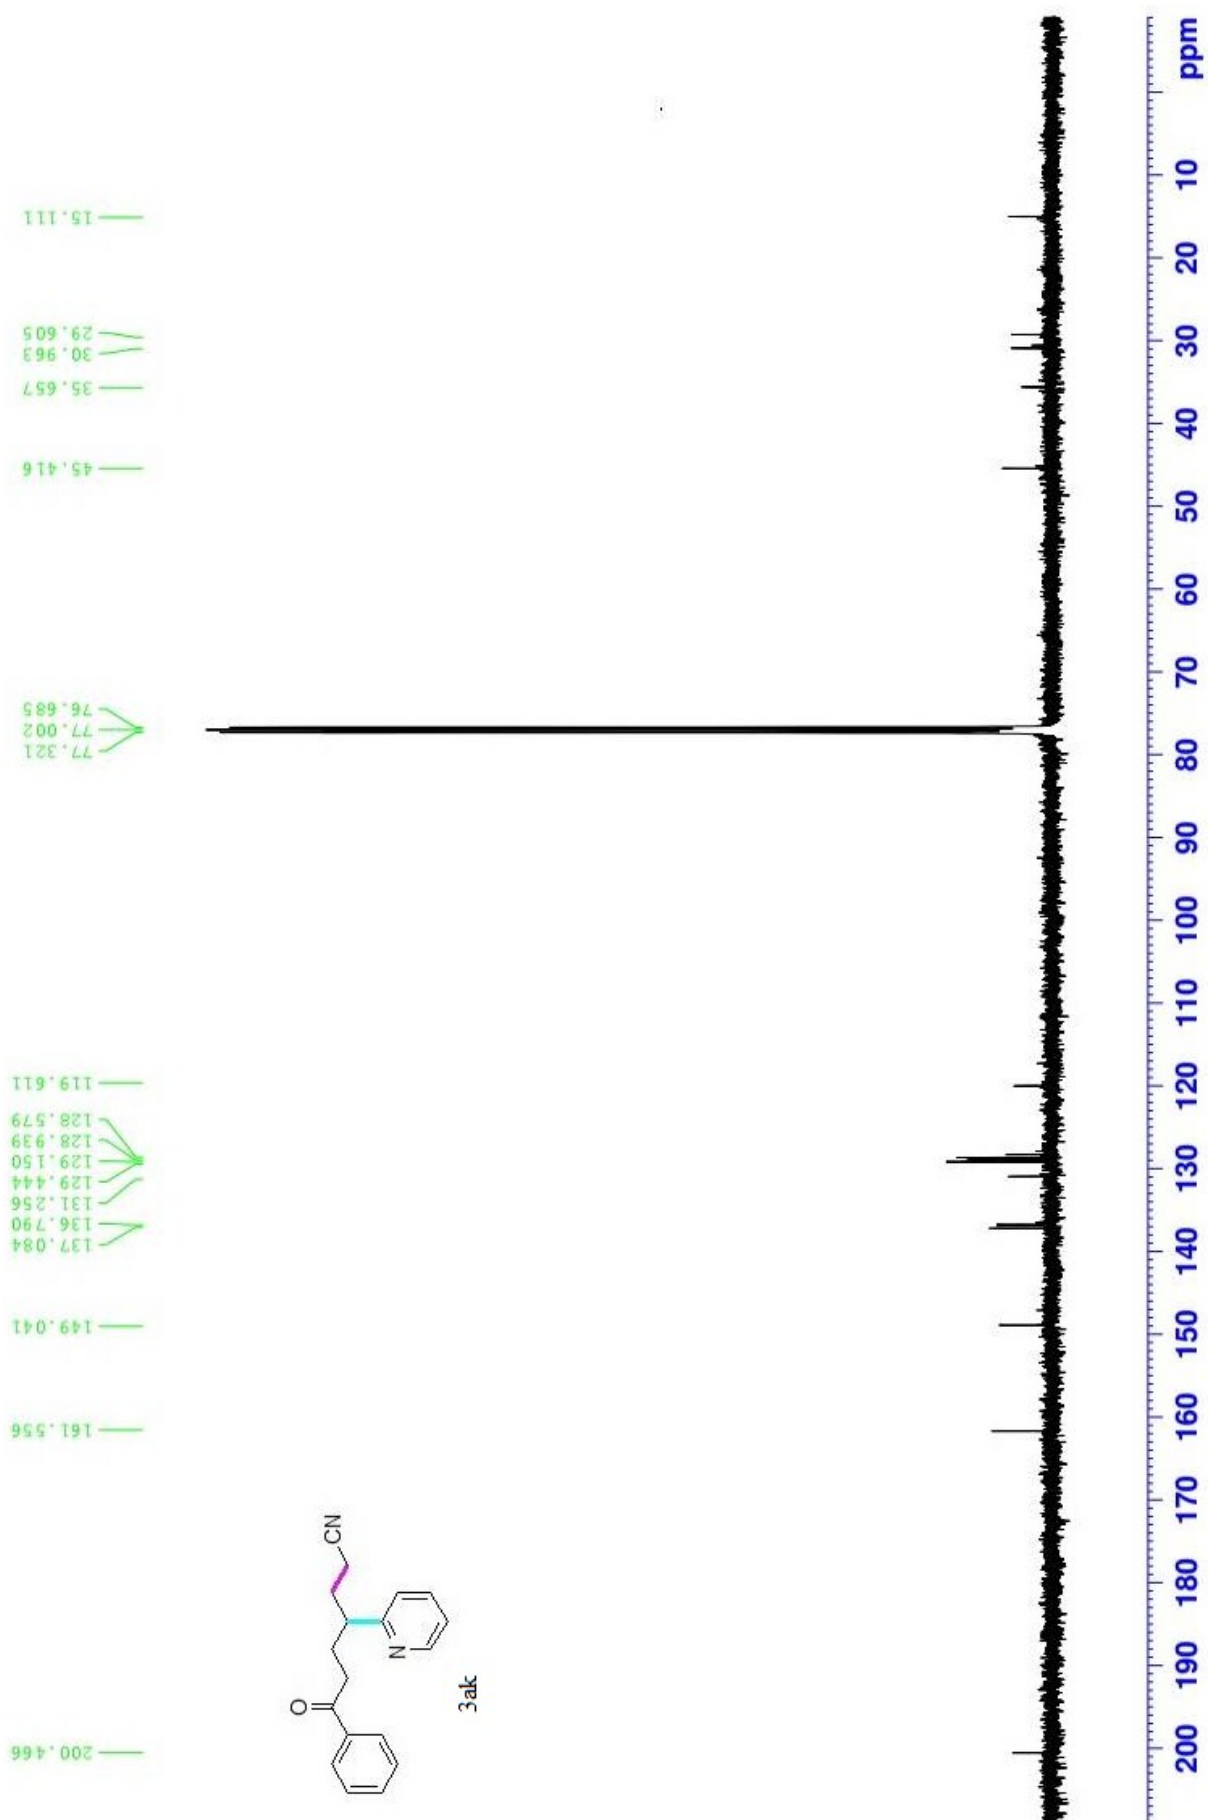



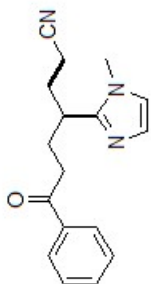

3al

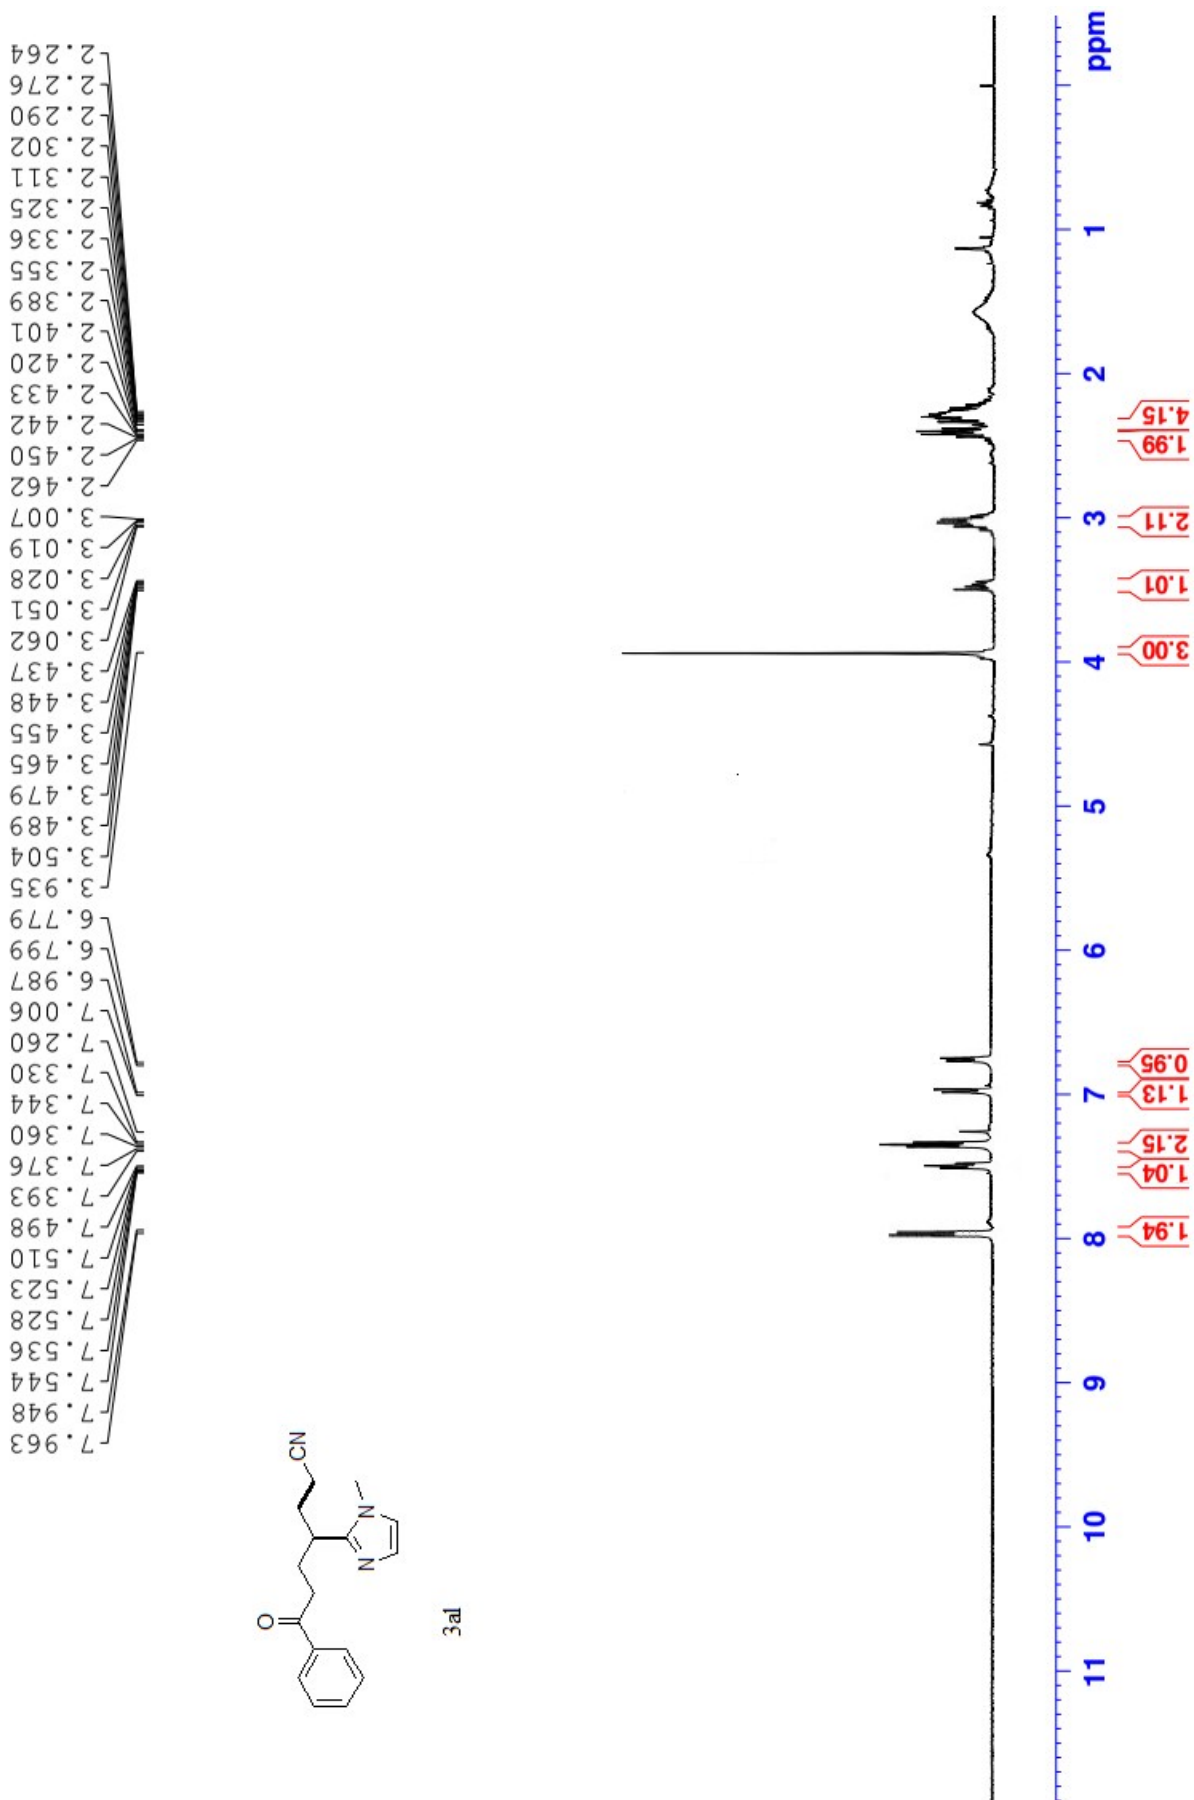

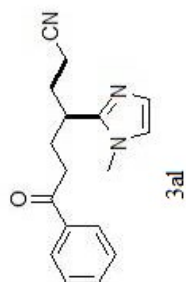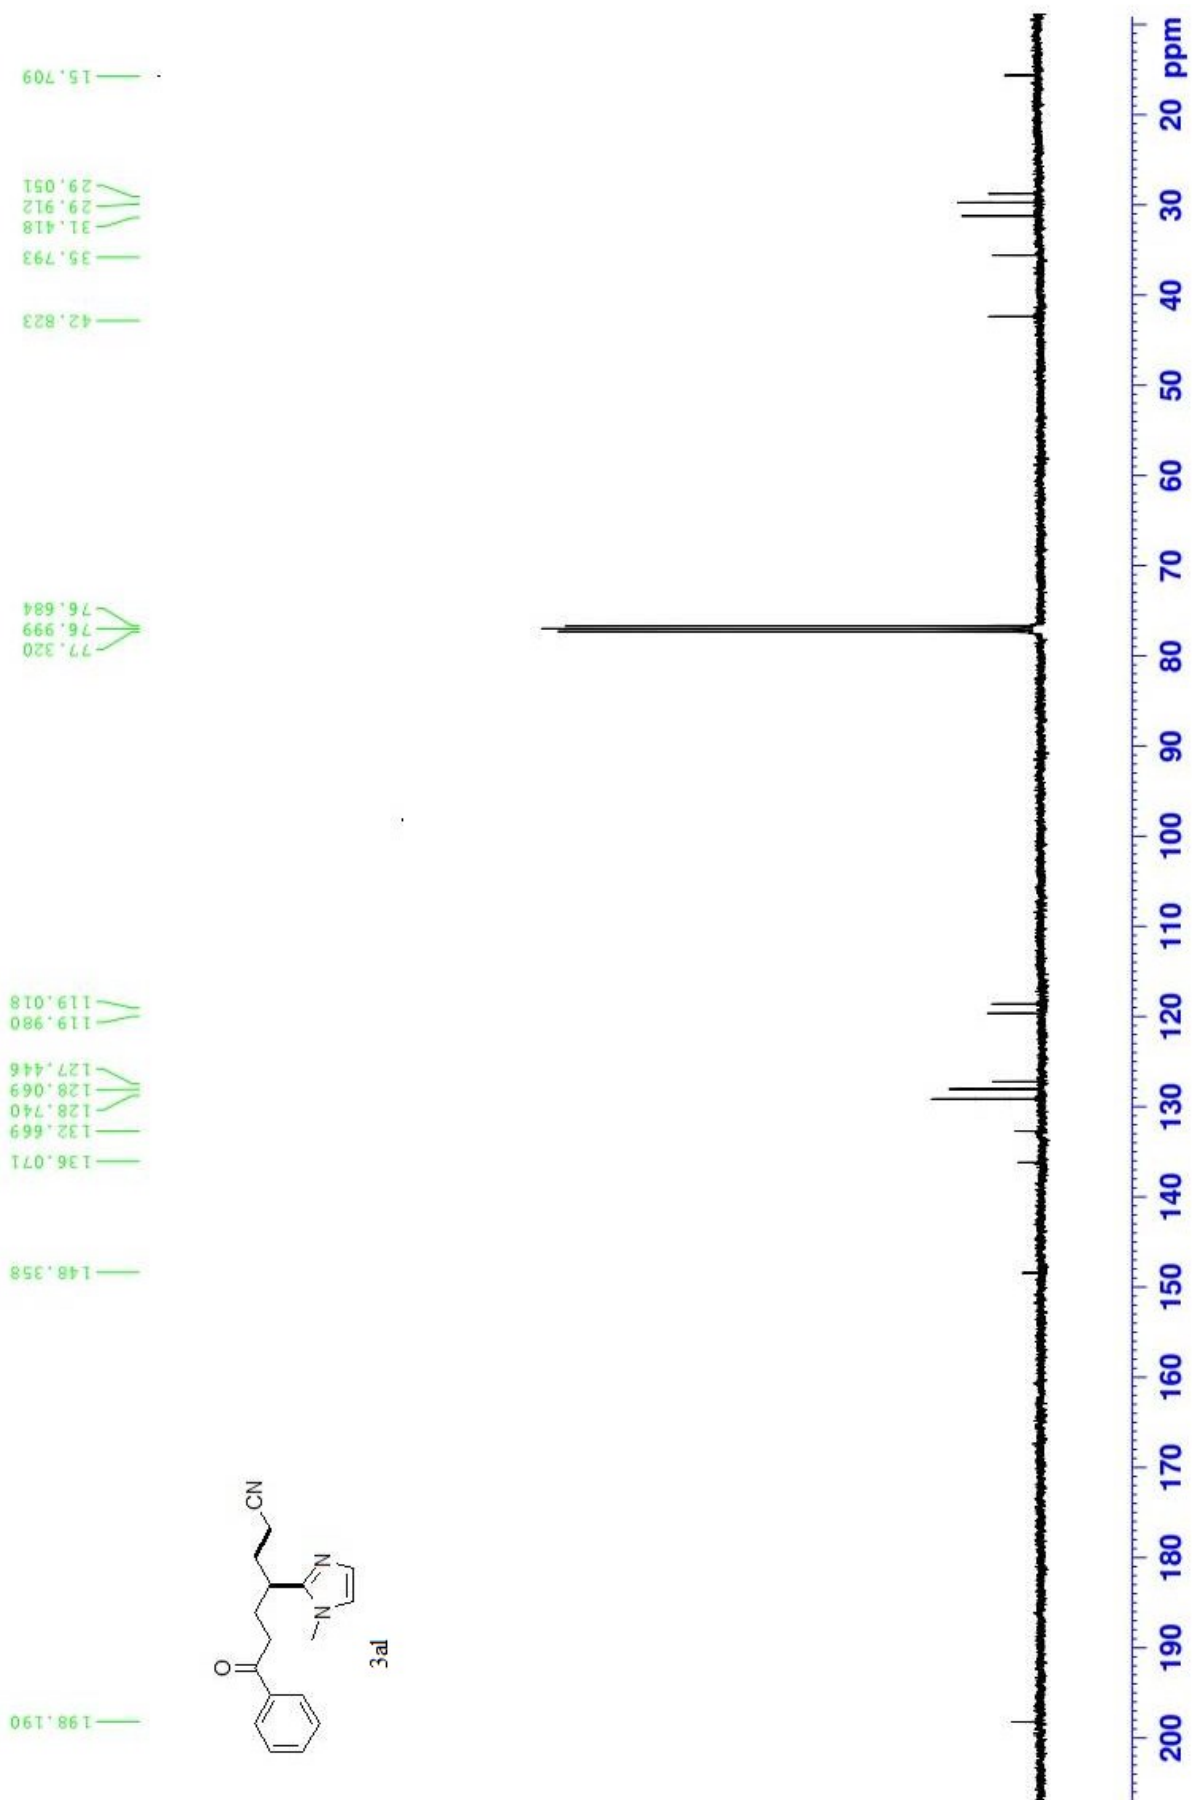

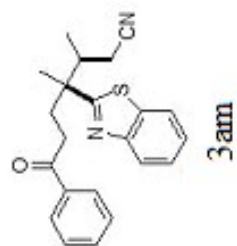

1.544  
 1.502  
 1.295  
 1.278  
 1.155  
 1.138

8.013  
 7.993  
 7.900  
 7.881  
 7.861  
 7.833  
 7.814  
 7.528  
 7.513  
 7.496  
 7.478  
 7.423  
 7.405  
 7.386  
 7.367  
 7.260

2.955  
 2.941  
 2.927  
 2.916  
 2.901  
 2.879  
 2.812  
 2.800  
 2.785  
 2.772  
 2.757  
 2.742  
 2.723  
 2.714  
 2.673  
 2.660  
 2.652  
 2.644  
 2.635  
 2.638  
 2.438  
 2.405  
 2.398  
 2.363  
 2.355  
 2.310  
 2.284  
 2.268  
 2.242  
 2.235  
 2.208  
 2.193  
 2.180  
 1.544  
 1.502  
 1.295  
 1.278  
 1.155  
 1.138

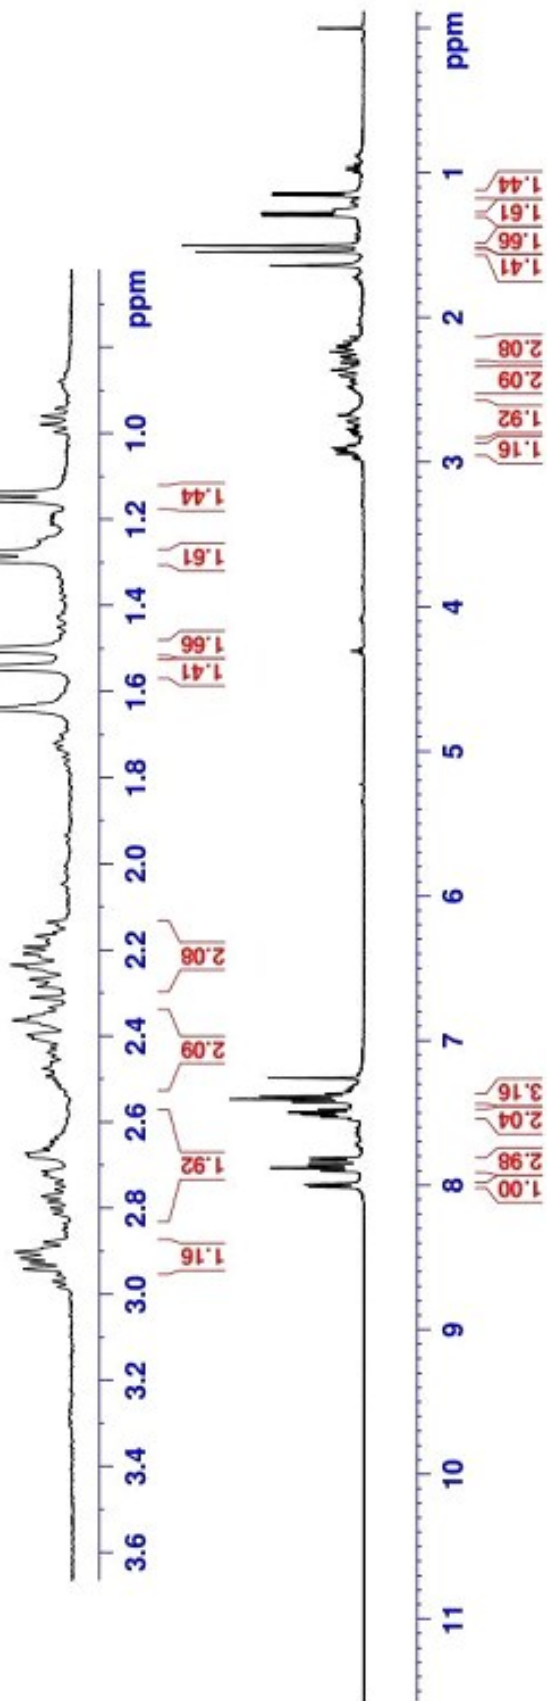

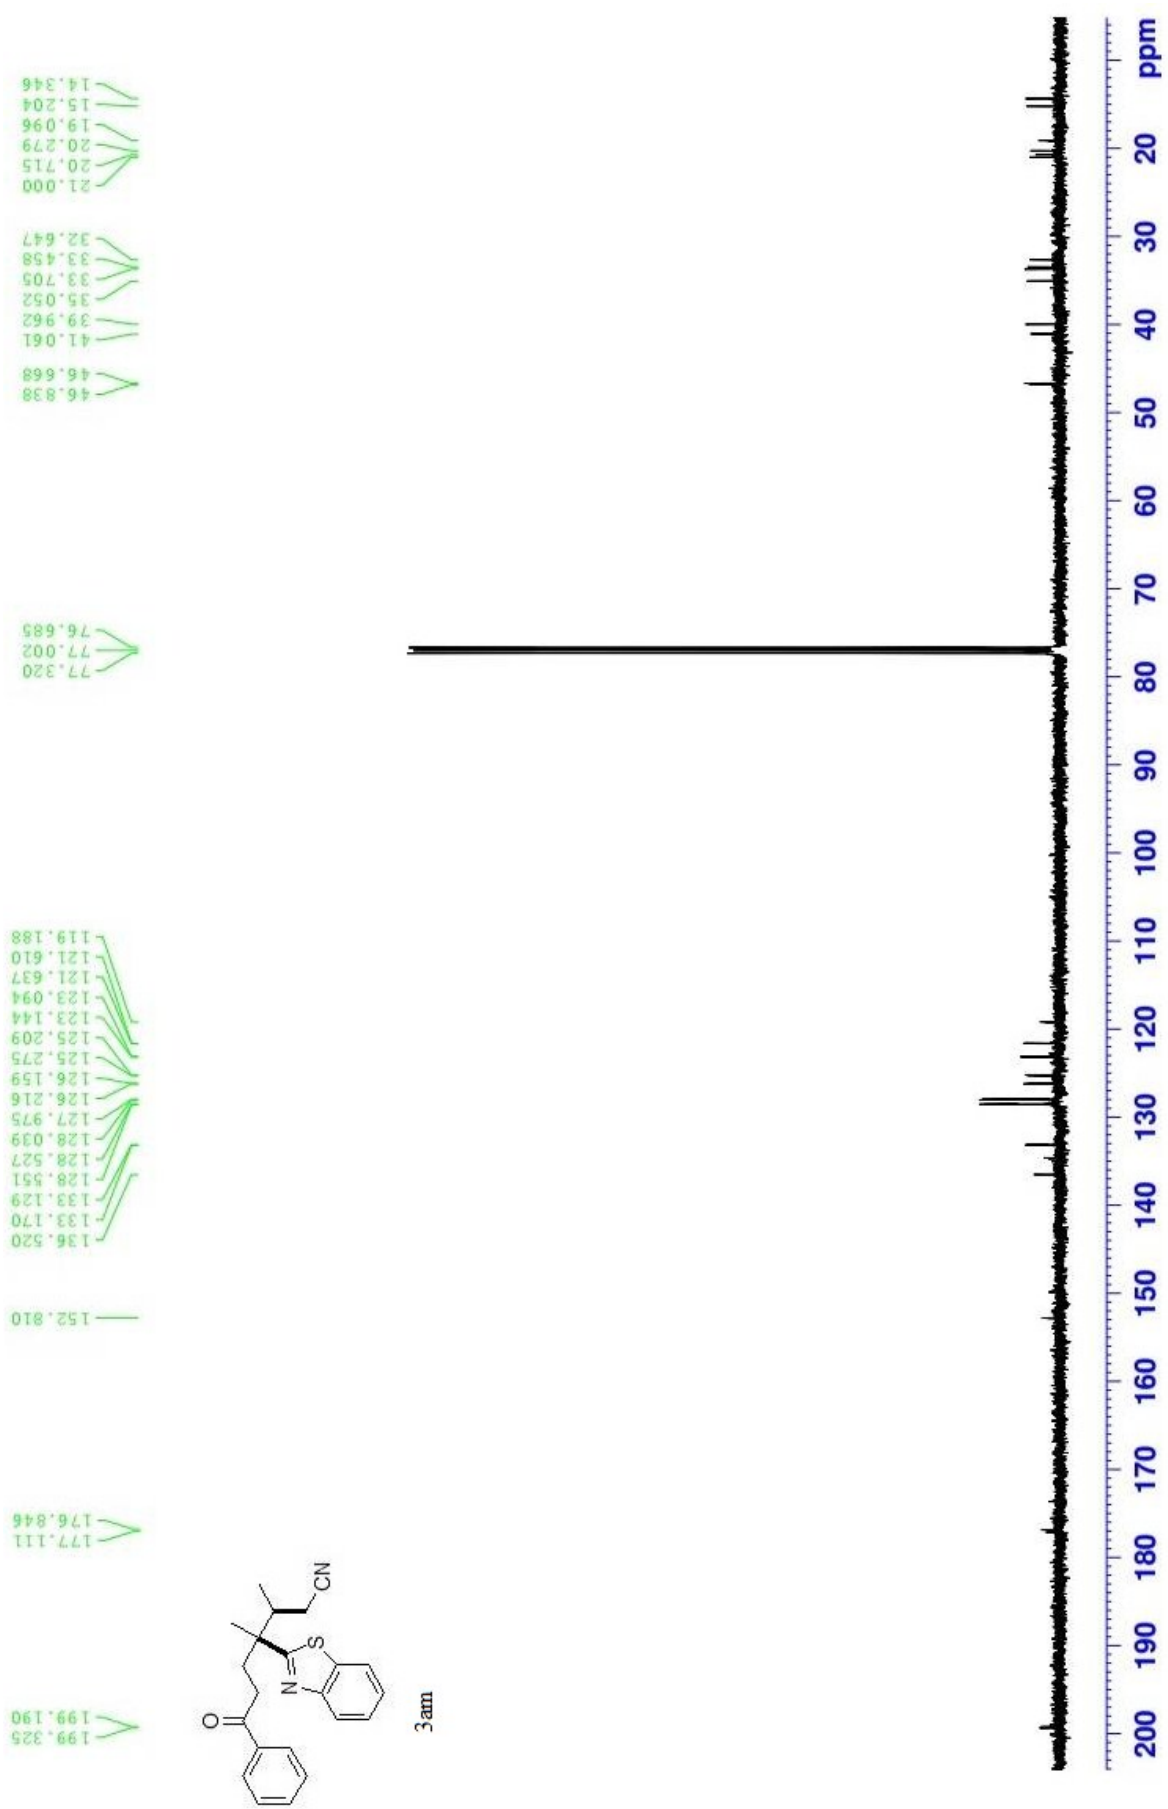

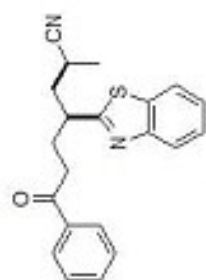

3ba

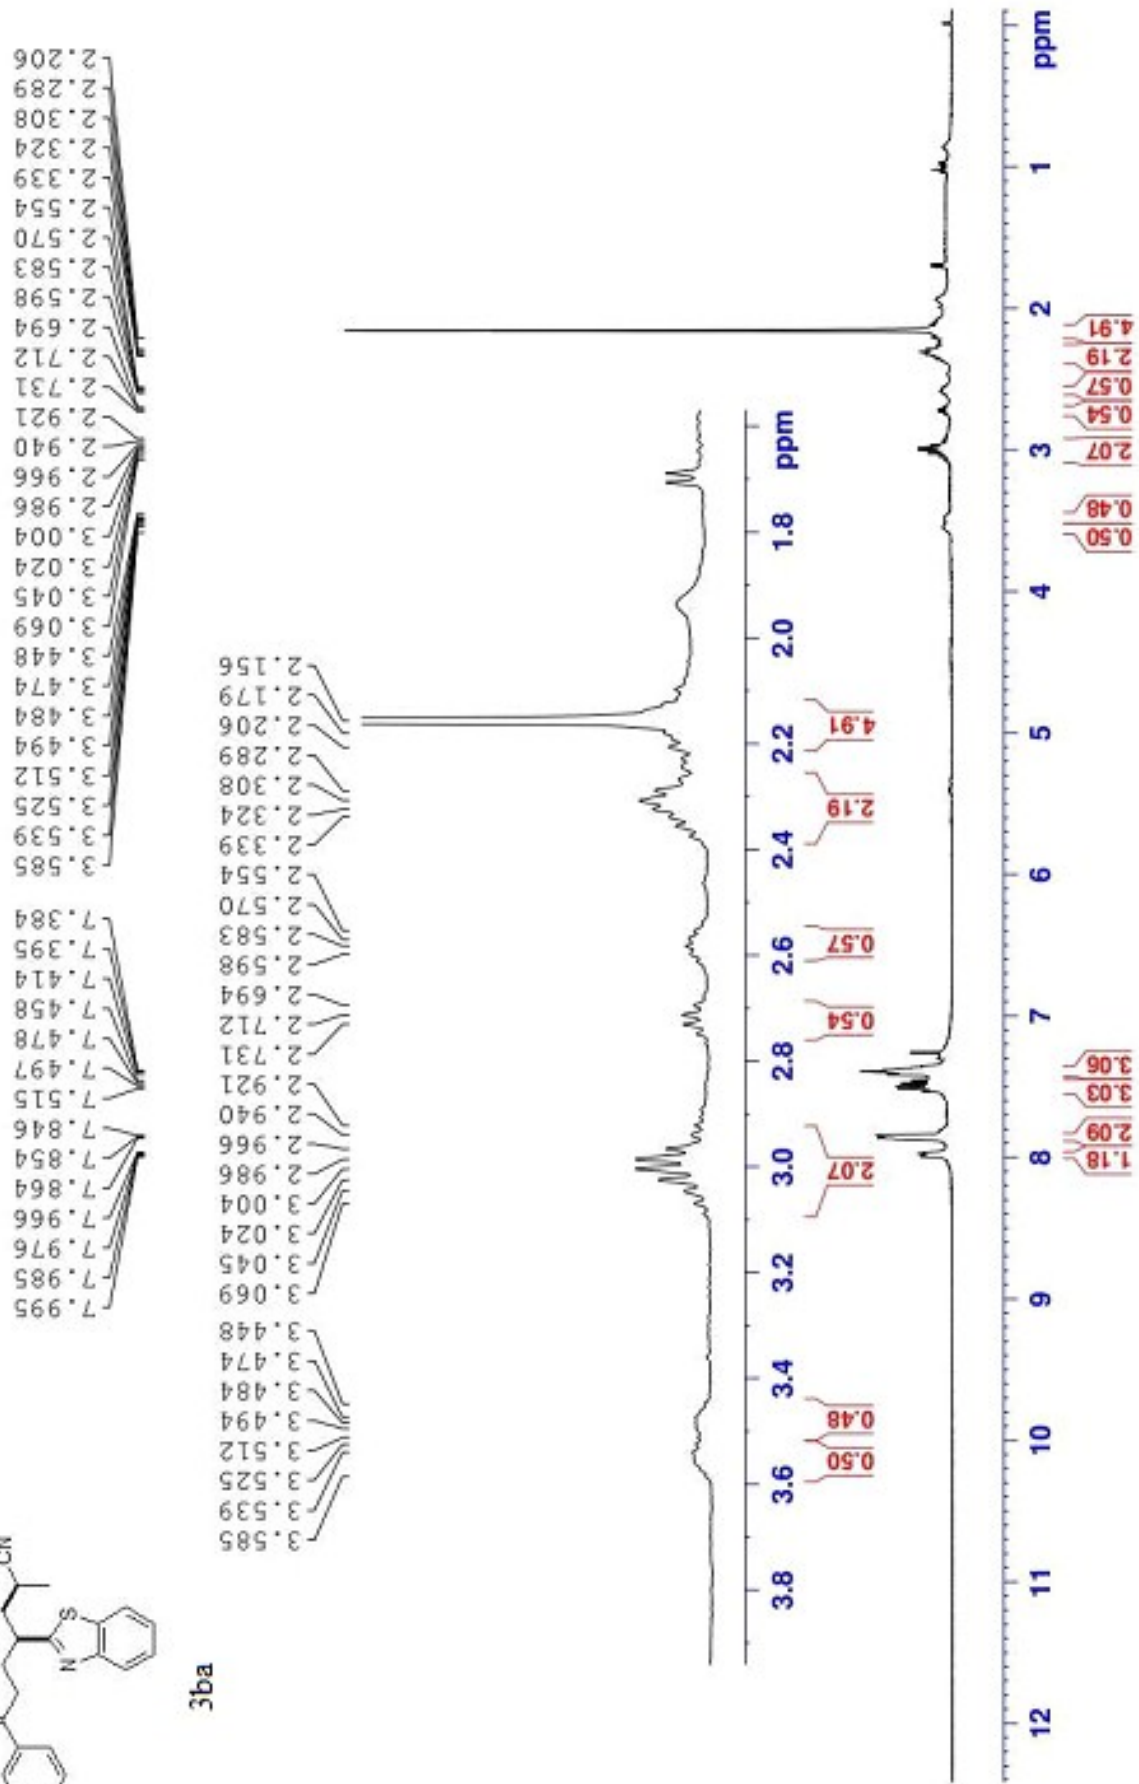

42.280  
41.491  
40.111  
39.743  
35.689  
35.517  
30.884  
30.329  
23.942  
23.067  
18.355  
17.503

77.320  
77.002  
76.684

136.414  
134.441  
133.147  
133.110  
129.282  
128.671  
128.493  
127.880  
126.159  
125.193  
125.145  
122.846  
122.270  
121.717  
121.685

153.106

172.937  
172.724

198.866  
198.786

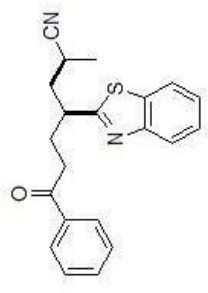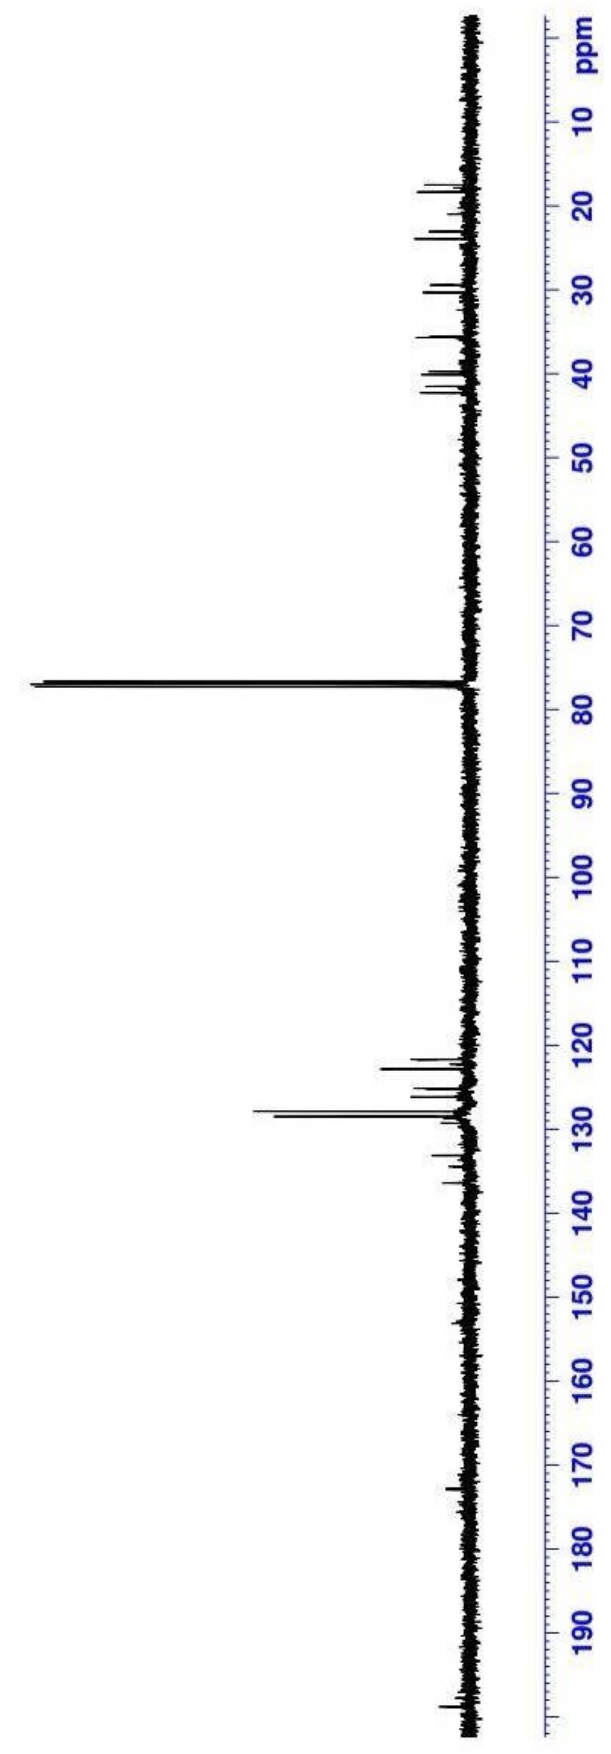



1.785  
 1.801  
 1.824  
 1.841  
 1.866  
 1.878  
 1.898  
 1.912  
 1.924  
 1.938  
 1.938  
 2.184  
 2.191  
 2.204  
 2.219  
 2.237  
 2.259  
 2.335  
 2.359  
 2.378  
 2.395  
 2.415  
 2.436  
 2.915  
 2.932  
 2.958  
 2.976  
 2.994  
 3.013  
 3.038  
 3.056  
 3.311  
 3.325  
 3.333  
 3.346  
 3.359  
 3.368  
 3.382  
 3.354  
 7.374  
 7.395  
 7.398  
 7.418  
 7.437  
 7.448  
 7.469  
 7.846  
 7.866  
 7.889  
 7.907  
 7.964  
 7.985

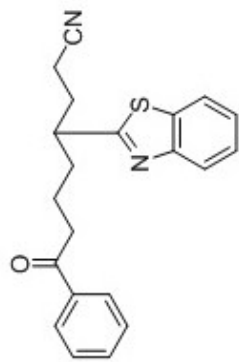

5aa

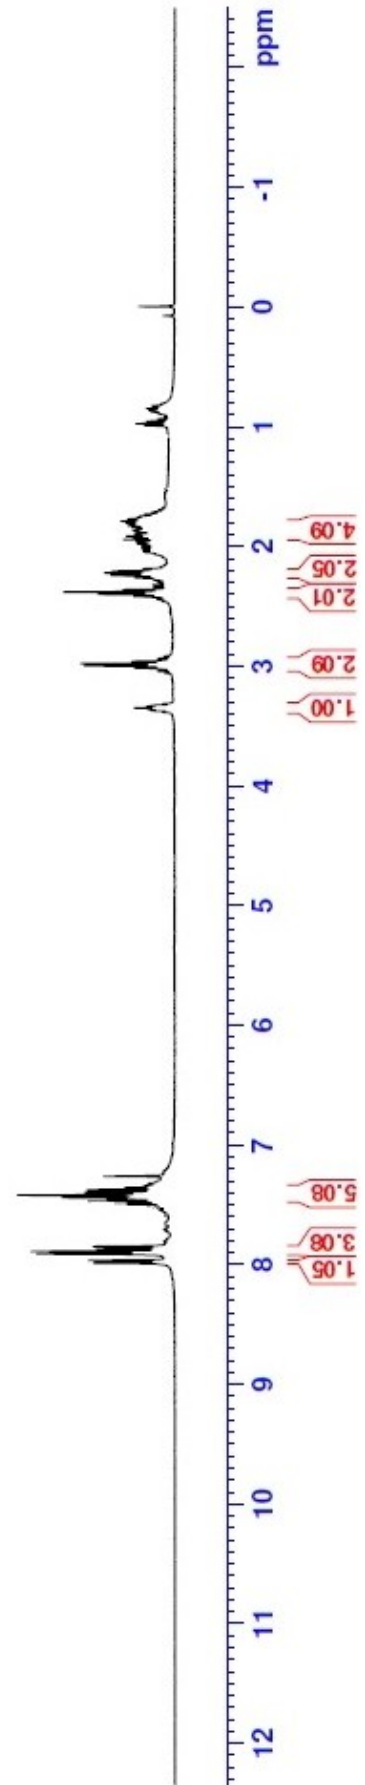

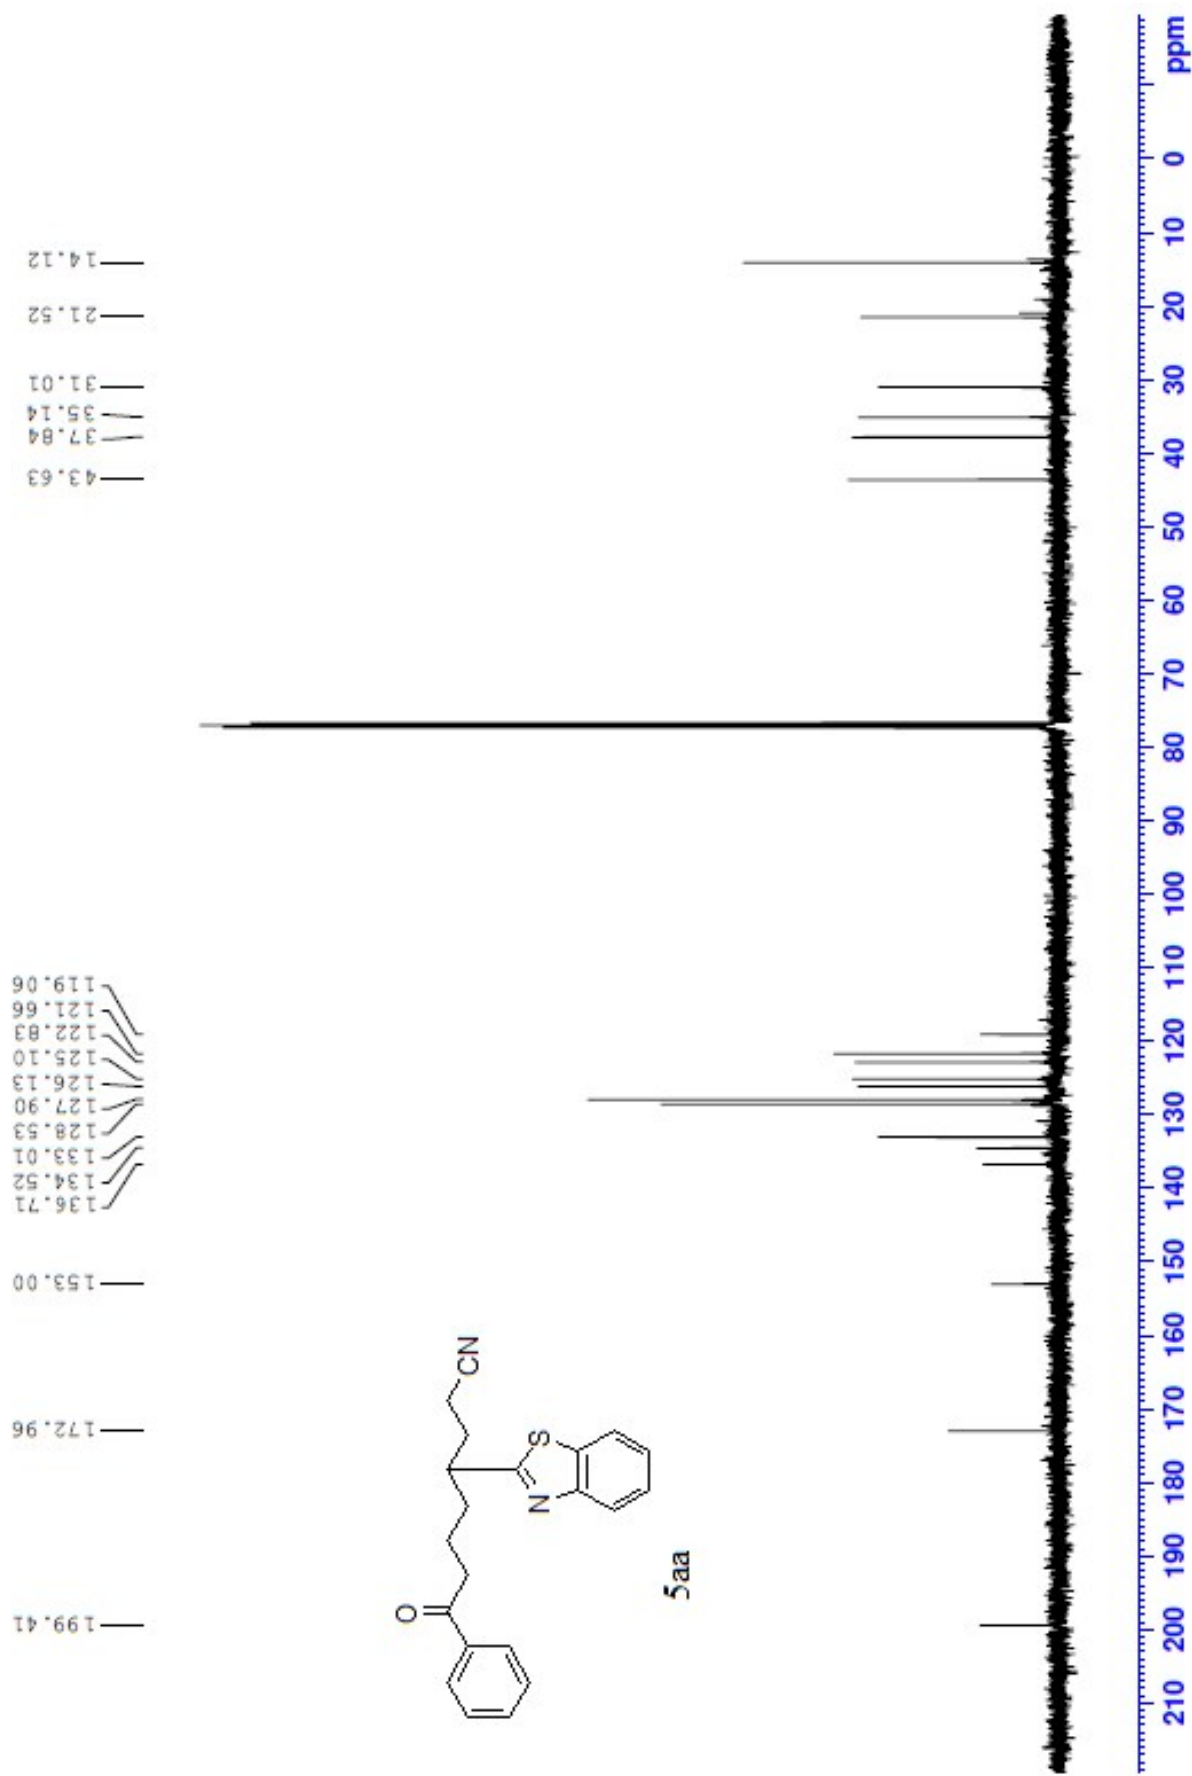



8.512  
 8.501  
 8.486  
 8.484  
 8.469  
 8.456  
 8.453  
 8.444  
 7.908  
 7.889  
 7.858  
 7.839  
 7.783  
 7.762  
 7.727  
 7.712  
 7.701  
 7.692  
 7.540  
 7.532  
 7.525  
 7.515  
 7.260  
 3.746  
 3.730  
 3.710  
 3.693  
 3.668  
 3.661  
 3.655  
 3.647  
 3.640  
 3.632  
 3.623  
 3.031  
 3.018  
 2.997  
 2.984  
 2.483  
 2.467  
 2.448  
 2.436  
 2.419  
 2.408  
 2.364  
 2.346  
 2.336  
 2.325  
 2.313  
 2.304  
 2.293  
 2.263  
 2.151  
 2.116  
 2.089  
 2.043  
 2.012

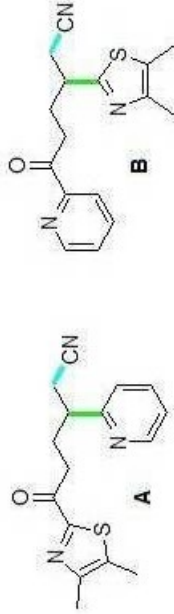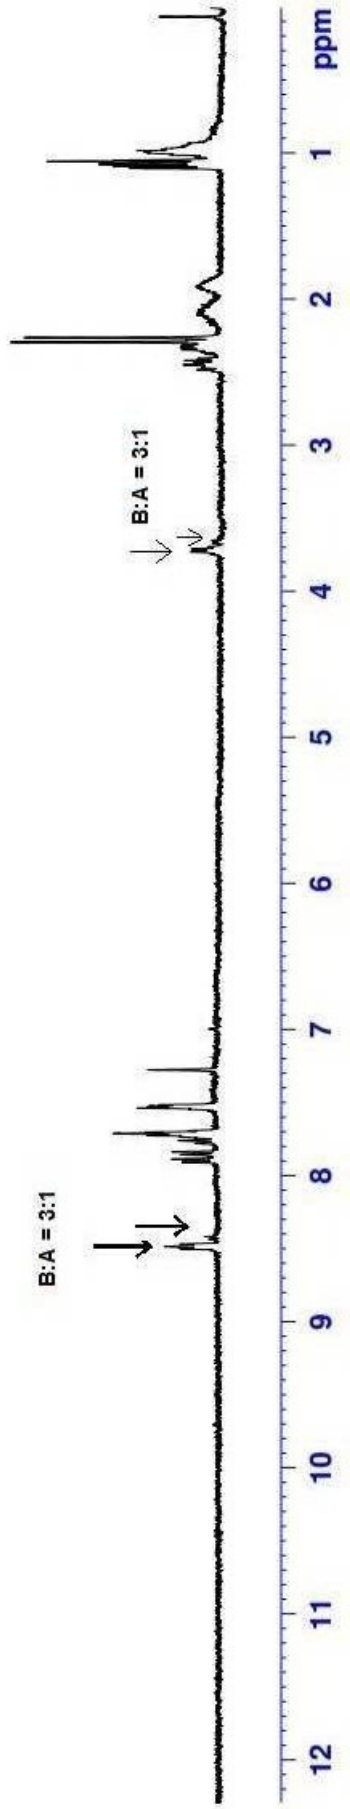

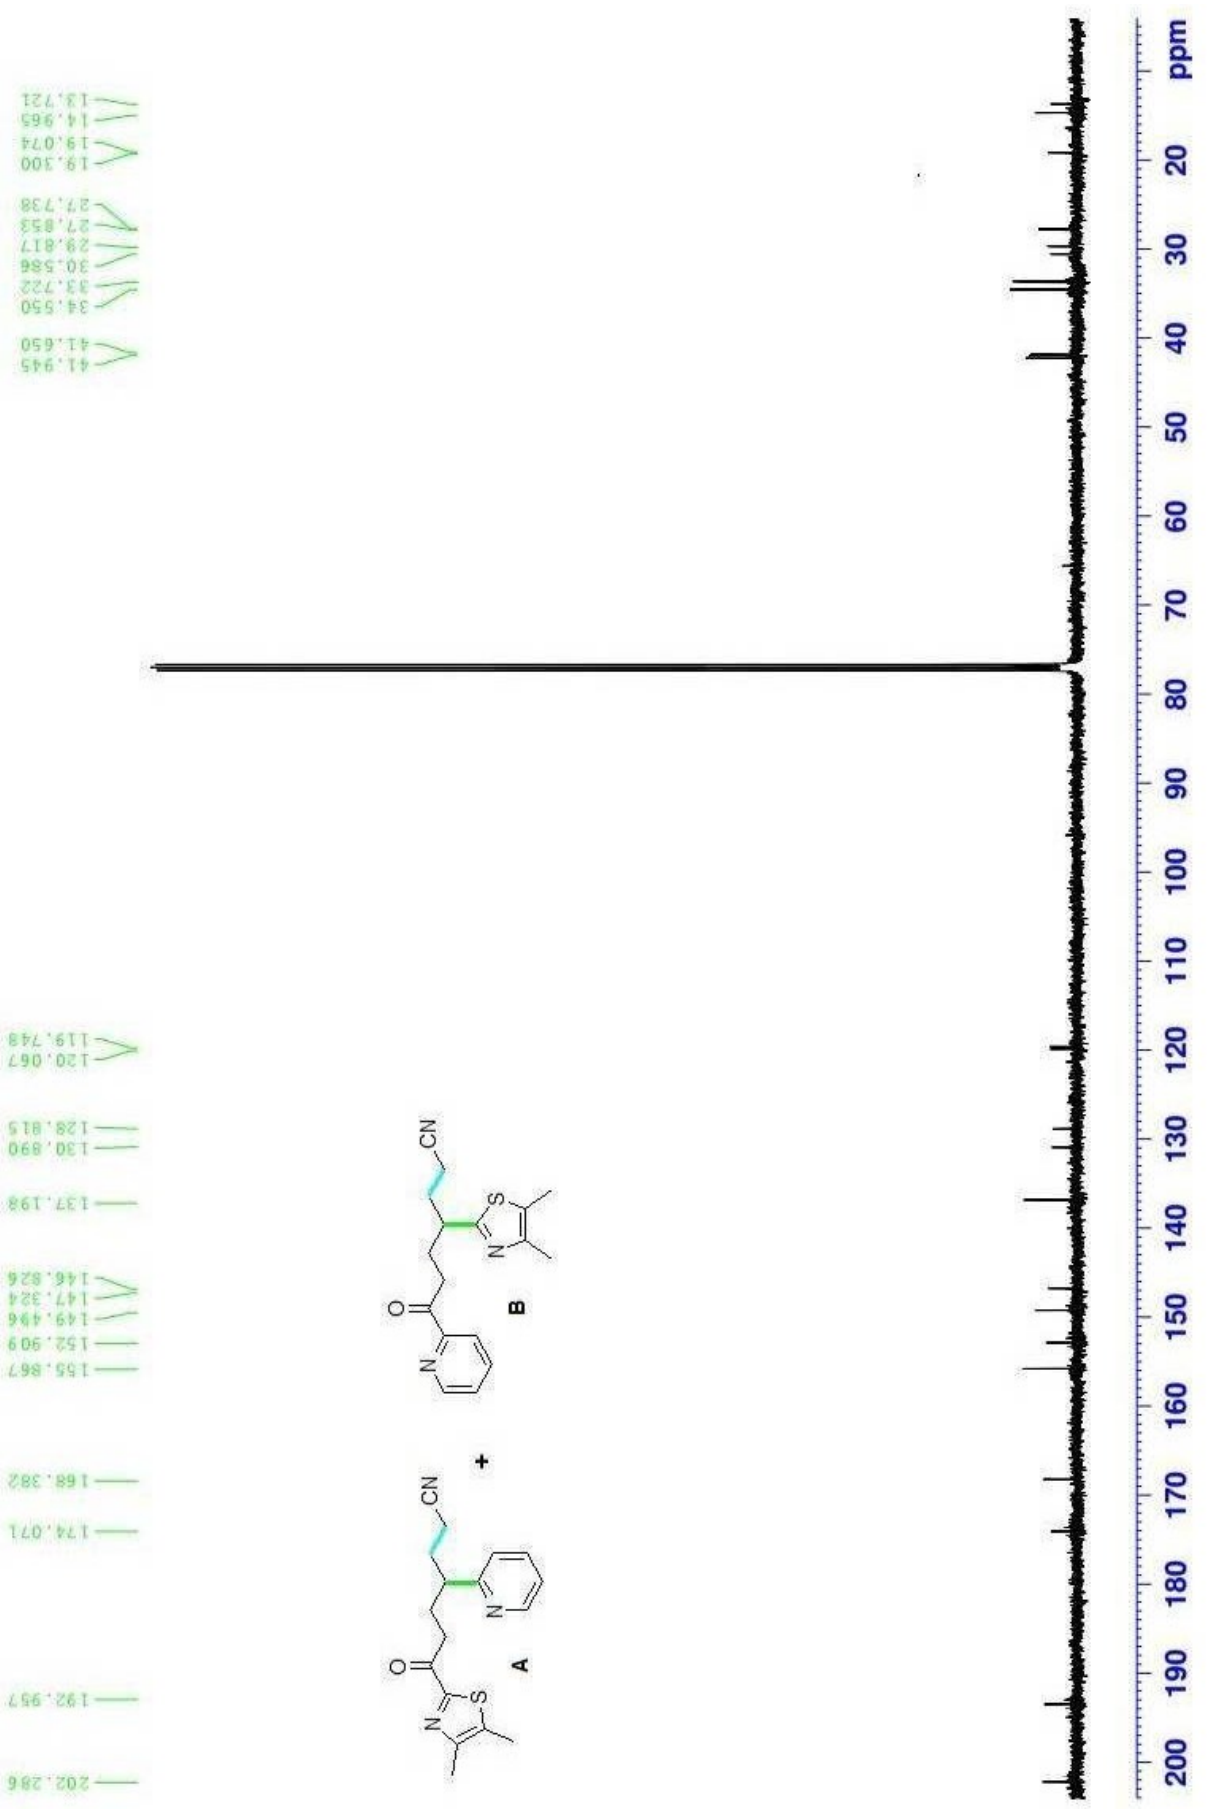

## (F) Computational studies

### 1) Computational Methods

All structures were optimized at the level of M06-2X/def2-SVP<sup>1</sup> with solvent acetonitrile in the PCM solvent model. Vibrational analyses were performed on all optimized geometries, to ensure that the optimized structures corresponded to local minima<sup>2</sup>. And further single-point energies were obtained with def2-TZVP. Solvent effect was also considered using SMD model with CH<sub>3</sub>CN as the solvent for the single-point energy calculation at larger basis set. The solution-phase Gibbs free energy was determined by adding the solvation single-point energy and the gas-phase thermal correction to the Gibbs free energy obtained from vibrational frequency calculation<sup>3</sup>. Unless otherwise specified, the solution-phase Gibbs free energy was used in the discussion. The Gaussian 09 suite of programs<sup>4</sup> was used throughout.

### References

1. Zhao, Y.; Truhlar, D. G. *Theor. Chem. Acc.* **2008**, *120*, 215–241.
2. Hariharan, P. C.; Pople, J. A. *Theor. Chim. Acta.* **1973**, *28*, 213-222.
3. Marenich, A. V.; Cramer, C. J.; Truhlar, D. G. *J. Phys. Chem. B* **2009**, *113*, 6378-6396.
4. Gaussian 09, Revision C.01, Frisch, M. J.; Trucks, G. W.; Schlegel, H. B.; Scuseria, G. E.; Robb, M. A.; Cheeseman, J. R.; Scalmani, G.; Barone, V.; Mennucci, B.; Petersson, G. A.; Nakatsuji, H.; Caricato, M.; Li, X.; Hratchian, H. P.; Izmaylov, A. F.; Bloino, J.; Zheng, G.; Sonnenberg, J. L.; Hada, M.; Ehara, M.; Toyota, K.; Fukuda, R.; Hasegawa, J.; Ishida, M.; Nakajima, T.; Honda, Y.; Kitao, O.; Nakai, H.; Vreven, T.; Montgomery, J. A.; Peralta, J. E.; Ogliaro, F.; Bearpark, M.; Heyd, J. J.; Brothers, E.; Kudin, K. N.; Staroverov, V. N.; Kobayashi, R.; Normand, J.; Raghavachari, K.; Rendell, A.; Burant, J. C.; Iyengar, S. S.; Tomasi, J.; Cossi, M.; Rega, N.; Millam, N. J.; Klene, M.; Knox, J. E.; Cross, J. B.; Bakken, V.; Adamo, C.; Jaramillo, J.; Gomperts, R.; Stratmann, R. E.; Yazyev, O.; Austin, A. J.; Cammi, R.; Pomelli, C.; Ochterski, J. W.; Martin, R. L.; Morokuma, K.; Zakrzewski, V. G.; Voth, G. A.; Salvador, P.; Dannenberg, J. J.; Dapprich, S.; Daniels, A. D.; Farkas, O.; Foresman, J. B.; Ortiz, J.V.; Cioslowski, J.; Fox, D. J.; Gaussian, Inc., Wallingford CT, **2010**.

### For example of 1k

The generated  $\text{CH}_2\text{CN}$  radical is ready to attack the terminal carbon of alkenyl moiety to afford intermediate **INT0** or **INT0'** without transition states. Subsequently, the formed alkyl radical might undergo radical nucleophilic attack to either C of 2-pyridyl moiety (**path-I**) or C of phenyl moiety (**path-II**). Computational results show that the energy barriers for **path-I** and **path-II** are 52.9 and 58.4 kJ/mol, respectively, relative to **INT0** and **INT0'**, suggesting that **path-I** is more favorable than **path-II** (Figure S1). Next, the formed radical addition intermediate (**INT1**) could undergo C-C bond cleavage to afford the heteroaryl ring migration intermediate **INT2**. The distance between cyano moiety and pyridyl group in **INT1**, **TS2** and **INT2** are 3.42 – 2.98 Å, suggesting there are pi-pi stacking interactions

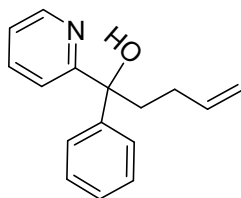

**1k**

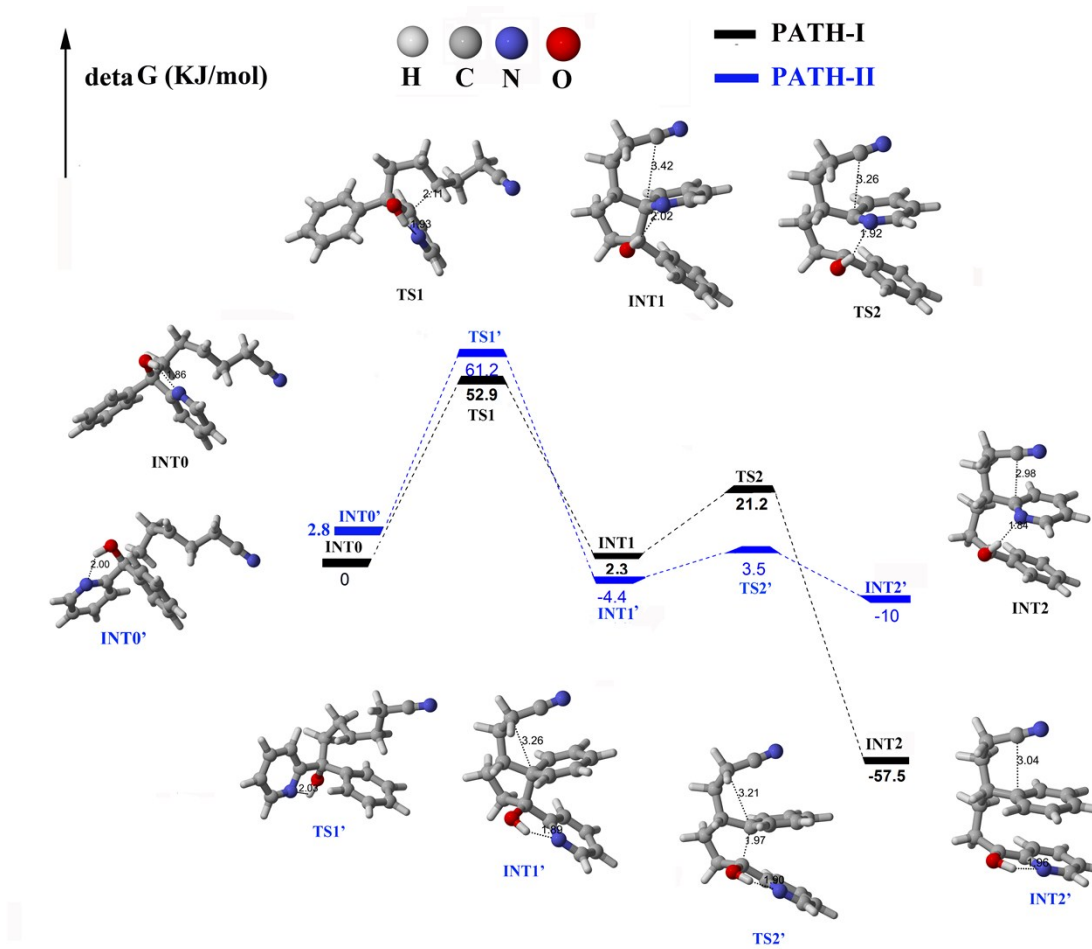

Figure S1. Energy profile (kJ/mol) for the  $\text{CH}_2\text{CN}$  radical attacking 1ab. Bond lengths are shown in Å.

## 2) Cartesian Coordinates of Stationary Points

### 1ab

| Center Number | Atomic Number | Atomic Type | Coordinates (Angstroms) |           |           |
|---------------|---------------|-------------|-------------------------|-----------|-----------|
|               |               |             | X                       | Y         | Z         |
| 1             | 6             | 0           | -2.891610               | -1.817261 | -0.300822 |
| 2             | 6             | 0           | -1.683660               | -2.340072 | 0.432956  |
| 3             | 6             | 0           | -0.300203               | -1.914692 | -0.062291 |
| 4             | 6             | 0           | 0.225631                | -0.619808 | 0.601532  |
| 5             | 1             | 0           | -3.841444               | -1.987254 | 0.219623  |
| 6             | 1             | 0           | -1.747368               | -3.441230 | 0.409939  |
| 7             | 1             | 0           | -1.774731               | -2.082066 | 1.499640  |
| 8             | 1             | 0           | 0.429275                | -2.701377 | 0.182569  |
| 9             | 1             | 0           | -0.297624               | -1.810852 | -1.157011 |
| 10            | 6             | 0           | -2.933952               | -1.232070 | -1.498169 |
| 11            | 1             | 0           | -3.886302               | -0.928038 | -1.937839 |

|    |   |   |           |           |           |
|----|---|---|-----------|-----------|-----------|
| 12 | 1 | 0 | -2.035238 | -1.025842 | -2.084101 |
| 13 | 8 | 0 | 0.201000  | -0.774974 | 1.999522  |
| 14 | 1 | 0 | -0.582509 | -0.274927 | 2.297576  |
| 15 | 6 | 0 | 1.661153  | -0.294365 | 0.183625  |
| 16 | 6 | 0 | 2.382400  | 0.613962  | 0.970072  |
| 17 | 6 | 0 | 2.275845  | -0.837505 | -0.947570 |
| 18 | 6 | 0 | 3.682050  | 0.978014  | 0.629891  |
| 19 | 1 | 0 | 1.908917  | 1.026886  | 1.862258  |
| 20 | 6 | 0 | 3.581780  | -0.474337 | -1.290031 |
| 21 | 1 | 0 | 1.748295  | -1.553539 | -1.577841 |
| 22 | 6 | 0 | 4.287914  | 0.433524  | -0.505387 |
| 23 | 1 | 0 | 4.228672  | 1.687234  | 1.253856  |
| 24 | 1 | 0 | 4.046553  | -0.911120 | -2.175442 |
| 25 | 1 | 0 | 5.307860  | 0.714588  | -0.772706 |
| 26 | 6 | 0 | -0.697109 | 0.551643  | 0.232630  |
| 27 | 6 | 0 | -0.652097 | 1.189401  | -1.010543 |
| 28 | 6 | 0 | -2.485165 | 1.825369  | 0.910475  |
| 29 | 6 | 0 | -1.592309 | 2.176407  | -1.281202 |
| 30 | 1 | 0 | 0.103374  | 0.908914  | -1.746493 |
| 31 | 6 | 0 | -2.538402 | 2.497893  | -0.306175 |
| 32 | 1 | 0 | -3.195122 | 2.058685  | 1.708566  |
| 33 | 1 | 0 | -1.590082 | 2.692713  | -2.242490 |
| 34 | 1 | 0 | -3.294796 | 3.263383  | -0.478374 |
| 35 | 7 | 0 | -1.581332 | 0.878144  | 1.169736  |

-----  
M06-2X/def2-TZVP/SMD//M06-2X/def2-SVP G=-748.7762193770

### CH<sub>2</sub>CN

| Center<br>Number | Atomic<br>Number | Atomic<br>Type | Coordinates (Angstroms) |           |           |
|------------------|------------------|----------------|-------------------------|-----------|-----------|
|                  |                  |                | X                       | Y         | Z         |
| 1                | 6                | 0              | -0.001923               | -1.201538 | 0.000000  |
| 2                | 1                | 0              | -0.002117               | -1.741079 | 0.946170  |
| 3                | 1                | 0              | -0.002117               | -1.741079 | -0.946170 |
| 4                | 6                | 0              | 0.000000                | 0.195368  | 0.000000  |
| 5                | 7                | 0              | 0.002253                | 1.359882  | 0.000000  |

-----  
M06-2X/def2-TZVP/SMD//M06-2X/def2-SVP G= -132.0849274170

### INT0

| Center | Atomic | Atomic | Coordinates (Angstroms) |  |  |
|--------|--------|--------|-------------------------|--|--|
|--------|--------|--------|-------------------------|--|--|

| Number | Number | Type | X         | Y         | Z         |
|--------|--------|------|-----------|-----------|-----------|
| 1      | 6      | 0    | 2.027783  | -1.017279 | -1.180308 |
| 2      | 6      | 0    | 1.027733  | -2.118362 | -1.041323 |
| 3      | 6      | 0    | -0.183410 | -1.786923 | -0.155797 |
| 4      | 6      | 0    | -0.985888 | -0.565488 | -0.653206 |
| 5      | 1      | 0    | 2.247330  | -0.608158 | -2.169011 |
| 6      | 1      | 0    | 1.510523  | -3.013536 | -0.604983 |
| 7      | 1      | 0    | 0.656033  | -2.403213 | -2.033449 |
| 8      | 1      | 0    | -0.855113 | -2.659094 | -0.140190 |
| 9      | 1      | 0    | 0.139827  | -1.619317 | 0.883101  |
| 10     | 6      | 0    | 2.848325  | -0.537975 | -0.029587 |
| 11     | 1      | 0    | 2.867341  | 0.565228  | 0.002350  |
| 12     | 1      | 0    | 2.414331  | -0.876707 | 0.924604  |
| 13     | 6      | 0    | 4.304340  | -1.047673 | -0.121223 |
| 14     | 8      | 0    | -1.137264 | -0.643592 | -2.045068 |
| 15     | 1      | 0    | -0.690351 | 0.151516  | -2.397511 |
| 16     | 6      | 0    | -2.368715 | -0.488994 | 0.007917  |
| 17     | 6      | 0    | -3.404281 | 0.161140  | -0.673455 |
| 18     | 6      | 0    | -2.624489 | -1.010181 | 1.280713  |
| 19     | 6      | 0    | -4.665707 | 0.290367  | -0.095225 |
| 20     | 1      | 0    | -3.210992 | 0.555870  | -1.671538 |
| 21     | 6      | 0    | -3.887817 | -0.879918 | 1.861707  |
| 22     | 1      | 0    | -1.841948 | -1.531380 | 1.834230  |
| 23     | 6      | 0    | -4.912493 | -0.229306 | 1.176645  |
| 24     | 1      | 0    | -5.462345 | 0.798529  | -0.641626 |
| 25     | 1      | 0    | -4.068913 | -1.295903 | 2.854262  |
| 26     | 1      | 0    | -5.900254 | -0.129467 | 1.629483  |
| 27     | 6      | 0    | -0.243679 | 0.743206  | -0.317561 |
| 28     | 6      | 0    | 0.057267  | 1.121850  | 0.995486  |
| 29     | 6      | 0    | 0.731213  | 2.646039  | -1.166790 |
| 30     | 6      | 0    | 0.735744  | 2.317003  | 1.202155  |
| 31     | 1      | 0    | -0.238422 | 0.495053  | 1.838167  |
| 32     | 6      | 0    | 1.088387  | 3.098318  | 0.099788  |
| 33     | 1      | 0    | 0.978032  | 3.229487  | -2.057862 |
| 34     | 1      | 0    | 0.988934  | 2.638430  | 2.213612  |
| 35     | 1      | 0    | 1.621884  | 4.041108  | 0.217978  |
| 36     | 7      | 0    | 0.077925  | 1.498956  | -1.362871 |
| 37     | 1      | 0    | 4.772203  | -0.701188 | -1.053901 |
| 38     | 1      | 0    | 4.327167  | -2.146967 | -0.132384 |
| 39     | 6      | 0    | 5.128126  | -0.587318 | 0.999759  |
| 40     | 7      | 0    | 5.751819  | -0.212184 | 1.895307  |

M06-2X/def2-TZVP/SMD//M06-2X/def2-SVP G= -881.7156345060

INT0'

| Center<br>Number | Atomic<br>Number | Atomic<br>Type | Coordinates (Angstroms) |           |           |
|------------------|------------------|----------------|-------------------------|-----------|-----------|
|                  |                  |                | X                       | Y         | Z         |
| 1                | 6                | 0              | 1.981223                | -1.457872 | -0.896717 |
| 2                | 6                | 0              | 0.889051                | -2.410298 | -0.535510 |
| 3                | 6                | 0              | -0.288566               | -1.810719 | 0.252372  |
| 4                | 6                | 0              | -1.012018               | -0.676797 | -0.491154 |
| 5                | 1                | 0              | 2.201045                | -1.262595 | -1.948887 |
| 6                | 1                | 0              | 1.299877                | -3.229171 | 0.085072  |
| 7                | 1                | 0              | 0.487998                | -2.870426 | -1.447461 |
| 8                | 1                | 0              | -1.015462               | -2.613956 | 0.450342  |
| 9                | 1                | 0              | 0.058293                | -1.440493 | 1.229516  |
| 10               | 6                | 0              | 2.793164                | -0.736377 | 0.125799  |
| 11               | 1                | 0              | 2.637420                | 0.355912  | 0.047733  |
| 12               | 1                | 0              | 2.482182                | -1.026711 | 1.142180  |
| 13               | 6                | 0              | 4.299013                | -1.022597 | -0.043180 |
| 14               | 8                | 0              | -1.188508               | -1.078533 | -1.825993 |
| 15               | 1                | 0              | -1.983239               | -0.606715 | -2.131217 |
| 16               | 6                | 0              | -2.402189               | -0.406840 | 0.106922  |
| 17               | 6                | 0              | -2.727624               | -0.614161 | 1.449912  |
| 18               | 6                | 0              | -4.517053               | 0.365561  | -0.361772 |
| 19               | 6                | 0              | -4.015482               | -0.300063 | 1.878208  |
| 20               | 1                | 0              | -1.996504               | -1.022090 | 2.147832  |
| 21               | 6                | 0              | -4.932514               | 0.203385  | 0.958666  |
| 22               | 1                | 0              | -5.208436               | 0.748613  | -1.117680 |
| 23               | 1                | 0              | -4.299987               | -0.453806 | 2.920262  |
| 24               | 1                | 0              | -5.950605               | 0.459426  | 1.251230  |
| 25               | 6                | 0              | -0.211958               | 0.635957  | -0.414118 |
| 26               | 6                | 0              | 0.031941                | 1.255288  | 0.817858  |
| 27               | 6                | 0              | 1.045656                | 2.400058  | -1.504354 |
| 28               | 6                | 0              | 0.777278                | 2.431121  | 0.890324  |
| 29               | 1                | 0              | -0.363039               | 0.819383  | 1.738859  |
| 30               | 6                | 0              | 1.292095                | 3.006631  | -0.272584 |
| 31               | 1                | 0              | 1.441919                | 2.843119  | -2.419881 |
| 32               | 1                | 0              | 0.957464                | 2.898294  | 1.860022  |
| 33               | 1                | 0              | 1.879261                | 3.924769  | -0.219157 |
| 34               | 1                | 0              | 4.632186                | -0.728240 | -1.049195 |
| 35               | 1                | 0              | 4.504728                | -2.097081 | 0.067223  |
| 36               | 6                | 0              | 5.117002                | -0.298843 | 0.933895  |
| 37               | 7                | 0              | 5.735388                | 0.281260  | 1.716708  |
| 38               | 6                | 0              | 0.294484                | 1.225646  | -1.574502 |



|    |   |   |           |          |           |
|----|---|---|-----------|----------|-----------|
| 39 | 1 | 0 | 0.110466  | 0.742424 | -2.533777 |
| 40 | 7 | 0 | -3.285177 | 0.069187 | -0.771773 |

-----  
M06-2X/def2-TZVP/SMD//M06-2X/def2-SVP G= -881.7145952

TS1

| Center<br>Number | Atomic<br>Number | Atomic<br>Type | Coordinates (Angstroms) |           |           |
|------------------|------------------|----------------|-------------------------|-----------|-----------|
|                  |                  |                | X                       | Y         | Z         |
| 1                | 6                | 0              | -1.854622               | -0.684636 | -0.027057 |
| 2                | 6                | 0              | -1.303638               | -2.048459 | -0.372805 |
| 3                | 6                | 0              | 0.202534                | -1.941592 | -0.653776 |
| 4                | 6                | 0              | 0.745356                | -0.882738 | 0.300941  |
| 5                | 1                | 0              | -2.104840               | -0.534997 | 1.027947  |
| 6                | 1                | 0              | -1.822999               | -2.475409 | -1.245189 |
| 7                | 1                | 0              | -1.455826               | -2.726407 | 0.476981  |
| 8                | 1                | 0              | 0.723776                | -2.897371 | -0.500494 |
| 9                | 1                | 0              | 0.371585                | -1.636944 | -1.695548 |
| 10               | 6                | 0              | -2.784387               | 0.002576  | -0.982706 |
| 11               | 1                | 0              | -2.851977               | 1.074724  | -0.742037 |
| 12               | 1                | 0              | -2.406514               | -0.078987 | -2.012996 |
| 13               | 8                | 0              | 0.478853                | -1.308575 | 1.613071  |
| 14               | 1                | 0              | 0.193817                | -0.505100 | 2.089255  |
| 15               | 6                | 0              | 2.238483                | -0.591638 | 0.121430  |
| 16               | 6                | 0              | 3.013204                | -0.280427 | 1.244154  |
| 17               | 6                | 0              | 2.854137                | -0.586512 | -1.136799 |
| 18               | 6                | 0              | 4.366138                | 0.033513  | 1.115159  |
| 19               | 1                | 0              | 2.549044                | -0.298748 | 2.229912  |
| 20               | 6                | 0              | 4.207614                | -0.274754 | -1.267588 |
| 21               | 1                | 0              | 2.285258                | -0.832460 | -2.034599 |
| 22               | 6                | 0              | 4.969387                | 0.038461  | -0.141975 |
| 23               | 1                | 0              | 4.952310                | 0.272864  | 2.004224  |
| 24               | 1                | 0              | 4.668480                | -0.281288 | -2.256700 |
| 25               | 1                | 0              | 6.028354                | 0.280448  | -0.244357 |
| 26               | 6                | 0              | -0.057323               | 0.424598  | 0.062478  |
| 27               | 6                | 0              | -0.011733               | 1.089038  | -1.201959 |
| 28               | 6                | 0              | -0.616232               | 2.416861  | 1.112200  |
| 29               | 6                | 0              | -0.383076               | 2.416454  | -1.278254 |
| 30               | 1                | 0              | 0.272186                | 0.541514  | -2.101721 |
| 31               | 6                | 0              | -0.728458               | 3.102315  | -0.103854 |
| 32               | 1                | 0              | -0.804016               | 2.942040  | 2.054292  |
| 33               | 1                | 0              | -0.392299               | 2.930049  | -2.241126 |
| 34               | 1                | 0              | -1.025296               | 4.150327  | -0.119862 |

|    |   |   |           |           |           |
|----|---|---|-----------|-----------|-----------|
| 35 | 7 | 0 | -0.247581 | 1.150522  | 1.204286  |
| 36 | 6 | 0 | -4.202010 | -0.604139 | -0.961672 |
| 37 | 1 | 0 | -4.846882 | -0.101882 | -1.696531 |
| 38 | 1 | 0 | -4.174403 | -1.671639 | -1.225717 |
| 39 | 6 | 0 | -4.835883 | -0.482086 | 0.354584  |
| 40 | 7 | 0 | -5.310638 | -0.373828 | 1.400669  |

-----  
M06-2X/def2-TZVP/SMD//M06-2X/def2-SVP G= -881.6945548010

TS1'

| Center<br>Number | Atomic<br>Number | Atomic<br>Type | Coordinates (Angstroms) |           |           |
|------------------|------------------|----------------|-------------------------|-----------|-----------|
|                  |                  |                | X                       | Y         | Z         |
| 1                | 6                | 0              | 1.009299                | -0.869664 | 0.301607  |
| 2                | 6                | 0              | 0.628871                | -1.265123 | 1.704956  |
| 3                | 6                | 0              | -0.587028               | -0.453886 | 2.207706  |
| 4                | 6                | 0              | -1.179120               | 0.431713  | 1.104514  |
| 5                | 1                | 0              | 0.437361                | -1.348212 | -0.502395 |
| 6                | 1                | 0              | 1.485307                | -1.094187 | 2.374458  |
| 7                | 1                | 0              | 0.415808                | -2.346664 | 1.752619  |
| 8                | 1                | 0              | -1.376366               | -1.092898 | 2.627673  |
| 9                | 1                | 0              | -0.280951               | 0.227082  | 3.013650  |
| 10               | 6                | 0              | 2.439700                | -0.604184 | -0.043818 |
| 11               | 1                | 0              | 2.493970                | -0.013724 | -0.972978 |
| 12               | 1                | 0              | 2.918009                | -0.011462 | 0.751084  |
| 13               | 8                | 0              | -1.864868               | 1.483828  | 1.745253  |
| 14               | 1                | 0              | -2.507501               | 1.806641  | 1.091523  |
| 15               | 6                | 0              | -0.023091               | 1.025720  | 0.249881  |
| 16               | 6                | 0              | 0.876932                | 1.891164  | 0.941937  |
| 17               | 6                | 0              | -0.145010               | 1.230944  | -1.156065 |
| 18               | 6                | 0              | 1.719056                | 2.752310  | 0.258511  |
| 19               | 1                | 0              | 0.916258                | 1.852485  | 2.032714  |
| 20               | 6                | 0              | 0.703884                | 2.095750  | -1.831754 |
| 21               | 1                | 0              | -0.883801               | 0.660222  | -1.721535 |
| 22               | 6                | 0              | 1.653580                | 2.855885  | -1.137967 |
| 23               | 1                | 0              | 2.423370                | 3.371529  | 0.817626  |
| 24               | 1                | 0              | 0.614587                | 2.195018  | -2.915332 |
| 25               | 1                | 0              | 2.312849                | 3.539524  | -1.674082 |
| 26               | 6                | 0              | -2.190499               | -0.308022 | 0.223253  |
| 27               | 6                | 0              | -2.177113               | -1.686430 | -0.002459 |
| 28               | 6                | 0              | -4.042053               | -0.041266 | -1.119344 |
| 29               | 6                | 0              | -3.147154               | -2.238211 | -0.837976 |
| 30               | 1                | 0              | -1.432446               | -2.325091 | 0.471748  |

|    |   |   |           |           |           |
|----|---|---|-----------|-----------|-----------|
| 31 | 6 | 0 | -4.098631 | -1.402724 | -1.415941 |
| 32 | 1 | 0 | -4.777993 | 0.649507  | -1.540587 |
| 33 | 1 | 0 | -3.160181 | -3.312302 | -1.028647 |
| 34 | 1 | 0 | -4.874074 | -1.792206 | -2.075104 |
| 35 | 7 | 0 | -3.114898 | 0.486067  | -0.323592 |
| 36 | 6 | 0 | 3.229063  | -1.916253 | -0.234137 |
| 37 | 1 | 0 | 2.789538  | -2.518901 | -1.041951 |
| 38 | 1 | 0 | 3.197931  | -2.524960 | 0.681750  |
| 39 | 6 | 0 | 4.635970  | -1.672314 | -0.563047 |
| 40 | 7 | 0 | 5.738802  | -1.449564 | -0.819750 |

-----  
M06-2X/def2-TZVP/SMD//M06-2X/def2-SVP G= -881.6880684

INT1

| Center<br>Number | Atomic<br>Number | Atomic<br>Type | Coordinates (Angstroms) |           |           |
|------------------|------------------|----------------|-------------------------|-----------|-----------|
|                  |                  |                | X                       | Y         | Z         |
| 1                | 6                | 0              | 1.736989                | 1.425453  | 0.064936  |
| 2                | 6                | 0              | 1.130995                | 2.581511  | -0.749889 |
| 3                | 6                | 0              | -0.402171               | 2.450877  | -0.627270 |
| 4                | 6                | 0              | -0.651591               | 1.264154  | 0.308325  |
| 5                | 1                | 0              | 1.810866                | 1.739009  | 1.115568  |
| 6                | 1                | 0              | 1.443388                | 2.507835  | -1.803233 |
| 7                | 1                | 0              | 1.503157                | 3.546610  | -0.380771 |
| 8                | 1                | 0              | -0.873705               | 3.336982  | -0.181674 |
| 9                | 1                | 0              | -0.867352               | 2.289984  | -1.607313 |
| 10               | 6                | 0              | 3.130229                | 1.028808  | -0.407488 |
| 11               | 1                | 0              | 3.102855                | 0.665353  | -1.446919 |
| 12               | 1                | 0              | 3.744847                | 1.941123  | -0.415386 |
| 13               | 6                | 0              | 3.844740                | 0.004811  | 0.491909  |
| 14               | 8                | 0              | -0.535468               | 1.741636  | 1.626925  |
| 15               | 1                | 0              | -0.150451               | 1.012056  | 2.143448  |
| 16               | 6                | 0              | -1.962415               | 0.516761  | 0.113176  |
| 17               | 6                | 0              | -2.675601               | 0.064243  | 1.229592  |
| 18               | 6                | 0              | -2.471635               | 0.225767  | -1.160579 |
| 19               | 6                | 0              | -3.855688               | -0.665870 | 1.081096  |
| 20               | 1                | 0              | -2.308716               | 0.299720  | 2.228247  |
| 21               | 6                | 0              | -3.651797               | -0.499761 | -1.312067 |
| 22               | 1                | 0              | -1.942016               | 0.558159  | -2.054374 |
| 23               | 6                | 0              | -4.348116               | -0.952452 | -0.190574 |
| 24               | 1                | 0              | -4.394306               | -1.006764 | 1.967043  |
| 25               | 1                | 0              | -4.029614               | -0.711464 | -2.313738 |
| 26               | 1                | 0              | -5.272958               | -1.519395 | -0.308777 |

|    |   |   |           |           |           |
|----|---|---|-----------|-----------|-----------|
| 27 | 6 | 0 | 0.639319  | 0.323484  | 0.049070  |
| 28 | 6 | 0 | 0.562741  | -0.359329 | -1.272995 |
| 29 | 6 | 0 | 0.454065  | -1.806887 | 1.063130  |
| 30 | 6 | 0 | 0.308963  | -1.700803 | -1.361388 |
| 31 | 1 | 0 | 0.686538  | 0.241057  | -2.177987 |
| 32 | 6 | 0 | 0.184883  | -2.455203 | -0.179824 |
| 33 | 1 | 0 | 0.460860  | -2.414562 | 1.976588  |
| 34 | 1 | 0 | 0.217130  | -2.183678 | -2.335908 |
| 35 | 1 | 0 | -0.041896 | -3.519967 | -0.198015 |
| 36 | 7 | 0 | 0.726025  | -0.546414 | 1.198484  |
| 37 | 1 | 0 | 4.933615  | 0.147781  | 0.444413  |
| 38 | 1 | 0 | 3.544765  | 0.137273  | 1.542112  |
| 39 | 6 | 0 | 3.600915  | -1.393531 | 0.128750  |
| 40 | 7 | 0 | 3.455086  | -2.498215 | -0.172226 |

-----  
M06-2X/def2-TZVP/SMD//M06-2X/def2-SVP G= -881.7147139390

INT1'

| Center<br>Number | Atomic<br>Number | Atomic<br>Type | Coordinates (Angstroms) |           |           |
|------------------|------------------|----------------|-------------------------|-----------|-----------|
|                  |                  |                | X                       | Y         | Z         |
| 1                | 6                | 0              | -1.668756               | 1.476253  | -0.101695 |
| 2                | 6                | 0              | -1.076418               | 2.606384  | 0.766462  |
| 3                | 6                | 0              | 0.451274                | 2.394408  | 0.780405  |
| 4                | 6                | 0              | 0.711869                | 1.270330  | -0.225216 |
| 5                | 1                | 0              | -1.690810               | 1.819881  | -1.147058 |
| 6                | 1                | 0              | -1.485987               | 2.556814  | 1.787113  |
| 7                | 1                | 0              | -1.357514               | 3.588281  | 0.362280  |
| 8                | 1                | 0              | 1.016244                | 3.282492  | 0.468562  |
| 9                | 1                | 0              | 0.800164                | 2.111515  | 1.781863  |
| 10               | 6                | 0              | -3.090755               | 1.117320  | 0.315355  |
| 11               | 1                | 0              | -3.104281               | 0.753512  | 1.354570  |
| 12               | 1                | 0              | -3.678395               | 2.047294  | 0.306289  |
| 13               | 6                | 0              | -3.813328               | 0.111359  | -0.599733 |
| 14               | 8                | 0              | 0.698930                | 1.820321  | -1.513403 |
| 15               | 1                | 0              | 1.349876                | 1.294765  | -2.016675 |
| 16               | 6                | 0              | 1.997039                | 0.476781  | -0.041685 |
| 17               | 6                | 0              | 2.490515                | 0.066097  | 1.201944  |
| 18               | 6                | 0              | 3.729096                | -0.569075 | -1.146329 |
| 19               | 6                | 0              | 3.654832                | -0.694873 | 1.238926  |
| 20               | 1                | 0              | 1.973802                | 0.331378  | 2.122993  |
| 21               | 6                | 0              | 4.290845                | -1.025375 | 0.042817  |
| 22               | 1                | 0              | 4.196839                | -0.798223 | -2.107835 |

|    |   |   |           |           |           |
|----|---|---|-----------|-----------|-----------|
| 23 | 1 | 0 | 4.062886  | -1.027705 | 2.194605  |
| 24 | 1 | 0 | 5.204268  | -1.619643 | 0.029541  |
| 25 | 6 | 0 | -0.602808 | 0.340414  | -0.058809 |
| 26 | 6 | 0 | -0.603304 | -0.363920 | 1.261541  |
| 27 | 6 | 0 | -0.474499 | -1.961153 | -1.054036 |
| 28 | 6 | 0 | -0.438389 | -1.715386 | 1.376127  |
| 29 | 1 | 0 | -0.712266 | 0.241154  | 2.166555  |
| 30 | 6 | 0 | -0.324065 | -2.540596 | 0.230426  |
| 31 | 1 | 0 | -0.465359 | -2.605451 | -1.935861 |
| 32 | 1 | 0 | -0.409166 | -2.170846 | 2.368444  |
| 33 | 1 | 0 | -0.180088 | -3.615569 | 0.337580  |
| 34 | 1 | 0 | -4.891344 | 0.326499  | -0.623284 |
| 35 | 1 | 0 | -3.450326 | 0.191314  | -1.635444 |
| 36 | 6 | 0 | -3.690901 | -1.288008 | -0.180791 |
| 37 | 7 | 0 | -3.655570 | -2.388585 | 0.165340  |
| 38 | 7 | 0 | 2.614560  | 0.160503  | -1.181279 |
| 39 | 6 | 0 | -0.660016 | -0.616120 | -1.204817 |
| 40 | 1 | 0 | -0.776294 | -0.182497 | -2.200798 |

-----  
M06-2X/def2-TZVP/SMD//M06-2X/def2-SVP G= -881.71424

TS2

| Center<br>Number | Atomic<br>Number | Atomic<br>Type | Coordinates (Angstroms) |           |           |
|------------------|------------------|----------------|-------------------------|-----------|-----------|
|                  |                  |                | X                       | Y         | Z         |
| 1                | 6                | 0              | 1.776465                | 1.356546  | 0.030716  |
| 2                | 6                | 0              | 1.165263                | 2.488876  | -0.785814 |
| 3                | 6                | 0              | -0.332140               | 2.572337  | -0.455887 |
| 4                | 6                | 0              | -0.730915               | 1.406665  | 0.415551  |
| 5                | 1                | 0              | 1.850002                | 1.682473  | 1.083508  |
| 6                | 1                | 0              | 1.308057                | 2.285338  | -1.863078 |
| 7                | 1                | 0              | 1.694561                | 3.435509  | -0.590211 |
| 8                | 1                | 0              | -0.565068               | 3.486082  | 0.117981  |
| 9                | 1                | 0              | -0.942017               | 2.618375  | -1.369668 |
| 10               | 6                | 0              | 3.181683                | 1.010404  | -0.443777 |
| 11               | 1                | 0              | 3.168997                | 0.697493  | -1.504125 |
| 12               | 1                | 0              | 3.781162                | 1.936359  | -0.414286 |
| 13               | 8                | 0              | -0.488088               | 1.678819  | 1.739644  |
| 14               | 1                | 0              | -0.107984               | 0.858698  | 2.125237  |
| 15               | 6                | 0              | -1.969487               | 0.648476  | 0.150813  |
| 16               | 6                | 0              | -2.665459               | 0.048205  | 1.213531  |
| 17               | 6                | 0              | -2.451925               | 0.444300  | -1.154588 |
| 18               | 6                | 0              | -3.788410               | -0.740822 | 0.979990  |

|    |   |   |           |           |           |
|----|---|---|-----------|-----------|-----------|
| 19 | 1 | 0 | -2.321327 | 0.215831  | 2.237418  |
| 20 | 6 | 0 | -3.575409 | -0.340730 | -1.386389 |
| 21 | 1 | 0 | -1.933695 | 0.895684  | -2.006373 |
| 22 | 6 | 0 | -4.245403 | -0.944583 | -0.320937 |
| 23 | 1 | 0 | -4.313755 | -1.198675 | 1.823523  |
| 24 | 1 | 0 | -3.932333 | -0.485157 | -2.410434 |
| 25 | 1 | 0 | -5.126962 | -1.565158 | -0.505895 |
| 26 | 6 | 0 | 0.785343  | 0.190505  | 0.026431  |
| 27 | 6 | 0 | 0.547504  | -0.459662 | -1.238080 |
| 28 | 6 | 0 | 0.286783  | -1.808586 | 1.121242  |
| 29 | 6 | 0 | 0.088567  | -1.757021 | -1.274800 |
| 30 | 1 | 0 | 0.706879  | 0.096862  | -2.168438 |
| 31 | 6 | 0 | -0.080979 | -2.455990 | -0.072064 |
| 32 | 1 | 0 | 0.207147  | -2.355166 | 2.072036  |
| 33 | 1 | 0 | -0.122424 | -2.242581 | -2.232504 |
| 34 | 1 | 0 | -0.450272 | -3.483853 | -0.051072 |
| 35 | 7 | 0 | 0.755650  | -0.580465 | 1.186142  |
| 36 | 6 | 0 | 3.909280  | -0.038389 | 0.400796  |
| 37 | 1 | 0 | 5.001171  | 0.084124  | 0.306454  |
| 38 | 1 | 0 | 3.674170  | 0.095015  | 1.471286  |
| 39 | 6 | 0 | 3.615336  | -1.417659 | 0.041048  |
| 40 | 7 | 0 | 3.420325  | -2.520255 | -0.261170 |

-----  
M06-2X/def2-TZVP/SMD//M06-2X/def2-SVP G= -881.7071906900

TS2'

| Center<br>Number | Atomic<br>Number | Atomic<br>Type | Coordinates (Angstroms) |          |           |
|------------------|------------------|----------------|-------------------------|----------|-----------|
|                  |                  |                | X                       | Y        | Z         |
| 1                | 6                | 0              | -1.756842               | 1.354724 | -0.073440 |
| 2                | 6                | 0              | -1.212748               | 2.521506 | 0.753198  |
| 3                | 6                | 0              | 0.320077                | 2.476074 | 0.702551  |
| 4                | 6                | 0              | 0.752613                | 1.426044 | -0.283591 |
| 5                | 1                | 0              | -1.768548               | 1.665202 | -1.134677 |
| 6                | 1                | 0              | -1.565715               | 2.444418 | 1.797445  |
| 7                | 1                | 0              | -1.616643               | 3.474164 | 0.372849  |
| 8                | 1                | 0              | 0.754730                | 3.441116 | 0.389783  |
| 9                | 1                | 0              | 0.736495                | 2.250969 | 1.695529  |
| 10               | 6                | 0              | -3.189193               | 1.022720 | 0.324903  |
| 11               | 1                | 0              | -3.226540               | 0.682828 | 1.376312  |
| 12               | 1                | 0              | -3.768040               | 1.962085 | 0.294773  |
| 13               | 8                | 0              | 0.614029                | 1.848107 | -1.573255 |
| 14               | 1                | 0              | 1.237574                | 1.285178 | -2.082588 |

|    |   |   |           |           |           |
|----|---|---|-----------|-----------|-----------|
| 15 | 6 | 0 | 1.985709  | 0.637699  | -0.087454 |
| 16 | 6 | 0 | 2.520301  | 0.301314  | 1.165091  |
| 17 | 6 | 0 | 3.604627  | -0.592705 | -1.176465 |
| 18 | 6 | 0 | 3.639159  | -0.518848 | 1.211984  |
| 19 | 1 | 0 | 2.068723  | 0.674807  | 2.086921  |
| 20 | 6 | 0 | 4.192316  | -0.991005 | 0.021566  |
| 21 | 1 | 0 | 4.019996  | -0.929705 | -2.134834 |
| 22 | 1 | 0 | 4.078928  | -0.793187 | 2.174979  |
| 23 | 1 | 0 | 5.069150  | -1.642541 | 0.018944  |
| 24 | 6 | 0 | -3.908583 | 0.013608  | -0.573977 |
| 25 | 1 | 0 | -4.997254 | 0.189544  | -0.546617 |
| 26 | 1 | 0 | -3.608490 | 0.145057  | -1.628433 |
| 27 | 6 | 0 | -3.717879 | -1.383326 | -0.212531 |
| 28 | 7 | 0 | -3.635200 | -2.499972 | 0.090192  |
| 29 | 6 | 0 | -0.760764 | 0.197442  | 0.011935  |
| 30 | 6 | 0 | -0.673913 | -0.716646 | -1.107506 |
| 31 | 6 | 0 | -0.578855 | -0.413114 | 1.312999  |
| 32 | 6 | 0 | -0.179800 | -1.995277 | -0.958788 |
| 33 | 1 | 0 | -0.927640 | -0.335924 | -2.104122 |
| 34 | 6 | 0 | -0.096196 | -1.696485 | 1.446868  |
| 35 | 1 | 0 | -0.787355 | 0.181748  | 2.211114  |
| 36 | 6 | 0 | 0.145105  | -2.496454 | 0.313510  |
| 37 | 1 | 0 | -0.060598 | -2.635523 | -1.838942 |
| 38 | 1 | 0 | 0.081811  | -2.106853 | 2.446527  |
| 39 | 1 | 0 | 0.532766  | -3.513193 | 0.426252  |
| 40 | 7 | 0 | 2.538572  | 0.198732  | -1.230234 |

-----  
M06-2X/def2-TZVP/SMD//M06-2X/def2-SVP G= -881.7110438

INT2

| Center<br>Number | Atomic<br>Number | Atomic<br>Type | Coordinates (Angstroms) |          |           |
|------------------|------------------|----------------|-------------------------|----------|-----------|
|                  |                  |                | X                       | Y        | Z         |
| 1                | 6                | 0              | 1.569452                | 1.296014 | -0.122160 |
| 2                | 6                | 0              | 0.642727                | 2.271826 | -0.871406 |
| 3                | 6                | 0              | -0.532283               | 2.782362 | -0.007532 |
| 4                | 6                | 0              | -1.170420               | 1.698997 | 0.803821  |
| 5                | 1                | 0              | 1.670474                | 1.642057 | 0.918556  |
| 6                | 1                | 0              | 0.254132                | 1.781730 | -1.778724 |
| 7                | 1                | 0              | 1.228209                | 3.139225 | -1.212455 |
| 8                | 1                | 0              | -0.149074               | 3.530262 | 0.702562  |
| 9                | 1                | 0              | -1.263259               | 3.288542 | -0.654531 |
| 10               | 6                | 0              | 2.974275                | 1.278383 | -0.741884 |

|    |   |   |           |           |           |
|----|---|---|-----------|-----------|-----------|
| 11 | 1 | 0 | 2.934450  | 0.908206  | -1.778446 |
| 12 | 1 | 0 | 3.341811  | 2.313244  | -0.790673 |
| 13 | 6 | 0 | 4.006590  | 0.478044  | 0.064208  |
| 14 | 8 | 0 | -0.651634 | 1.525182  | 2.046405  |
| 15 | 1 | 0 | -0.151143 | 0.671652  | 2.066592  |
| 16 | 6 | 0 | -2.129703 | 0.772320  | 0.298110  |
| 17 | 6 | 0 | -2.632391 | -0.269684 | 1.122094  |
| 18 | 6 | 0 | -2.593904 | 0.833031  | -1.043888 |
| 19 | 6 | 0 | -3.533459 | -1.201036 | 0.624177  |
| 20 | 1 | 0 | -2.302356 | -0.327672 | 2.160181  |
| 21 | 6 | 0 | -3.494301 | -0.105554 | -1.527813 |
| 22 | 1 | 0 | -2.230668 | 1.618237  | -1.709070 |
| 23 | 6 | 0 | -3.970700 | -1.132400 | -0.703299 |
| 24 | 1 | 0 | -3.903574 | -1.992757 | 1.278573  |
| 25 | 1 | 0 | -3.831035 | -0.040487 | -2.564235 |
| 26 | 1 | 0 | -4.677232 | -1.867291 | -1.091293 |
| 27 | 6 | 0 | 0.993789  | -0.109691 | -0.056403 |
| 28 | 6 | 0 | 0.750484  | -0.837470 | -1.228590 |
| 29 | 6 | 0 | 0.333905  | -1.899412 | 1.240733  |
| 30 | 6 | 0 | 0.293906  | -2.146056 | -1.133301 |
| 31 | 1 | 0 | 0.927303  | -0.382470 | -2.204876 |
| 32 | 6 | 0 | 0.094549  | -2.701239 | 0.130104  |
| 33 | 1 | 0 | 0.157071  | -2.282917 | 2.249764  |
| 34 | 1 | 0 | 0.099744  | -2.730282 | -2.034331 |
| 35 | 1 | 0 | -0.256628 | -3.725290 | 0.254752  |
| 36 | 7 | 0 | 0.768311  | -0.639486 | 1.152529  |
| 37 | 1 | 0 | 3.976657  | 0.776558  | 1.122993  |
| 38 | 1 | 0 | 5.019715  | 0.696999  | -0.301785 |
| 39 | 6 | 0 | 3.847921  | -0.980429 | 0.011196  |
| 40 | 7 | 0 | 3.755380  | -2.130091 | -0.031643 |

-----  
M06-2X/def2-TZVP/SMD//M06-2X/def2-SVP G= -881.7385246290

INT2'

| Center<br>Number | Atomic<br>Number | Atomic<br>Type | Coordinates (Angstroms) |          |           |
|------------------|------------------|----------------|-------------------------|----------|-----------|
|                  |                  |                | X                       | Y        | Z         |
| 1                | 6                | 0              | 1.579236                | 1.359291 | -0.036635 |
| 2                | 6                | 0              | 0.605563                | 2.315886 | -0.741212 |
| 3                | 6                | 0              | -0.572832               | 2.782217 | 0.134793  |
| 4                | 6                | 0              | -1.313910               | 1.675312 | 0.803594  |
| 5                | 1                | 0              | 1.771993                | 1.757956 | 0.974845  |
| 6                | 1                | 0              | 0.223617                | 1.839961 | -1.658500 |



|    |   |   |           |           |           |
|----|---|---|-----------|-----------|-----------|
| 7  | 1 | 0 | 1.155553  | 3.212227  | -1.067411 |
| 8  | 1 | 0 | -0.195841 | 3.445251  | 0.927013  |
| 9  | 1 | 0 | -1.258769 | 3.379314  | -0.486439 |
| 10 | 6 | 0 | 2.923317  | 1.336480  | -0.780626 |
| 11 | 1 | 0 | 2.774764  | 0.996624  | -1.818285 |
| 12 | 1 | 0 | 3.307413  | 2.365291  | -0.837166 |
| 13 | 6 | 0 | 4.006889  | 0.485859  | -0.102884 |
| 14 | 8 | 0 | -1.054282 | 1.481133  | 2.100163  |
| 15 | 6 | 0 | -2.157227 | 0.727702  | 0.162181  |
| 16 | 6 | 0 | -2.513128 | 0.789358  | -1.210248 |
| 17 | 6 | 0 | -3.342423 | -1.234881 | 0.439220  |
| 18 | 6 | 0 | -3.302337 | -0.217449 | -1.733732 |
| 19 | 1 | 0 | -2.170223 | 1.615864  | -1.833737 |
| 20 | 6 | 0 | -3.729418 | -1.264170 | -0.902691 |
| 21 | 1 | 0 | -3.664657 | -2.031787 | 1.117646  |
| 22 | 1 | 0 | -3.589646 | -0.195893 | -2.786600 |
| 23 | 1 | 0 | -4.350536 | -2.075589 | -1.280152 |
| 24 | 6 | 0 | 1.023303  | -0.045393 | 0.129903  |
| 25 | 6 | 0 | 0.555012  | -0.769200 | -0.974770 |
| 26 | 6 | 0 | 0.545289  | -1.970907 | 1.534544  |
| 27 | 6 | 0 | 0.081211  | -2.070766 | -0.828097 |
| 28 | 1 | 0 | 0.555236  | -0.311598 | -1.967521 |
| 29 | 6 | 0 | 0.078210  | -2.678518 | 0.428654  |
| 30 | 1 | 0 | 0.543929  | -2.435367 | 2.522377  |
| 31 | 1 | 0 | -0.285937 | -2.615400 | -1.700108 |
| 32 | 1 | 0 | -0.293303 | -3.698236 | 0.544454  |
| 33 | 1 | 0 | 4.010721  | 0.661876  | 0.983864  |
| 34 | 1 | 0 | 4.999539  | 0.776168  | -0.475764 |
| 35 | 6 | 0 | 3.890639  | -0.960640 | -0.322845 |
| 36 | 7 | 0 | 3.851360  | -2.098326 | -0.512969 |
| 37 | 6 | 0 | 1.011660  | -0.664300 | 1.383244  |
| 38 | 1 | 0 | 1.362656  | -0.107617 | 2.255519  |
| 39 | 7 | 0 | -2.587788 | -0.280325 | 0.964782  |
| 40 | 1 | 0 | -1.521573 | 0.647161  | 2.327607  |

-----  
M06-2X/def2-TZVP/SMD//M06-2X/def2-SVP G= -881.716457
